# Supplementary material for: Hand Hygiene Beliefs, Knowledge, and Practices Among Operating Room Staff
Source: Research Square preprint supplement (doi:10.21203/rs.3.rs-7381122/v1), 2025-10-17
Supplement: Supplementary file 1 [file 47bf86cf0b19fb4e98c51a95.xlsx]

## Sheet: Form Yanıtları 1
Zaman damgası	Puan	Cinsiyet	Yaşınız	Medeni Durumunuz	Eğitim Durumunuz	Göreviniz	Çalıştığınız Birim	Bu İşyerindeki Çalışma Süreniz	Mesleki Toplam Çalışma Süreniz	Çalışma Şekliniz	El Hijyeni ile İlgili Özel Bir Eğitime Katıldınız Mı?	El Hijyeni İle İlgili Hizmet İçi Eğitim Programına Katıldınız Mı?	El Hijyeni İle İlgili Bilgilerinizi Nasıl Değerlendirirsiniz?	El Hijyeni İçin Sıkça Kullandığınız Malzeme?	El Yıkarken Ortalama Ne Kadar Süre Harcıyorsunuz?	Sizce El Hijyeni Kurallarına Uyumu Azaltan Durumlar Nelerdir? (Birden Fazla Seçenek İşaretleyebilirsiniz)	Sağlık kurumlarında el hijyeni, eğitimin önemli bir parçası olarak düşünülür.	Görev yaptığım servisler el hijyeninin önemini anlamamı kolaylaştırır.	Servis sorumlum/birim amirim, el hijyeninin önemini sık sık vurgular.	Diğer sağlık çalışanlarına rol modeli olma görevim vardır.	İşim yoğun olduğunda, el hijyenine dikkat etmektense işimi tamamlamak daha önemlidir.	Önerilen durumlarda el hijyenini gerçekleştirmek hasta ölüm (mortalite) oranını düşürebilir.	Önerilen durumlarda el hijyenini gerçekleştirmek, hastane kaynaklı enfeksiyonlarla ilgili maliyeti azaltabilir.	Hastalarımın ihtiyaçları daha öncelikli olduğu için, önerilen durumlarda el hijyenini her zaman gerçekleştiremiyorum.	Hastane enfeksiyonlarının önlenmesi sağlık çalışanlarının rolünün önemli bir parçasıdır.	El hijyenini gerçekleştirip gerçekleştirmeme konusunda deneyimli sağlık çalışanlarının davranışlarını örnek alırım.	Sağlık kurumlarından bulaşabilecek bir hastalık, hayatımı ya da kariyerimi tehdit edebilir.	Çalışma ortamındaki yanlış/kötü uygulamaları değiştirebilme gücüne sahip olduğuma inanıyorum.	Önerilen durumlarda el hijyenini sağlamamak, ihmalkârlık olarak düşünülebilir.	El hijyeni kişisel yaşamımda benim için bir alışkanlıktır.	El hijyeni konusundaki bilgimi klinik çalışmalarımda etkili bir şekilde uygulayabileceğim konusunda kendime güveniyorum.	Önerilen durumlarda el hijyenini sağlamayı hatırlamak bir çaba gerektirir.	Önerilen durumlarda el hijyenini sağlamayı hatırlamak bir çaba gerektirir.	Bir sağlık çalışanını el yıkaması konusunda uyarmak beni rahatsız eder.	El hijyenini sağlamak hastalıklara karşı bağışıklık kazanmayı yavaşlatır.	Kirli lavabolar elleri yıkamamak için bir gerekçe olabilir.	El hijyeni sağlayacak malzemelerin eksikliği elleri temizlememek için bir sebep olabilir.	Bir yaraya bakım sonrasında el hijyenini sağlamak enfeksiyonlardan koruyabilir.	Tuvaletten sonra elleri temizlemek enfeksiyon hastalığı bulaşma riskini azaltır.	Eller kirlenmediyse hastalar arasında el hijyeni sağlamaya gerek yoktur.	Eldiven kirlenmediyse hastalar arasında eldiven değiştirmeye gerek yoktur.	El hijyeninin yeterince sağlanmaması hastane enfeksiyonlarının oluşmasına ve yayılmasına neden olur.	El hijyeni alkol içeren antiseptik bir solüsyon ile el ovalanarak sağlanabilir.	El hijyeni ellerde görünen kir olduğunda su ve sabun ile yıkayarak sağlanmalıdır.	Hasta ile temastan önce el hijyeni uygularım.	Hasta ile temastan sonra el hijyeni uygularım	Hasta çevresi (etajer, yemek masası, monitör vb.) ile temastan sonra el hijyeni uygularım.	Aseptik (kan alma, aspirasyon, katater takma vb.) işlemler öncesinde el hijyeni uygularım.	Aseptik (kan alma, aspirasyon, katater takma vb.) işlemler sonrasında el hijyeni uygularım.
2022-07-28 16:55:34	0	Kadın	31-39 yaş	Bekâr	Doktora	Doktor	Dahiliye Klinikleri	5 yıl ve üzeri	11-15 yıl	Gündüz	Kurs	Katıldım	El hijyeni ile ilgili bilgilerimin yeterli olduğunu düşünüyorum.	Su ve sabun	15-30 saniye	İş yükünün fazla olması, El hijyeni için gerekli malzemelerin eksikliği, Antiseptik solüsyonlar ve sabunların elleri tahriş etmesi, Zaman kısıtlılığı	Katılıyorum	Katılıyorum	Kararsızım	Katılıyorum	Kararsızım	Kararsızım	Kararsızım	Katılıyorum	Katılıyorum	Katılıyorum	Katılıyorum	Kararsızım	Kararsızım	Kararsızım	Kararsızım	Kararsızım	Kararsızım	Katılıyorum	Kesinlikle Katılmıyorum	Kararsızım	Katılıyorum	Kesinlikle Katılıyorum	Kesinlikle Katılıyorum	Kesinlikle Katılmıyorum	Kesinlikle Katılmıyorum	Kesinlikle Katılıyorum	Katılıyorum	Kesinlikle Katılıyorum	Çoğu Zaman	Her Zaman	Sıklıkla	Her Zaman	Her Zaman
2022-07-29 20:07:16	0	Kadın	50 ve üzeri yaş	Bekâr	Yüksek Lisans	Doktor	Ameliyathane	3-4 yıl	16 yıl ve üzeri	Gündüz/Gece dönüşümlü	Katılmadım	Hiç Katılmadım	El hijyeni ile ilgili bilgilerimin yeterli olduğunu düşünüyorum.	Su ve sabun	30 saniyeden fazla	İş yükünün fazla olması, El hijyeni için gerekli malzemelerin eksikliği	Kesinlikle Katılıyorum	Kesinlikle Katılıyorum	Kesinlikle Katılıyorum	Kesinlikle Katılıyorum	Kesinlikle Katılmıyorum	Kesinlikle Katılıyorum	Kesinlikle Katılıyorum	Kesinlikle Katılmıyorum	Kesinlikle Katılıyorum	Kesinlikle Katılmıyorum	Kesinlikle Katılıyorum	Kesinlikle Katılıyorum	Kesinlikle Katılıyorum	Kesinlikle Katılıyorum	Kesinlikle Katılıyorum	Kesinlikle Katılıyorum	Kesinlikle Katılıyorum	Katılıyorum	Kesinlikle Katılmıyorum	Katılıyorum	Katılıyorum	Katılıyorum	Kesinlikle Katılıyorum	Kesinlikle Katılmıyorum	Kesinlikle Katılmıyorum	Kesinlikle Katılıyorum	Katılmıyorum	Katılıyorum	Her Zaman	Her Zaman	Her Zaman	Çoğu Zaman	Her Zaman
2022-08-02 23:20:18	0	Kadın	31-39 yaş	Evli	Doktora	Doktor	Ameliyathane	5 yıl ve üzeri	6-10 yıl	Gündüz/Gece dönüşümlü	Sempozyum	Katıldım	El hijyeni ile ilgili bilgilerimin yeterli olduğunu düşünüyorum.	Su ve sabun	15-30 saniye	Antiseptik solüsyonlar ve sabunların elleri tahriş etmesi, Zaman kısıtlılığı	Kararsızım	Kararsızım	Katılıyorum	Kesinlikle Katılıyorum	Katılıyorum	Katılıyorum	Katılıyorum	Katılıyorum	Kesinlikle Katılıyorum	Katılmıyorum	Kesinlikle Katılıyorum	Kesinlikle Katılmıyorum	Kararsızım	Kesinlikle Katılıyorum	Katılıyorum	Katılıyorum	Katılıyorum	Katılıyorum	Kararsızım	Kesinlikle Katılıyorum	Katılıyorum	Kesinlikle Katılıyorum	Kesinlikle Katılıyorum	Kesinlikle Katılmıyorum	Kesinlikle Katılmıyorum	Kesinlikle Katılıyorum	Katılmıyorum	Kesinlikle Katılıyorum	Çoğu Zaman	Çoğu Zaman	Sıklıkla	Bazen	Sıklıkla
2022-08-02 23:48:47	0	Kadın	50 ve üzeri yaş	Evli	Doktora	Doktor	Cerrahi Klinikleri	5 yıl ve üzeri	16 yıl ve üzeri	Gündüz	Katılmadım	Katıldım	El hijyeni ile ilgili bilgilerimin yeterli olduğunu düşünüyorum.	Su ve sabun	15-30 saniye	İş yükünün fazla olması, Zaman kısıtlılığı, Rol model eksikliği	Katılıyorum	Katılıyorum	Katılmıyorum	Katılıyorum	Kesinlikle Katılmıyorum	Katılıyorum	Katılıyorum	Katılıyorum	Kesinlikle Katılıyorum	Kararsızım	Katılmıyorum	Katılmıyorum	Katılıyorum	Kararsızım	Katılıyorum	Katılıyorum	Katılıyorum	Katılmıyorum	Katılmıyorum	Katılmıyorum	Katılıyorum	Katılıyorum	Katılıyorum	Kesinlikle Katılmıyorum	Kesinlikle Katılmıyorum	Katılıyorum	Katılıyorum	Katılmıyorum	Çoğu Zaman	Çoğu Zaman	Bazen	Bazen	Bazen
2022-08-03 00:08:49	0	Kadın	31-39 yaş	Evli	Yüksek Lisans	Doktor	Ameliyathane	0-2 yıl	6-10 yıl	Gündüz	Konferans	Katıldım	El hijyeni ile ilgili bilgilerimin yeterli olduğunu düşünüyorum.	Su ve sabun	30 saniyeden fazla	İş yükünün fazla olması, El hijyeni için gerekli malzemelerin eksikliği	Kesinlikle Katılıyorum	Kesinlikle Katılıyorum	Katılıyorum	Katılıyorum	Katılmıyorum	Katılıyorum	Kesinlikle Katılıyorum	Katılmıyorum	Kesinlikle Katılıyorum	Kesinlikle Katılıyorum	Kesinlikle Katılıyorum	Kararsızım	Katılıyorum	Katılıyorum	Katılıyorum	Kararsızım	Kararsızım	Kararsızım	Katılmıyorum	Kararsızım	Kararsızım	Katılıyorum	Kesinlikle Katılıyorum	Kesinlikle Katılmıyorum	Kesinlikle Katılmıyorum	Kesinlikle Katılıyorum	Kararsızım	Kararsızım	Çoğu Zaman	Çoğu Zaman	Çoğu Zaman	Çoğu Zaman	Çoğu Zaman
2022-08-03 00:15:44	0	Kadın	31-39 yaş	Evli	Yüksek Lisans	Doktor	YBÜ	5 yıl ve üzeri	11-15 yıl	Gündüz/Gece dönüşümlü	Konferans	Katıldım	El hijyeni ile ilgili bilgilerimi geliştirmem gerektiğini düşünüyorum.	Su ve sabun	15 saniyeden az	İş yükünün fazla olması, El hijyeni için bilgilendirici tabela, afiş, rehberlerin eksikliği, Antiseptik solüsyonlar ve sabunların elleri tahriş etmesi, Rol model eksikliği	Kesinlikle Katılıyorum	Katılıyorum	Katılıyorum	Kesinlikle Katılıyorum	Katılmıyorum	Katılıyorum	Kesinlikle Katılıyorum	Katılmıyorum	Kesinlikle Katılıyorum	Katılmıyorum	Katılıyorum	Kararsızım	Kararsızım	Katılıyorum	Katılıyorum	Katılmıyorum	Katılmıyorum	Katılmıyorum	Katılmıyorum	Kararsızım	Katılıyorum	Kesinlikle Katılıyorum	Kesinlikle Katılıyorum	Kesinlikle Katılmıyorum	Kesinlikle Katılmıyorum	Kesinlikle Katılıyorum	Kararsızım	Katılıyorum	Her Zaman	Her Zaman	Çoğu Zaman	Her Zaman	Her Zaman
2022-08-03 02:00:16	0	Kadın	50 ve üzeri yaş	Evli	Doktora	Doktor	Ameliyathane	5 yıl ve üzeri	16 yıl ve üzeri	Gündüz	Katılmadım	Hiç Katılmadım	El hijyeni ile ilgili bilgilerimin yeterli olduğunu düşünüyorum.	Su ve sabun	30 saniyeden fazla	İş yükünün fazla olması, El hijyeni için gerekli malzemelerin eksikliği, Antiseptik solüsyonlar ve sabunların elleri tahriş etmesi, El hijyeni ile ilgili yeterli bilgi sahibi olmamam	Kesinlikle Katılıyorum	Kesinlikle Katılıyorum	Kesinlikle Katılıyorum	Kesinlikle Katılıyorum	Katılıyorum	Kesinlikle Katılıyorum	Kesinlikle Katılıyorum	Katılmıyorum	Kesinlikle Katılıyorum	Katılıyorum	Kesinlikle Katılıyorum	Kesinlikle Katılıyorum	Kesinlikle Katılıyorum	Kesinlikle Katılıyorum	Kararsızım	Katılmıyorum	Katılmıyorum	Katılıyorum	Katılmıyorum	Katılıyorum	Katılıyorum	Katılıyorum	Kesinlikle Katılıyorum	Kesinlikle Katılmıyorum	Kesinlikle Katılmıyorum	Kesinlikle Katılıyorum	Katılıyorum	Kesinlikle Katılıyorum	Her Zaman	Her Zaman	Çoğu Zaman	Her Zaman	Her Zaman
2022-08-03 07:28:58	0	Erkek	50 ve üzeri yaş	Bekâr	Yüksek Lisans	Doktor	YBÜ	5 yıl ve üzeri	16 yıl ve üzeri	Gündüz	Konferans	Katıldım	El hijyeni ile ilgili bilgilerimin yeterli olduğunu düşünüyorum.	Su ve sabun	15-30 saniye	İş yükünün fazla olması, El hijyeni için gerekli malzemelerin eksikliği, Antiseptik solüsyonlar ve sabunların elleri tahriş etmesi, Zaman kısıtlılığı	Kesinlikle Katılıyorum	Kesinlikle Katılıyorum	Kesinlikle Katılıyorum	Kesinlikle Katılıyorum	Kesinlikle Katılmıyorum	Kesinlikle Katılıyorum	Kesinlikle Katılıyorum	Kesinlikle Katılmıyorum	Kesinlikle Katılıyorum	Kesinlikle Katılıyorum	Kesinlikle Katılıyorum	Kesinlikle Katılıyorum	Kesinlikle Katılıyorum	Kesinlikle Katılıyorum	Kesinlikle Katılıyorum	Kesinlikle Katılıyorum	Kesinlikle Katılıyorum	Kesinlikle Katılıyorum	Kesinlikle Katılmıyorum	Kesinlikle Katılmıyorum	Kesinlikle Katılıyorum	Kesinlikle Katılıyorum	Kesinlikle Katılıyorum	Kesinlikle Katılmıyorum	Kesinlikle Katılmıyorum	Kesinlikle Katılıyorum	Kesinlikle Katılmıyorum	Kesinlikle Katılmıyorum	Her Zaman	Her Zaman	Her Zaman	Her Zaman	Her Zaman
2022-08-03 08:33:34	0	Kadın	31-39 yaş	Evli	Doktora	Doktor	YBÜ	0-2 yıl	11-15 yıl	Gündüz	Kurum İçi Egitim	Katıldım	El hijyeni ile ilgili bilgilerimi geliştirmem gerektiğini düşünüyorum.	Alkol bazlı el dezenfektanı	15-30 saniye	İş yükünün fazla olması, El hijyeni için gerekli malzemelerin eksikliği, El hijyeni için bilgilendirici tabela, afiş, rehberlerin eksikliği, Antiseptik solüsyonlar ve sabunların elleri tahriş etmesi, Zaman kısıtlılığı	Kesinlikle Katılıyorum	Katılıyorum	Kesinlikle Katılıyorum	Kesinlikle Katılıyorum	Kesinlikle Katılmıyorum	Kesinlikle Katılıyorum	Kesinlikle Katılıyorum	Katılmıyorum	Kesinlikle Katılıyorum	Katılmıyorum	Kesinlikle Katılıyorum	Katılıyorum	Kesinlikle Katılıyorum	Katılıyorum	Katılıyorum	Kesinlikle Katılıyorum	Kesinlikle Katılıyorum	Kesinlikle Katılıyorum	Kesinlikle Katılmıyorum	Kesinlikle Katılıyorum	Kesinlikle Katılıyorum	Kesinlikle Katılıyorum	Kesinlikle Katılıyorum	Kesinlikle Katılmıyorum	Kesinlikle Katılmıyorum	Kesinlikle Katılıyorum	Kesinlikle Katılıyorum	Kesinlikle Katılıyorum	Çoğu Zaman	Çoğu Zaman	Sıklıkla	Her Zaman	Her Zaman
2022-08-03 09:22:18	0	Erkek	31-39 yaş	Bekâr	Yüksek Lisans	Doktor	Cerrahi Klinikleri	3-4 yıl	6-10 yıl	Gündüz/Gece dönüşümlü	Konferans	Hiç Katılmadım	El hijyeni ile ilgili bilgilerimin yeterli olduğunu düşünüyorum.	Alkol bazlı el dezenfektanı	15-30 saniye	İş yükünün fazla olması	Katılıyorum	Katılıyorum	Katılıyorum	Katılıyorum	Katılıyorum	Katılıyorum	Katılıyorum	Kararsızım	Katılıyorum	Kararsızım	Kararsızım	Katılıyorum	Katılıyorum	Katılıyorum	Kararsızım	Katılıyorum	Katılıyorum	Katılıyorum	Kararsızım	Katılıyorum	Katılıyorum	Katılıyorum	Katılıyorum	Katılıyorum	Kararsızım	Katılıyorum	Katılıyorum	Kararsızım	Çoğu Zaman	Çoğu Zaman	Çoğu Zaman	Çoğu Zaman	Çoğu Zaman
2022-08-03 09:28:01	0	Erkek	21-30 yaş	Bekâr	Yüksek Lisans	Doktor	Ameliyathane	0-2 yıl	0-11 ay	Gündüz	Konferans	Hiç Katılmadım	El hijyeni ile ilgili bilgilerimi geliştirmem gerektiğini düşünüyorum.	Alkol bazlı el dezenfektanı	15 saniyeden az	Zaman kısıtlılığı	Katılıyorum	Katılmıyorum	Katılmıyorum	Katılıyorum	Katılmıyorum	Katılıyorum	Katılıyorum	Katılıyorum	Kesinlikle Katılıyorum	Katılmıyorum	Katılıyorum	Katılıyorum	Katılıyorum	Katılıyorum	Katılıyorum	Katılıyorum	Katılıyorum	Katılmıyorum	Katılmıyorum	Katılmıyorum	Katılmıyorum	Katılıyorum	Katılıyorum	Katılmıyorum	Katılmıyorum	Katılıyorum	Katılıyorum	Kararsızım	Bazen	Sıklıkla	Bazen	Sıklıkla	Bazen
2022-08-03 09:38:38	0	Kadın	50 ve üzeri yaş	Evli	Yüksek Lisans	Doktor	Ameliyathane	5 yıl ve üzeri	16 yıl ve üzeri	Gündüz	Sempozyum	Katıldım	El hijyeni ile ilgili bilgilerimin yeterli olduğunu düşünüyorum.	Su ve sabun	30 saniyeden fazla	İş yükünün fazla olması, El hijyeni için gerekli malzemelerin eksikliği, Antiseptik solüsyonlar ve sabunların elleri tahriş etmesi	Kesinlikle Katılıyorum	Kesinlikle Katılıyorum	Katılıyorum	Kesinlikle Katılıyorum	Katılmıyorum	Katılıyorum	Kesinlikle Katılıyorum	Katılmıyorum	Kesinlikle Katılıyorum	Kararsızım	Katılıyorum	Katılmıyorum	Katılıyorum	Katılıyorum	Kararsızım	Katılmıyorum	Katılmıyorum	Katılmıyorum	Kararsızım	Katılıyorum	Katılıyorum	Katılıyorum	Katılıyorum	Katılmıyorum	Katılmıyorum	Katılıyorum	Katılıyorum	Katılıyorum	Bazen	Sıklıkla	Sıklıkla	Bazen	Sıklıkla
2022-08-03 09:54:39	0	Kadın	50 ve üzeri yaş	Evli	Doktora	Doktor	Dahiliye Klinikleri	3-4 yıl	16 yıl ve üzeri	Gündüz	Kurum İçi Egitim	Katıldım	El hijyeni ile ilgili bilgilerimi geliştirmem gerektiğini düşünüyorum.	Su ve sabun	15-30 saniye	Antiseptik solüsyonlar ve sabunların elleri tahriş etmesi	Katılıyorum	Katılıyorum	Katılıyorum	Katılıyorum	Katılmıyorum	Katılıyorum	Katılıyorum	Katılmıyorum	Katılıyorum	Kararsızım	Katılıyorum	Kararsızım	Katılıyorum	Katılıyorum	Katılıyorum	Katılmıyorum	Katılmıyorum	Katılıyorum	Katılmıyorum	Katılıyorum	Katılmıyorum	Katılıyorum	Katılıyorum	Katılmıyorum	Katılmıyorum	Katılıyorum	Kararsızım	Katılıyorum	Çoğu Zaman	Çoğu Zaman	Çoğu Zaman	Çoğu Zaman	Çoğu Zaman
2022-08-03 11:22:24	0	Kadın	21-30 yaş	Evli	Yüksek Lisans	Doktor	Ameliyathane	3-4 yıl	1-5 yıl	Gündüz/Gece dönüşümlü	Sempozyum	Katıldım	El hijyeni ile ilgili bilgilerimin yeterli olduğunu düşünüyorum.	Su ve sabun	15-30 saniye	İş yükünün fazla olması, El hijyeni için gerekli malzemelerin eksikliği, Antiseptik solüsyonlar ve sabunların elleri tahriş etmesi, Zaman kısıtlılığı	Katılıyorum	Kesinlikle Katılıyorum	Kesinlikle Katılıyorum	Kesinlikle Katılıyorum	Kararsızım	Kesinlikle Katılıyorum	Kesinlikle Katılıyorum	Katılıyorum	Katılıyorum	Katılıyorum	Kesinlikle Katılıyorum	Katılmıyorum	Katılıyorum	Katılıyorum	Kesinlikle Katılıyorum	Katılmıyorum	Katılmıyorum	Katılmıyorum	Katılmıyorum	Katılmıyorum	Katılıyorum	Kesinlikle Katılıyorum	Kesinlikle Katılıyorum	Kesinlikle Katılmıyorum	Kesinlikle Katılmıyorum	Kesinlikle Katılıyorum	Katılmıyorum	Katılıyorum	Çoğu Zaman	Her Zaman	Çoğu Zaman	Her Zaman	Her Zaman
2022-08-03 11:39:09	0	Erkek	31-39 yaş	Evli	Doktora	Doktor	Ameliyathane	3-4 yıl	6-10 yıl	Gündüz/Gece dönüşümlü	Konferans	Katıldım	El hijyeni ile ilgili bilgilerimin yeterli olduğunu düşünüyorum.	Alkol bazlı el dezenfektanı	15-30 saniye	İş yükünün fazla olması, Antiseptik solüsyonlar ve sabunların elleri tahriş etmesi, Zaman kısıtlılığı	Katılıyorum	Kararsızım	Kesinlikle Katılıyorum	Katılıyorum	Katılıyorum	Katılıyorum	Katılıyorum	Katılmıyorum	Katılıyorum	Katılıyorum	Katılıyorum	Katılıyorum	Katılıyorum	Katılıyorum	Katılıyorum	Kesinlikle Katılmıyorum	Kesinlikle Katılmıyorum	Kesinlikle Katılıyorum	Katılıyorum	Katılmıyorum	Katılmıyorum	Katılıyorum	Katılıyorum	Katılmıyorum	Katılmıyorum	Katılıyorum	Katılıyorum	Katılıyorum	Çoğu Zaman	Çoğu Zaman	Çoğu Zaman	Çoğu Zaman	Çoğu Zaman
2022-08-03 11:39:34	0	Kadın	31-39 yaş	Evli	Yüksek Lisans	Doktor	Cerrahi Klinikleri	5 yıl ve üzeri	6-10 yıl	Gündüz/Gece dönüşümlü	Sempozyum	Katıldım	El hijyeni ile ilgili bilgilerimi geliştirmem gerektiğini düşünüyorum.	Su ve sabun	15-30 saniye	İş yükünün fazla olması, Zaman kısıtlılığı	Kesinlikle Katılıyorum	Katılıyorum	Katılıyorum	Katılıyorum	Katılmıyorum	Katılıyorum	Katılıyorum	Katılıyorum	Katılıyorum	Katılmıyorum	Katılıyorum	Katılıyorum	Katılıyorum	Katılıyorum	Katılıyorum	Katılıyorum	Kararsızım	Katılmıyorum	Katılmıyorum	Katılmıyorum	Katılıyorum	Katılıyorum	Kesinlikle Katılıyorum	Katılmıyorum	Kesinlikle Katılmıyorum	Kesinlikle Katılıyorum	Katılıyorum	Katılıyorum	Bazen	Çoğu Zaman	Sıklıkla	Sıklıkla	Çoğu Zaman
2022-08-03 19:50:09	0	Kadın	40-49 yaş	Evli	Üniversite	Hemşire/Sağlık Memuru	Ameliyathane	5 yıl ve üzeri	16 yıl ve üzeri	Gündüz/Gece dönüşümlü	Kurum İçi Egitim	Katıldım	El hijyeni ile ilgili bilgilerimin yeterli olduğunu düşünüyorum.	Su ve sabun	15-30 saniye	Antiseptik solüsyonlar ve sabunların elleri tahriş etmesi	Kesinlikle Katılıyorum	Kesinlikle Katılıyorum	Kesinlikle Katılıyorum	Kesinlikle Katılıyorum	Kesinlikle Katılmıyorum	Kesinlikle Katılıyorum	Kesinlikle Katılıyorum	Kesinlikle Katılmıyorum	Kesinlikle Katılıyorum	Kararsızım	Kesinlikle Katılıyorum	Kesinlikle Katılıyorum	Kesinlikle Katılıyorum	Kesinlikle Katılıyorum	Kesinlikle Katılıyorum	Katılmıyorum	Katılmıyorum	Katılıyorum	Katılmıyorum	Katılıyorum	Katılıyorum	Katılıyorum	Kesinlikle Katılıyorum	Kesinlikle Katılmıyorum	Kesinlikle Katılmıyorum	Kesinlikle Katılıyorum	Katılıyorum	Kesinlikle Katılıyorum	Her Zaman	Her Zaman	Çoğu Zaman	Her Zaman	Her Zaman
2022-08-03 21:35:49	0	Kadın	31-39 yaş	Bekâr	Yüksek Lisans	Doktor	Ameliyathane	5 yıl ve üzeri	6-10 yıl	Gündüz/Gece dönüşümlü	Sempozyum	Katıldım	El hijyeni ile ilgili bilgilerimi geliştirmem gerektiğini düşünüyorum.	Su ve sabun	15 saniyeden az	El hijyeni için bilgilendirici tabela, afiş, rehberlerin eksikliği, Antiseptik solüsyonlar ve sabunların elleri tahriş etmesi, Zaman kısıtlılığı	Katılıyorum	Katılıyorum	Katılmıyorum	Katılıyorum	Katılıyorum	Kesinlikle Katılıyorum	Kesinlikle Katılıyorum	Kararsızım	Katılıyorum	Katılıyorum	Kesinlikle Katılıyorum	Katılıyorum	Katılıyorum	Katılıyorum	Katılıyorum	Katılıyorum	Katılıyorum	Katılıyorum	Katılmıyorum	Kararsızım	Katılıyorum	Katılıyorum	Kesinlikle Katılıyorum	Katılmıyorum	Katılmıyorum	Kesinlikle Katılıyorum	Katılıyorum	Katılmıyorum	Bazen	Çoğu Zaman	Sıklıkla	Sıklıkla	Her Zaman
2022-09-02 23:23:33	0	Kadın	31-39 yaş	Evli	Doktora	Doktor	Cerrahi Klinikleri	5 yıl ve üzeri	16 yıl ve üzeri	Gündüz	Kurum İçi Egitim	Katıldım	El hijyeni ile ilgili bilgilerimin yeterli olduğunu düşünüyorum.	Su ve sabun	15-30 saniye	İş yükünün fazla olması, El hijyeni için gerekli malzemelerin eksikliği, Antiseptik solüsyonlar ve sabunların elleri tahriş etmesi, Zaman kısıtlılığı, Eldiven giymenin el hijyeni için yeterli olması	Katılıyorum	Katılıyorum	Katılıyorum	Kararsızım	Kararsızım	Kararsızım	Katılıyorum	Kararsızım	Kararsızım	Kararsızım	Kararsızım	Kararsızım	Kararsızım	Kararsızım	Kararsızım	Kararsızım	Kararsızım	Kararsızım	Kararsızım	Kararsızım	Kararsızım	Kararsızım	Kararsızım	Kararsızım	Kararsızım	Kararsızım	Kararsızım	Kararsızım	Bazen	Her Zaman	Bazen	Her Zaman	Sıklıkla
2022-09-06 13:43:14	0	Kadın	31-39 yaş	Evli	Yüksek Lisans	Doktor	Ameliyathane	0-2 yıl	6-10 yıl	Gündüz	Konferans	Katıldım	El hijyeni ile ilgili bilgilerimi geliştirmem gerektiğini düşünüyorum.	Su ve sabun	15-30 saniye	İş yükünün fazla olması, El hijyeni için gerekli malzemelerin eksikliği	Katılıyorum	Katılıyorum	Katılıyorum	Katılıyorum	Kesinlikle Katılmıyorum	Katılıyorum	Katılıyorum	Katılmıyorum	Katılıyorum	Katılıyorum	Katılıyorum	Katılıyorum	Katılıyorum	Katılıyorum	Katılıyorum	Kararsızım	Kararsızım	Kararsızım	Katılmıyorum	Katılmıyorum	Katılmıyorum	Katılıyorum	Katılıyorum	Katılmıyorum	Kesinlikle Katılmıyorum	Kesinlikle Katılıyorum	Katılıyorum	Katılıyorum	Çoğu Zaman	Çoğu Zaman	Çoğu Zaman	Çoğu Zaman	Çoğu Zaman
2022-09-06 13:44:04	0	Erkek	21-30 yaş	Evli	Yüksek Lisans	Doktor	Ameliyathane	0-2 yıl	1-5 yıl	Gündüz/Gece dönüşümlü	Kurs	Katıldım	El hijyeni ile ilgili bilgilerimin yeterli olduğunu düşünüyorum.	Su ve sabun	15-30 saniye	İş yükünün fazla olması, Zaman kısıtlılığı	Kesinlikle Katılıyorum	Kesinlikle Katılıyorum	Kesinlikle Katılıyorum	Katılıyorum	Katılmıyorum	Kesinlikle Katılıyorum	Kesinlikle Katılıyorum	Katılmıyorum	Kesinlikle Katılıyorum	Katılıyorum	Katılıyorum	Katılıyorum	Katılıyorum	Kesinlikle Katılıyorum	Kesinlikle Katılıyorum	Katılıyorum	Katılıyorum	Katılıyorum	Katılmıyorum	Katılmıyorum	Kararsızım	Kesinlikle Katılıyorum	Kesinlikle Katılıyorum	Katılmıyorum	Katılmıyorum	Katılıyorum	Katılıyorum	Katılıyorum	Çoğu Zaman	Her Zaman	Her Zaman	Her Zaman	Her Zaman
2022-09-06 14:10:58	0	Erkek	31-39 yaş	Bekâr	Yüksek Lisans	Doktor	Cerrahi Klinikleri	3-4 yıl	6-10 yıl	Gündüz/Gece dönüşümlü	Konferans	Hiç Katılmadım	El hijyeni ile ilgili bilgilerimin yeterli olduğunu düşünüyorum.	Alkol bazlı el dezenfektanı	15-30 saniye	İş yükünün fazla olması	Katılıyorum	Katılıyorum	Katılıyorum	Kararsızım	Kararsızım	Katılıyorum	Katılıyorum	Kararsızım	Katılıyorum	Katılıyorum	Katılıyorum	Katılıyorum	Katılıyorum	Katılıyorum	Katılıyorum	Katılıyorum	Katılıyorum	Katılıyorum	Katılıyorum	Katılıyorum	Katılıyorum	Katılıyorum	Katılıyorum	Katılıyorum	Katılıyorum	Katılıyorum	Katılıyorum	Katılıyorum	Çoğu Zaman	Çoğu Zaman	Sıklıkla	Çoğu Zaman	Çoğu Zaman
2022-09-06 14:12:09	0	Kadın	21-30 yaş	Evli	Yüksek Lisans	Doktor	Acil Servis	3-4 yıl	1-5 yıl	Gündüz/Gece dönüşümlü	Konferans	Katıldım	El hijyeni ile ilgili bilgilerimin yeterli olduğunu düşünüyorum.	Su ve sabun	15-30 saniye	İş yükünün fazla olması, El hijyeni için gerekli malzemelerin eksikliği, Antiseptik solüsyonlar ve sabunların elleri tahriş etmesi, Zaman kısıtlılığı	Kesinlikle Katılıyorum	Kesinlikle Katılıyorum	Kesinlikle Katılıyorum	Kesinlikle Katılıyorum	Katılıyorum	Kesinlikle Katılıyorum	Kesinlikle Katılıyorum	Katılıyorum	Kesinlikle Katılıyorum	Kararsızım	Kesinlikle Katılıyorum	Kesinlikle Katılıyorum	Kesinlikle Katılıyorum	Kesinlikle Katılıyorum	Kesinlikle Katılıyorum	Katılıyorum	Katılmıyorum	Katılmıyorum	Katılmıyorum	Kararsızım	Katılıyorum	Kesinlikle Katılıyorum	Kesinlikle Katılıyorum	Kesinlikle Katılmıyorum	Kesinlikle Katılmıyorum	Kesinlikle Katılıyorum	Kararsızım	Kesinlikle Katılıyorum	Çoğu Zaman	Her Zaman	Çoğu Zaman	Çoğu Zaman	Her Zaman
2022-09-06 14:34:59	0	Erkek	31-39 yaş	Evli	Yüksek Lisans	Doktor	Ameliyathane	3-4 yıl	6-10 yıl	Gündüz/Gece dönüşümlü	Konferans	Katıldım	El hijyeni ile ilgili bilgilerimin yeterli olduğunu düşünüyorum.	Alkol bazlı el dezenfektanı	15-30 saniye	Zaman kısıtlılığı, Eldiven giymenin el hijyeni için yeterli olması	Kesinlikle Katılıyorum	Kesinlikle Katılıyorum	Katılıyorum	Kararsızım	Kesinlikle Katılmıyorum	Kesinlikle Katılıyorum	Kesinlikle Katılıyorum	Kesinlikle Katılmıyorum	Kesinlikle Katılıyorum	Kesinlikle Katılmıyorum	Kesinlikle Katılıyorum	Katılıyorum	Kararsızım	Katılıyorum	Katılıyorum	Katılmıyorum	Katılmıyorum	Katılmıyorum	Kesinlikle Katılmıyorum	Katılıyorum	Katılıyorum	Katılıyorum	Kesinlikle Katılıyorum	Katılmıyorum	Kesinlikle Katılmıyorum	Kesinlikle Katılıyorum	Katılıyorum	Katılıyorum	Çoğu Zaman	Çoğu Zaman	Çoğu Zaman	Bazen	Çoğu Zaman
2022-09-06 14:51:50	0	Erkek	31-39 yaş	Evli	Yüksek Lisans	Doktor	Ameliyathane	3-4 yıl	6-10 yıl	Gündüz/Gece dönüşümlü	Konferans	Katıldım	El hijyeni ile ilgili bilgilerimin yeterli olduğunu düşünüyorum.	Povidon-iyot çözeltileri	15-30 saniye	İş yükünün fazla olması, Antiseptik solüsyonlar ve sabunların elleri tahriş etmesi, Zaman kısıtlılığı, Eldiven giymenin el hijyeni için yeterli olması	Kararsızım	Kararsızım	Kesinlikle Katılıyorum	Kararsızım	Kararsızım	Kararsızım	Katılıyorum	Kararsızım	Katılıyorum	Kararsızım	Kesinlikle Katılıyorum	Kararsızım	Kararsızım	Katılıyorum	Katılıyorum	Katılıyorum	Katılıyorum	Katılıyorum	Katılıyorum	Kesinlikle Katılıyorum	Kesinlikle Katılıyorum	Kesinlikle Katılıyorum	Kesinlikle Katılıyorum	Kesinlikle Katılıyorum	Kesinlikle Katılıyorum	Kesinlikle Katılıyorum	Kararsızım	Kararsızım	Bazen	Çoğu Zaman	Bazen	Bazen	Çoğu Zaman
2022-09-06 15:00:48	0	Erkek	21-30 yaş	Evli	Yüksek Lisans	Doktor	Cerrahi Klinikleri	0-2 yıl	1-5 yıl	Gündüz/Gece dönüşümlü	Konferans	Katıldım	El hijyeni ile ilgili bilgilerimin yeterli olduğunu düşünüyorum.	Su ve sabun	15-30 saniye	İş yükünün fazla olması, Zaman kısıtlılığı	Katılıyorum	Katılmıyorum	Katılıyorum	Katılıyorum	Katılmıyorum	Katılıyorum	Katılıyorum	Katılmıyorum	Katılıyorum	Katılmıyorum	Katılıyorum	Katılıyorum	Katılmıyorum	Katılıyorum	Katılıyorum	Katılıyorum	Katılıyorum	Katılıyorum	Katılmıyorum	Katılıyorum	Katılıyorum	Katılıyorum	Katılıyorum	Katılmıyorum	Katılmıyorum	Katılıyorum	Katılıyorum	Katılıyorum	Çoğu Zaman	Çoğu Zaman	Çoğu Zaman	Her Zaman	Her Zaman
2022-09-06 15:02:15	0	Kadın	21-30 yaş	Bekâr	Yüksek Lisans	Doktor	Cerrahi Klinikleri	0-2 yıl	1-5 yıl	Gündüz/Gece dönüşümlü	Kurs	Katıldım	El hijyeni ile ilgili bilgilerimin yeterli olduğunu düşünüyorum.	Su ve sabun	15-30 saniye	İş yükünün fazla olması, Zaman kısıtlılığı	Kesinlikle Katılıyorum	Kesinlikle Katılıyorum	Katılıyorum	Katılıyorum	Katılmıyorum	Katılıyorum	Kesinlikle Katılıyorum	Kararsızım	Katılıyorum	Katılıyorum	Kesinlikle Katılıyorum	Kararsızım	Katılıyorum	Katılıyorum	Katılıyorum	Katılmıyorum	Katılmıyorum	Katılıyorum	Kesinlikle Katılmıyorum	Katılmıyorum	Katılıyorum	Kesinlikle Katılıyorum	Kesinlikle Katılıyorum	Kesinlikle Katılmıyorum	Kesinlikle Katılmıyorum	Kesinlikle Katılıyorum	Katılıyorum	Katılıyorum	Sıklıkla	Her Zaman	Çoğu Zaman	Her Zaman	Her Zaman
2022-09-06 15:05:05	0	Erkek	21-30 yaş	Evli	Yüksek Lisans	Doktor	Cerrahi Klinikleri	0-2 yıl	1-5 yıl	Gündüz/Gece dönüşümlü	Konferans	Katıldım	El hijyeni ile ilgili bilgilerimin yeterli olduğunu düşünüyorum.	Alkol bazlı el dezenfektanı	15-30 saniye	İş yükünün fazla olması, Zaman kısıtlılığı	Katılıyorum	Katılıyorum	Katılıyorum	Katılıyorum	Katılmıyorum	Katılıyorum	Katılıyorum	Katılmıyorum	Katılıyorum	Katılıyorum	Katılıyorum	Katılıyorum	Katılıyorum	Katılıyorum	Katılıyorum	Katılıyorum	Katılıyorum	Katılıyorum	Katılmıyorum	Katılıyorum	Katılıyorum	Katılıyorum	Katılıyorum	Katılıyorum	Katılıyorum	Katılıyorum	Katılıyorum	Kesinlikle Katılıyorum	Çoğu Zaman	Çoğu Zaman	Her Zaman	Her Zaman	Her Zaman
2022-09-06 15:18:11	0	Kadın	40-49 yaş	Evli	Üniversite	Hemşire/Sağlık Memuru	Ameliyathane	5 yıl ve üzeri	16 yıl ve üzeri	Gündüz/Gece dönüşümlü	Kurum İçi Egitim	Katıldım	El hijyeni ile ilgili bilgilerimin yeterli olduğunu düşünüyorum.	Povidon-iyot çözeltileri	30 saniyeden fazla	El hijyeni için gerekli malzemelerin eksikliği, Antiseptik solüsyonlar ve sabunların elleri tahriş etmesi	Katılıyorum	Katılıyorum	Kararsızım	Kararsızım	Katılmıyorum	Katılıyorum	Katılıyorum	Katılmıyorum	Katılıyorum	Kararsızım	Katılıyorum	Katılmıyorum	Katılıyorum	Katılıyorum	Katılıyorum	Kararsızım	Kararsızım	Katılmıyorum	Katılmıyorum	Katılıyorum	Katılıyorum	Katılıyorum	Katılıyorum	Katılmıyorum	Katılmıyorum	Kesinlikle Katılıyorum	Kararsızım	Katılıyorum	Her Zaman	Her Zaman	Her Zaman	Her Zaman	Her Zaman
2022-09-06 15:24:22	0	Kadın	31-39 yaş	Bekâr	Üniversite	Hemşire/Sağlık Memuru	Ameliyathane	5 yıl ve üzeri	11-15 yıl	Gündüz/Gece dönüşümlü	Kurum İçi Egitim	Katıldım	El hijyeni ile ilgili bilgilerimin yeterli olduğunu düşünüyorum.	Klorkeksidin	30 saniyeden fazla	El hijyeni için gerekli malzemelerin eksikliği, Antiseptik solüsyonlar ve sabunların elleri tahriş etmesi	Kesinlikle Katılıyorum	Katılıyorum	Katılıyorum	Katılıyorum	Katılıyorum	Katılıyorum	Kesinlikle Katılıyorum	Katılıyorum	Kesinlikle Katılıyorum	Katılmıyorum	Kesinlikle Katılmıyorum	Katılmıyorum	Katılıyorum	Kesinlikle Katılıyorum	Kesinlikle Katılıyorum	Katılıyorum	Katılıyorum	Kararsızım	Katılmıyorum	Katılıyorum	Katılıyorum	Katılıyorum	Kesinlikle Katılıyorum	Kesinlikle Katılmıyorum	Kesinlikle Katılmıyorum	Kesinlikle Katılıyorum	Katılmıyorum	Katılmıyorum	Her Zaman	Her Zaman	Her Zaman	Her Zaman	Her Zaman
2022-09-06 15:26:06	0	Erkek	21-30 yaş	Evli	İlkokul/Ortaokul	Temizlik Personeli	Ameliyathane	3-4 yıl	1-5 yıl	Gündüz/Gece dönüşümlü	Konferans	Katıldım	El hijyeni ile ilgili bilgilerimin yeterli olduğunu düşünüyorum.	Alkol bazlı el dezenfektanı	30 saniyeden fazla	El hijyeni için gerekli malzemelerin eksikliği, El hijyeni için bilgilendirici tabela, afiş, rehberlerin eksikliği, Antiseptik solüsyonlar ve sabunların elleri tahriş etmesi, El hijyeni ile ilgili yeterli bilgi sahibi olmamam	Kesinlikle Katılıyorum	Kesinlikle Katılıyorum	Kesinlikle Katılıyorum	Kesinlikle Katılıyorum	Katılmıyorum	Kesinlikle Katılıyorum	Kesinlikle Katılıyorum	Kesinlikle Katılmıyorum	Kesinlikle Katılıyorum	Kesinlikle Katılıyorum	Kesinlikle Katılıyorum	Kesinlikle Katılıyorum	Kesinlikle Katılıyorum	Kesinlikle Katılıyorum	Kesinlikle Katılıyorum	Kesinlikle Katılmıyorum	Kesinlikle Katılmıyorum	Kesinlikle Katılmıyorum	Kesinlikle Katılmıyorum	Katılmıyorum	Katılmıyorum	Kesinlikle Katılıyorum	Kesinlikle Katılıyorum	Kesinlikle Katılmıyorum	Kesinlikle Katılmıyorum	Kesinlikle Katılıyorum	Katılıyorum	Kesinlikle Katılmıyorum	Her Zaman	Her Zaman	Her Zaman	Her Zaman	Her Zaman
2022-09-06 15:26:15	0	Erkek	21-30 yaş	Evli	Doktora	Doktor	Cerrahi Klinikleri	0-2 yıl	1-5 yıl	Gündüz/Gece dönüşümlü	Konferans	Katıldım	El hijyeni ile ilgili bilgilerimin yeterli olduğunu düşünüyorum.	Su ve sabun	30 saniyeden fazla	İş yükünün fazla olması, El hijyeni için gerekli malzemelerin eksikliği	Kesinlikle Katılıyorum	Kesinlikle Katılıyorum	Kesinlikle Katılıyorum	Kesinlikle Katılıyorum	Katılmıyorum	Kesinlikle Katılıyorum	Kesinlikle Katılıyorum	Katılmıyorum	Kesinlikle Katılıyorum	Katılıyorum	Kesinlikle Katılıyorum	Katılıyorum	Katılıyorum	Kesinlikle Katılıyorum	Kesinlikle Katılıyorum	Katılıyorum	Katılıyorum	Katılıyorum	Kesinlikle Katılmıyorum	Kesinlikle Katılmıyorum	Katılmıyorum	Kesinlikle Katılıyorum	Kesinlikle Katılıyorum	Kesinlikle Katılmıyorum	Kesinlikle Katılmıyorum	Kesinlikle Katılıyorum	Katılmıyorum	Katılıyorum	Çoğu Zaman	Çoğu Zaman	Çoğu Zaman	Her Zaman	Her Zaman
2022-09-06 15:32:46	0	Erkek	31-39 yaş	Evli	Üniversite	Hemşire/Sağlık Memuru	Ameliyathane	5 yıl ve üzeri	11-15 yıl	Gündüz/Gece dönüşümlü	Kurum İçi Egitim	Katıldım	El hijyeni ile ilgili bilgilerimin yeterli olduğunu düşünüyorum.	Alkol bazlı el dezenfektanı	15-30 saniye	Eldiven giymenin el hijyeni için yeterli olması	Kesinlikle Katılmıyorum	Kesinlikle Katılmıyorum	Katılıyorum	Kesinlikle Katılıyorum	Katılmıyorum	Kesinlikle Katılıyorum	Kesinlikle Katılıyorum	Katılmıyorum	Kesinlikle Katılıyorum	Kararsızım	Kesinlikle Katılıyorum	Kesinlikle Katılıyorum	Katılıyorum	Kesinlikle Katılıyorum	Katılıyorum	Kararsızım	Kararsızım	Kesinlikle Katılıyorum	Kesinlikle Katılmıyorum	Katılmıyorum	Katılıyorum	Kesinlikle Katılıyorum	Kesinlikle Katılıyorum	Kesinlikle Katılmıyorum	Kesinlikle Katılmıyorum	Kesinlikle Katılıyorum	Katılıyorum	Katılıyorum	Sıklıkla	Her Zaman	Çoğu Zaman	Hiçbir Zaman	Her Zaman
2022-09-06 15:34:30	0	Erkek	21-30 yaş	Evli	Yüksek Lisans	Doktor	Ameliyathane	0-2 yıl	1-5 yıl	Gündüz/Gece dönüşümlü	Konferans	Katıldım	El hijyeni ile ilgili bilgilerimin yeterli olduğunu düşünüyorum.	Su ve sabun	30 saniyeden fazla	El hijyeni için gerekli malzemelerin eksikliği	Katılıyorum	Kesinlikle Katılmıyorum	Katılıyorum	Katılıyorum	Katılmıyorum	Katılıyorum	Katılıyorum	Katılmıyorum	Katılıyorum	Katılıyorum	Katılıyorum	Katılıyorum	Katılıyorum	Katılıyorum	Katılıyorum	Katılıyorum	Katılıyorum	Katılıyorum	Katılıyorum	Kesinlikle Katılıyorum	Kesinlikle Katılıyorum	Kesinlikle Katılıyorum	Kesinlikle Katılıyorum	Kesinlikle Katılmıyorum	Kesinlikle Katılmıyorum	Katılıyorum	Katılıyorum	Kesinlikle Katılıyorum	Çoğu Zaman	Çoğu Zaman	Çoğu Zaman	Çoğu Zaman	Çoğu Zaman
2022-09-06 15:48:13	0	Erkek	31-39 yaş	Evli	Yüksekokul	Hemşire/Sağlık Memuru	Ameliyathane	5 yıl ve üzeri	11-15 yıl	Gündüz/Gece dönüşümlü	Kurs	Katıldım	El hijyeni ile ilgili bilgilerimin yeterli olduğunu düşünüyorum.	Povidon-iyot çözeltileri	30 saniyeden fazla	İş yükünün fazla olması, El hijyeni için gerekli malzemelerin eksikliği, El hijyeni için bilgilendirici tabela, afiş, rehberlerin eksikliği, Antiseptik solüsyonlar ve sabunların elleri tahriş etmesi	Katılıyorum	Katılıyorum	Katılıyorum	Katılıyorum	Katılmıyorum	Katılıyorum	Katılıyorum	Katılmıyorum	Katılıyorum	Katılmıyorum	Katılıyorum	Katılıyorum	Katılıyorum	Katılıyorum	Kararsızım	Kararsızım	Kararsızım	Katılmıyorum	Katılmıyorum	Kararsızım	Kararsızım	Katılıyorum	Katılıyorum	Katılmıyorum	Katılmıyorum	Katılıyorum	Katılıyorum	Katılmıyorum	Her Zaman	Her Zaman	Bazen	Her Zaman	Her Zaman
2022-09-06 16:02:21	0	Kadın	21-30 yaş	Evli	Yüksekokul	Hemşire/Sağlık Memuru	Ameliyathane	5 yıl ve üzeri	11-15 yıl	Gündüz/Gece dönüşümlü	Kurum İçi Egitim	Katıldım	El hijyeni ile ilgili bilgilerimin yeterli olduğunu düşünüyorum.	Su ve sabun	15-30 saniye	İş yükünün fazla olması, Antiseptik solüsyonlar ve sabunların elleri tahriş etmesi, Zaman kısıtlılığı	Katılıyorum	Kararsızım	Katılıyorum	Katılmıyorum	Katılıyorum	Katılıyorum	Katılıyorum	Katılıyorum	Katılıyorum	Kararsızım	Katılıyorum	Kesinlikle Katılmıyorum	Katılıyorum	Katılıyorum	Katılıyorum	Katılmıyorum	Katılmıyorum	Katılıyorum	Katılmıyorum	Kararsızım	Katılıyorum	Katılıyorum	Kesinlikle Katılıyorum	Katılmıyorum	Katılmıyorum	Katılıyorum	Katılıyorum	Kesinlikle Katılıyorum	Sıklıkla	Sıklıkla	Bazen	Her Zaman	Sıklıkla
2022-09-06 16:06:33	0	Kadın	21-30 yaş	Bekâr	Üniversite	Hemşire/Sağlık Memuru	Ameliyathane	0-2 yıl	1-5 yıl	Gündüz/Gece dönüşümlü	Katılmadım	Hiç Katılmadım	El hijyeni ile ilgili bilgilerimin yeterli olduğunu düşünüyorum.	Alkol bazlı el dezenfektanı	15-30 saniye	İş yükünün fazla olması, El hijyeni için gerekli malzemelerin eksikliği, Antiseptik solüsyonlar ve sabunların elleri tahriş etmesi, Zaman kısıtlılığı	Katılıyorum	Katılıyorum	Kararsızım	Katılıyorum	Kararsızım	Katılıyorum	Katılıyorum	Kararsızım	Kesinlikle Katılıyorum	Katılıyorum	Kesinlikle Katılıyorum	Katılmıyorum	Kararsızım	Kesinlikle Katılıyorum	Kesinlikle Katılıyorum	Katılıyorum	Katılıyorum	Kararsızım	Katılmıyorum	Kararsızım	Kesinlikle Katılıyorum	Kesinlikle Katılıyorum	Kesinlikle Katılıyorum	Kesinlikle Katılmıyorum	Kesinlikle Katılmıyorum	Kesinlikle Katılıyorum	Katılıyorum	Katılıyorum	Her Zaman	Her Zaman	Çoğu Zaman	Her Zaman	Her Zaman
2022-09-06 16:07:07	0	Erkek	21-30 yaş	Evli	İlkokul/Ortaokul	Temizlik Personeli	Ameliyathane	0-2 yıl	1-5 yıl	Gündüz/Gece dönüşümlü	Konferans	Katıldım	El hijyeni ile ilgili bilgilerimin yeterli olduğunu düşünüyorum.	Su ve sabun	15-30 saniye	El hijyeni için bilgilendirici tabela, afiş, rehberlerin eksikliği	Kesinlikle Katılıyorum	Kesinlikle Katılıyorum	Kesinlikle Katılıyorum	Katılmıyorum	Kesinlikle Katılıyorum	Kesinlikle Katılıyorum	Kesinlikle Katılıyorum	Katılmıyorum	Kesinlikle Katılıyorum	Kesinlikle Katılıyorum	Kesinlikle Katılıyorum	Kesinlikle Katılıyorum	Kesinlikle Katılıyorum	Kesinlikle Katılıyorum	Kesinlikle Katılıyorum	Kesinlikle Katılıyorum	Kesinlikle Katılıyorum	Kesinlikle Katılıyorum	Kesinlikle Katılıyorum	Kararsızım	Kesinlikle Katılıyorum	Kesinlikle Katılıyorum	Kesinlikle Katılıyorum	Kesinlikle Katılıyorum	Kesinlikle Katılıyorum	Kesinlikle Katılıyorum	Kesinlikle Katılıyorum	Kesinlikle Katılıyorum	Çoğu Zaman	Her Zaman	Çoğu Zaman	Bazen	Bazen
2022-09-06 16:13:32	0	Erkek	31-39 yaş	Evli	Üniversite	Hemşire/Sağlık Memuru	Ameliyathane	5 yıl ve üzeri	16 yıl ve üzeri	Gündüz/Gece dönüşümlü	Konferans	Katıldım	El hijyeni ile ilgili bilgilerimin yeterli olduğunu düşünüyorum.	Alkol bazlı el dezenfektanı	15-30 saniye	El hijyeni için gerekli malzemelerin eksikliği, Antiseptik solüsyonlar ve sabunların elleri tahriş etmesi	Katılıyorum	Katılıyorum	Katılıyorum	Katılıyorum	Katılmıyorum	Katılıyorum	Katılıyorum	Katılmıyorum	Katılıyorum	Katılıyorum	Katılıyorum	Katılıyorum	Kesinlikle Katılıyorum	Kesinlikle Katılıyorum	Katılıyorum	Katılmıyorum	Katılmıyorum	Katılmıyorum	Katılmıyorum	Katılıyorum	Katılıyorum	Kesinlikle Katılıyorum	Kesinlikle Katılıyorum	Katılmıyorum	Katılmıyorum	Katılıyorum	Katılıyorum	Katılmıyorum	Sıklıkla	Her Zaman	Her Zaman	Çoğu Zaman	Çoğu Zaman
2022-09-06 16:24:27	0	Erkek	21-30 yaş	Evli	Üniversite	Hemşire/Sağlık Memuru	Ameliyathane	5 yıl ve üzeri	6-10 yıl	Gündüz/Gece dönüşümlü	Konferans	Katıldım	El hijyeni ile ilgili bilgilerimin yeterli olduğunu düşünüyorum.	Su ve sabun	15-30 saniye	İş yükünün fazla olması, El hijyeni için gerekli malzemelerin eksikliği	Kesinlikle Katılıyorum	Katılıyorum	Katılıyorum	Katılıyorum	Katılmıyorum	Katılıyorum	Katılıyorum	Katılmıyorum	Katılıyorum	Kararsızım	Kesinlikle Katılıyorum	Kesinlikle Katılmıyorum	Katılıyorum	Kesinlikle Katılıyorum	Katılıyorum	Kesinlikle Katılmıyorum	Kararsızım	Kesinlikle Katılıyorum	Katılmıyorum	Katılıyorum	Kesinlikle Katılıyorum	Kesinlikle Katılıyorum	Katılıyorum	Kesinlikle Katılmıyorum	Kesinlikle Katılmıyorum	Katılıyorum	Katılıyorum	Kesinlikle Katılıyorum	Sıklıkla	Her Zaman	Çoğu Zaman	Sıklıkla	Her Zaman
2022-09-06 17:05:43	0	Kadın	40-49 yaş	Evli	Lise	Temizlik Personeli	Ameliyathane	5 yıl ve üzeri	16 yıl ve üzeri	Gündüz	Kurum İçi Egitim	Katıldım	El hijyeni ile ilgili bilgilerimin yeterli olduğunu düşünüyorum.	Su ve sabun	15-30 saniye	El hijyeni için bilgilendirici tabela, afiş, rehberlerin eksikliği, Antiseptik solüsyonlar ve sabunların elleri tahriş etmesi, Rol model eksikliği	Kesinlikle Katılıyorum	Katılıyorum	Katılıyorum	Kesinlikle Katılıyorum	Kesinlikle Katılmıyorum	Kesinlikle Katılıyorum	Kesinlikle Katılıyorum	Katılmıyorum	Kesinlikle Katılıyorum	Katılmıyorum	Kesinlikle Katılıyorum	Kesinlikle Katılıyorum	Kesinlikle Katılmıyorum	Kesinlikle Katılıyorum	Kesinlikle Katılıyorum	Kesinlikle Katılmıyorum	Kesinlikle Katılmıyorum	Kesinlikle Katılıyorum	Kesinlikle Katılmıyorum	Katılmıyorum	Katılmıyorum	Kesinlikle Katılıyorum	Kesinlikle Katılıyorum	Kesinlikle Katılmıyorum	Kesinlikle Katılmıyorum	Kesinlikle Katılıyorum	Kesinlikle Katılıyorum	Kesinlikle Katılmıyorum	Her Zaman	Her Zaman	Her Zaman	Her Zaman	Her Zaman
2022-09-06 17:05:46	0	Kadın	21-30 yaş	Bekâr	Üniversite	Hemşire/Sağlık Memuru	Ameliyathane	0-2 yıl	1-5 yıl	Gündüz/Gece dönüşümlü	Kurum İçi Egitim	Katıldım	El hijyeni ile ilgili bilgilerimi geliştirmem gerektiğini düşünüyorum.	Povidon-iyot çözeltileri	15-30 saniye	Antiseptik solüsyonlar ve sabunların elleri tahriş etmesi, Eldiven giymenin el hijyeni için yeterli olması	Katılıyorum	Kesinlikle Katılıyorum	Kararsızım	Kesinlikle Katılıyorum	Kesinlikle Katılmıyorum	Kesinlikle Katılıyorum	Kesinlikle Katılıyorum	Kararsızım	Kesinlikle Katılıyorum	Kesinlikle Katılıyorum	Kesinlikle Katılıyorum	Kararsızım	Kesinlikle Katılıyorum	Katılıyorum	Kesinlikle Katılıyorum	Kesinlikle Katılıyorum	Kesinlikle Katılıyorum	Kesinlikle Katılmıyorum	Kesinlikle Katılıyorum	Kararsızım	Katılıyorum	Kesinlikle Katılıyorum	Kesinlikle Katılıyorum	Kesinlikle Katılmıyorum	Kesinlikle Katılmıyorum	Kesinlikle Katılıyorum	Kesinlikle Katılıyorum	Kesinlikle Katılıyorum	Çoğu Zaman	Her Zaman	Her Zaman	Çoğu Zaman	Her Zaman
2022-09-06 22:18:58	0	Kadın	21-30 yaş	Evli	Yüksek Lisans	Doktor	Ameliyathane	0-2 yıl	1-5 yıl	Gündüz	Katılmadım	Hiç Katılmadım	El hijyeni ile ilgili bilgilerimi geliştirmem gerektiğini düşünüyorum.	Su ve sabun	15-30 saniye	İş yükünün fazla olması, Antiseptik solüsyonlar ve sabunların elleri tahriş etmesi, Zaman kısıtlılığı	Kesinlikle Katılıyorum	Kesinlikle Katılıyorum	Kesinlikle Katılıyorum	Kesinlikle Katılıyorum	Katılmıyorum	Kesinlikle Katılıyorum	Kesinlikle Katılıyorum	Kararsızım	Kesinlikle Katılıyorum	Kesinlikle Katılıyorum	Kesinlikle Katılıyorum	Katılmıyorum	Kesinlikle Katılıyorum	Kesinlikle Katılıyorum	Katılıyorum	Katılmıyorum	Katılmıyorum	Kesinlikle Katılıyorum	Katılmıyorum	Katılıyorum	Katılıyorum	Kesinlikle Katılıyorum	Kesinlikle Katılıyorum	Kesinlikle Katılmıyorum	Kesinlikle Katılmıyorum	Kesinlikle Katılıyorum	Katılmıyorum	Kesinlikle Katılıyorum	Çoğu Zaman	Her Zaman	Çoğu Zaman	Her Zaman	Her Zaman
2022-09-07 11:22:53	0	Kadın	40-49 yaş	Evli	Üniversite	Hemşire/Sağlık Memuru	Ameliyathane	5 yıl ve üzeri	16 yıl ve üzeri	Gündüz/Gece dönüşümlü	Kurum İçi Egitim	Katıldım	El hijyeni ile ilgili bilgilerimin yeterli olduğunu düşünüyorum.	Povidon-iyot çözeltileri	15-30 saniye	İş yükünün fazla olması, Antiseptik solüsyonlar ve sabunların elleri tahriş etmesi, Zaman kısıtlılığı	Katılıyorum	Katılıyorum	Katılıyorum	Katılıyorum	Katılmıyorum	Katılıyorum	Kesinlikle Katılıyorum	Kesinlikle Katılmıyorum	Kesinlikle Katılıyorum	Katılıyorum	Kesinlikle Katılıyorum	Katılıyorum	Katılıyorum	Katılıyorum	Kesinlikle Katılıyorum	Katılıyorum	Katılıyorum	Katılıyorum	Katılmıyorum	Katılmıyorum	Katılıyorum	Katılıyorum	Kesinlikle Katılıyorum	Katılmıyorum	Katılmıyorum	Kesinlikle Katılıyorum	Katılıyorum	Kesinlikle Katılıyorum	Her Zaman	Her Zaman	Her Zaman	Her Zaman	Her Zaman
2022-09-22 10:29:39	0	Erkek	40-49 yaş	Bekâr	Doktora	Doktor	Ameliyathane	3-4 yıl	16 yıl ve üzeri	Gündüz/Gece dönüşümlü	Sempozyum	Katıldım	El hijyeni ile ilgili bilgilerimi geliştirmem gerektiğini düşünüyorum.	Alkol bazlı el dezenfektanı	15 saniyeden az	İş yükünün fazla olması, Antiseptik solüsyonlar ve sabunların elleri tahriş etmesi, Zaman kısıtlılığı	Katılıyorum	Katılıyorum	Katılıyorum	Katılıyorum	Kararsızım	Kesinlikle Katılıyorum	Kesinlikle Katılıyorum	Kararsızım	Kesinlikle Katılıyorum	Katılıyorum	Kesinlikle Katılıyorum	Katılıyorum	Katılıyorum	Katılıyorum	Kararsızım	Kararsızım	Kararsızım	Katılmıyorum	Katılmıyorum	Kararsızım	Katılıyorum	Katılıyorum	Kesinlikle Katılıyorum	Katılmıyorum	Katılmıyorum	Kesinlikle Katılıyorum	Katılıyorum	Katılıyorum	Çoğu Zaman	Çoğu Zaman	Çoğu Zaman	Çoğu Zaman	Çoğu Zaman
2022-09-22 10:39:00	0	Kadın	31-39 yaş	Evli	Yüksek Lisans	Doktor	Cerrahi Klinikleri	3-4 yıl	6-10 yıl	Gündüz	Kurum İçi Egitim	Katıldım	El hijyeni ile ilgili bilgilerimin yeterli olduğunu düşünüyorum.	Su ve sabun	15-30 saniye	İş yükünün fazla olması, Antiseptik solüsyonlar ve sabunların elleri tahriş etmesi, Zaman kısıtlılığı, Rol model eksikliği	Kesinlikle Katılıyorum	Kesinlikle Katılıyorum	Katılıyorum	Kesinlikle Katılıyorum	Katılıyorum	Kesinlikle Katılıyorum	Kesinlikle Katılıyorum	Katılıyorum	Kesinlikle Katılıyorum	Kesinlikle Katılıyorum	Kesinlikle Katılıyorum	Kararsızım	Kesinlikle Katılıyorum	Kesinlikle Katılıyorum	Katılıyorum	Katılıyorum	Katılıyorum	Katılıyorum	Katılmıyorum	Katılıyorum	Katılıyorum	Kesinlikle Katılıyorum	Kesinlikle Katılıyorum	Kesinlikle Katılmıyorum	Kesinlikle Katılmıyorum	Kesinlikle Katılıyorum	Katılmıyorum	Kesinlikle Katılıyorum	Çoğu Zaman	Her Zaman	Her Zaman	Çoğu Zaman	Her Zaman
2022-09-22 11:35:40	0	Kadın	50 ve üzeri yaş	Bekâr	Yüksek Lisans	Doktor	Ameliyathane	0-2 yıl	16 yıl ve üzeri	Gündüz	Konferans	Katıldım	El hijyeni ile ilgili bilgilerimin yeterli olduğunu düşünüyorum.	Su ve sabun	15-30 saniye	Eldiven giymenin el hijyeni için yeterli olması	Kesinlikle Katılıyorum	Kesinlikle Katılıyorum	Kesinlikle Katılıyorum	Kesinlikle Katılıyorum	Katılıyorum	Kesinlikle Katılıyorum	Kesinlikle Katılıyorum	Katılıyorum	Kesinlikle Katılıyorum	Kararsızım	Kesinlikle Katılıyorum	Kararsızım	Katılıyorum	Katılıyorum	Katılıyorum	Katılmıyorum	Katılmıyorum	Katılıyorum	Katılmıyorum	Katılıyorum	Katılıyorum	Katılıyorum	Katılıyorum	Katılmıyorum	Katılmıyorum	Kesinlikle Katılıyorum	Katılmıyorum	Kararsızım	Çoğu Zaman	Her Zaman	Sıklıkla	Çoğu Zaman	Her Zaman
2022-09-22 11:43:34	0	Kadın	31-39 yaş	Evli	Üniversite	Hemşire/Sağlık Memuru	Cerrahi Klinikleri	3-4 yıl	16 yıl ve üzeri	Gündüz/Gece dönüşümlü	Katılmadım	Katıldım	El hijyeni ile ilgili bilgilerimin yeterli olduğunu düşünüyorum.	Su ve sabun	15 saniyeden az	El hijyeni için gerekli malzemelerin eksikliği	Kararsızım	Katılmıyorum	Katılmıyorum	Katılmıyorum	Katılmıyorum	Kararsızım	Kararsızım	Kararsızım	Kararsızım	Kararsızım	Kararsızım	Kararsızım	Kararsızım	Kararsızım	Kararsızım	Kararsızım	Kararsızım	Kararsızım	Kararsızım	Kararsızım	Kararsızım	Kararsızım	Katılıyorum	Katılıyorum	Katılıyorum	Katılıyorum	Katılıyorum	Kararsızım	Bazen	Sıklıkla	Bazen	Çoğu Zaman	Çoğu Zaman
2022-09-22 12:01:01	0	Kadın	31-39 yaş	Evli	Yüksek Lisans	Doktor	Ameliyathane	5 yıl ve üzeri	6-10 yıl	Gündüz/Gece dönüşümlü	Katılmadım	Hiç Katılmadım	El hijyeni ile ilgili bilgilerimin yeterli olduğunu düşünüyorum.	Su ve sabun	15-30 saniye	El hijyeni için gerekli malzemelerin eksikliği	Katılıyorum	Katılıyorum	Katılmıyorum	Kesinlikle Katılıyorum	Katılıyorum	Katılıyorum	Kesinlikle Katılıyorum	Kararsızım	Kesinlikle Katılıyorum	Katılıyorum	Kesinlikle Katılıyorum	Katılmıyorum	Katılıyorum	Katılıyorum	Katılıyorum	Kesinlikle Katılıyorum	Katılıyorum	Katılıyorum	Kesinlikle Katılmıyorum	Katılmıyorum	Kesinlikle Katılıyorum	Kesinlikle Katılıyorum	Kesinlikle Katılıyorum	Kesinlikle Katılmıyorum	Kesinlikle Katılmıyorum	Kesinlikle Katılıyorum	Katılıyorum	Kesinlikle Katılıyorum	Sıklıkla	Her Zaman	Çoğu Zaman	Çoğu Zaman	Çoğu Zaman
2022-09-22 12:44:57	0	Erkek	40-49 yaş	Evli	Doktora	Doktor	YBÜ	3-4 yıl	16 yıl ve üzeri	Gündüz/Gece dönüşümlü	Konferans	Katıldım	El hijyeni ile ilgili bilgilerimi geliştirmem gerektiğini düşünüyorum.	Su ve sabun	15-30 saniye	El hijyeni için bilgilendirici tabela, afiş, rehberlerin eksikliği, Antiseptik solüsyonlar ve sabunların elleri tahriş etmesi, El hijyeni ile ilgili yeterli bilgi sahibi olmamam	Katılıyorum	Kararsızım	Katılmıyorum	Katılıyorum	Katılmıyorum	Kesinlikle Katılıyorum	Kesinlikle Katılıyorum	Katılmıyorum	Kesinlikle Katılıyorum	Katılmıyorum	Kesinlikle Katılıyorum	Katılmıyorum	Katılıyorum	Kesinlikle Katılıyorum	Katılıyorum	Katılmıyorum	Katılmıyorum	Katılmıyorum	Katılmıyorum	Kararsızım	Katılıyorum	Kesinlikle Katılıyorum	Kesinlikle Katılıyorum	Kesinlikle Katılmıyorum	Kesinlikle Katılmıyorum	Kesinlikle Katılıyorum	Katılıyorum	Kesinlikle Katılmıyorum	Bazen	Her Zaman	Sıklıkla	Her Zaman	Her Zaman
2022-09-22 13:56:33	0	Kadın	40-49 yaş	Evli	Üniversite	Hemşire/Sağlık Memuru	Ameliyathane	5 yıl ve üzeri	16 yıl ve üzeri	Gündüz/Gece dönüşümlü	Kurum İçi Egitim	Katıldım	El hijyeni ile ilgili bilgilerimin yeterli olduğunu düşünüyorum.	Povidon-iyot çözeltileri	30 saniyeden fazla	İş yükünün fazla olması, Antiseptik solüsyonlar ve sabunların elleri tahriş etmesi, Zaman kısıtlılığı	Kesinlikle Katılıyorum	Kesinlikle Katılıyorum	Katılıyorum	Katılıyorum	Katılmıyorum	Kesinlikle Katılıyorum	Kesinlikle Katılıyorum	Katılmıyorum	Katılıyorum	Kararsızım	Katılıyorum	Katılıyorum	Katılıyorum	Katılıyorum	Kesinlikle Katılıyorum	Katılmıyorum	Katılmıyorum	Katılmıyorum	Katılıyorum	Katılmıyorum	Kararsızım	Katılıyorum	Kesinlikle Katılıyorum	Kesinlikle Katılmıyorum	Kesinlikle Katılmıyorum	Kesinlikle Katılıyorum	Katılmıyorum	Katılmıyorum	Sıklıkla	Her Zaman	Çoğu Zaman	Sıklıkla	Her Zaman
2022-09-22 17:05:07	0	Erkek	40-49 yaş	Evli	Lise	Temizlik Personeli	Ameliyathane	5 yıl ve üzeri	16 yıl ve üzeri	Gündüz	Kurum İçi Egitim	Katıldım	El hijyeni ile ilgili bilgilerimi geliştirmem gerektiğini düşünüyorum.	Su ve sabun	15-30 saniye	İş yükünün fazla olması	Katılıyorum	Katılıyorum	Kararsızım	Kararsızım	Kararsızım	Katılıyorum	Kesinlikle Katılıyorum	Katılıyorum	Katılıyorum	Katılıyorum	Kesinlikle Katılıyorum	Kesinlikle Katılmıyorum	Katılıyorum	Katılıyorum	Kararsızım	Katılıyorum	Katılıyorum	Katılıyorum	Katılıyorum	Kesinlikle Katılmıyorum	Katılmıyorum	Kesinlikle Katılıyorum	Kesinlikle Katılıyorum	Kesinlikle Katılmıyorum	Kesinlikle Katılmıyorum	Kesinlikle Katılıyorum	Katılıyorum	Kesinlikle Katılıyorum	Sıklıkla	Sıklıkla	Sıklıkla	Çoğu Zaman	Çoğu Zaman
2022-09-22 20:26:45	0	Erkek	21-30 yaş	Bekâr	Yüksek Lisans	Doktor	Ameliyathane	3-4 yıl	1-5 yıl	Gündüz	Katılmadım	Hiç Katılmadım	El hijyeni ile ilgili bilgilerimin yeterli olduğunu düşünüyorum.	Alkol bazlı el dezenfektanı	15-30 saniye	Zaman kısıtlılığı	Katılıyorum	Katılmıyorum	Kararsızım	Katılmıyorum	Katılıyorum	Kesinlikle Katılıyorum	Katılıyorum	Kararsızım	Kesinlikle Katılıyorum	Katılmıyorum	Katılıyorum	Kararsızım	Katılıyorum	Kesinlikle Katılıyorum	Katılıyorum	Katılmıyorum	Katılmıyorum	Kararsızım	Kesinlikle Katılıyorum	Kararsızım	Katılmıyorum	Kesinlikle Katılıyorum	Kesinlikle Katılıyorum	Katılmıyorum	Kesinlikle Katılmıyorum	Katılıyorum	Kesinlikle Katılıyorum	Katılıyorum	Sıklıkla	Her Zaman	Bazen	Çoğu Zaman	Her Zaman
2022-09-22 20:29:33	0	Erkek	21-30 yaş	Bekâr	Yüksekokul	Hemşire/Sağlık Memuru	Ameliyathane	5 yıl ve üzeri	6-10 yıl	Gündüz/Gece dönüşümlü	Tıp Fakültesinde Ders Aldık	Katıldım	El hijyeni ile ilgili bilgilerimin yeterli olduğunu düşünüyorum.	Su ve sabun	30 saniyeden fazla	İş yükünün fazla olması	Katılıyorum	Katılıyorum	Katılıyorum	Katılıyorum	Kararsızım	Katılıyorum	Katılıyorum	Kararsızım	Katılıyorum	Katılmıyorum	Kesinlikle Katılıyorum	Katılmıyorum	Katılmıyorum	Katılıyorum	Katılıyorum	Katılıyorum	Katılıyorum	Kararsızım	Katılıyorum	Kararsızım	Kararsızım	Kesinlikle Katılıyorum	Kesinlikle Katılıyorum	Katılmıyorum	Kesinlikle Katılmıyorum	Katılıyorum	Katılıyorum	Katılıyorum	Sıklıkla	Sıklıkla	Sıklıkla	Sıklıkla	Sıklıkla
2022-09-22 20:29:59	0	Erkek	40-49 yaş	Evli	Yüksek Lisans	Doktor	Ameliyathane	5 yıl ve üzeri	16 yıl ve üzeri	Gündüz/Gece dönüşümlü	Konferans	Katıldım	El hijyeni ile ilgili bilgilerimin yeterli olduğunu düşünüyorum.	Su ve sabun	15-30 saniye	Zaman kısıtlılığı	Kesinlikle Katılıyorum	Kesinlikle Katılıyorum	Kesinlikle Katılıyorum	Katılıyorum	Katılmıyorum	Kesinlikle Katılıyorum	Kesinlikle Katılıyorum	Katılmıyorum	Kesinlikle Katılıyorum	Kesinlikle Katılmıyorum	Kesinlikle Katılıyorum	Katılıyorum	Katılıyorum	Katılıyorum	Katılıyorum	Katılıyorum	Katılıyorum	Katılıyorum	Kesinlikle Katılmıyorum	Kararsızım	Katılmıyorum	Kesinlikle Katılıyorum	Kesinlikle Katılıyorum	Kesinlikle Katılmıyorum	Kesinlikle Katılmıyorum	Kesinlikle Katılıyorum	Katılmıyorum	Katılıyorum	Sıklıkla	Her Zaman	Çoğu Zaman	Sıklıkla	Her Zaman
2022-09-22 20:34:31	0	Kadın	21-30 yaş	Bekâr	Yüksek Lisans	Doktor	Ameliyathane	0-2 yıl	1-5 yıl	Gündüz/Gece dönüşümlü	Konferans	Katıldım	El hijyeni ile ilgili bilgilerimin yeterli olduğunu düşünüyorum.	Alkol bazlı el dezenfektanı	30 saniyeden fazla	İş yükünün fazla olması, Antiseptik solüsyonlar ve sabunların elleri tahriş etmesi, Zaman kısıtlılığı, Rol model eksikliği	Kesinlikle Katılmıyorum	Kararsızım	Katılıyorum	Katılıyorum	Kesinlikle Katılmıyorum	Kesinlikle Katılıyorum	Kesinlikle Katılıyorum	Kesinlikle Katılmıyorum	Kesinlikle Katılıyorum	Kesinlikle Katılıyorum	Kesinlikle Katılıyorum	Katılmıyorum	Kesinlikle Katılıyorum	Katılıyorum	Katılıyorum	Kesinlikle Katılmıyorum	Kesinlikle Katılmıyorum	Kesinlikle Katılmıyorum	Kesinlikle Katılmıyorum	Kesinlikle Katılmıyorum	Kararsızım	Kesinlikle Katılıyorum	Kesinlikle Katılıyorum	Kesinlikle Katılmıyorum	Kesinlikle Katılmıyorum	Kesinlikle Katılıyorum	Kesinlikle Katılıyorum	Kesinlikle Katılıyorum	Her Zaman	Her Zaman	Çoğu Zaman	Her Zaman	Her Zaman
2022-09-22 20:35:58	0	Kadın	21-30 yaş	Evli	Yüksekokul	Hemşire/Sağlık Memuru	Ameliyathane	5 yıl ve üzeri	6-10 yıl	Gündüz/Gece dönüşümlü	Konferans	Katıldım	El hijyeni ile ilgili bilgilerimin yeterli olduğunu düşünüyorum.	Klorkeksidin	30 saniyeden fazla	İş yükünün fazla olması, El hijyeni için gerekli malzemelerin eksikliği, Antiseptik solüsyonlar ve sabunların elleri tahriş etmesi	Kesinlikle Katılıyorum	Kesinlikle Katılıyorum	Katılıyorum	Katılmıyorum	Kararsızım	Kesinlikle Katılıyorum	Kesinlikle Katılıyorum	Katılmıyorum	Kesinlikle Katılıyorum	Katılıyorum	Kesinlikle Katılıyorum	Kararsızım	Katılıyorum	Katılıyorum	Kararsızım	Katılıyorum	Katılıyorum	Katılıyorum	Katılmıyorum	Kararsızım	Katılıyorum	Kesinlikle Katılıyorum	Kesinlikle Katılıyorum	Kesinlikle Katılmıyorum	Kesinlikle Katılmıyorum	Kesinlikle Katılıyorum	Katılmıyorum	Katılmıyorum	Çoğu Zaman	Her Zaman	Her Zaman	Çoğu Zaman	Her Zaman
2022-09-22 20:40:17	0	Erkek	21-30 yaş	Evli	Yüksek Lisans	Doktor	Ameliyathane	0-2 yıl	1-5 yıl	Gündüz/Gece dönüşümlü	Konferans	Hiç Katılmadım	El hijyeni ile ilgili bilgilerimi geliştirmem gerektiğini düşünüyorum.	Su ve sabun	15-30 saniye	El hijyeni için bilgilendirici tabela, afiş, rehberlerin eksikliği	Kararsızım	Katılıyorum	Katılıyorum	Katılıyorum	Katılmıyorum	Kesinlikle Katılıyorum	Kesinlikle Katılıyorum	Katılmıyorum	Katılıyorum	Kararsızım	Kesinlikle Katılıyorum	Kararsızım	Katılıyorum	Katılıyorum	Katılıyorum	Katılıyorum	Katılıyorum	Kararsızım	Katılmıyorum	Kararsızım	Kararsızım	Katılıyorum	Kesinlikle Katılıyorum	Katılmıyorum	Katılmıyorum	Kesinlikle Katılıyorum	Katılıyorum	Katılıyorum	Her Zaman	Her Zaman	Her Zaman	Her Zaman	Her Zaman
2022-09-22 20:42:32	0	Erkek	31-39 yaş	Evli	Yüksek Lisans	Doktor	Ameliyathane	5 yıl ve üzeri	11-15 yıl	Gündüz	Sempozyum	Katıldım	El hijyeni ile ilgili bilgilerimin yeterli olduğunu düşünüyorum.	Su ve sabun	15-30 saniye	Antiseptik solüsyonlar ve sabunların elleri tahriş etmesi	Katılıyorum	Katılıyorum	Katılıyorum	Katılıyorum	Katılmıyorum	Kararsızım	Katılıyorum	Kararsızım	Katılıyorum	Katılıyorum	Katılıyorum	Kararsızım	Kararsızım	Katılıyorum	Kararsızım	Katılıyorum	Katılıyorum	Katılmıyorum	Katılmıyorum	Katılmıyorum	Katılıyorum	Katılıyorum	Katılıyorum	Katılmıyorum	Katılmıyorum	Katılıyorum	Katılıyorum	Katılıyorum	Sıklıkla	Her Zaman	Çoğu Zaman	Her Zaman	Her Zaman
2022-09-22 20:52:45	0	Erkek	50 ve üzeri yaş	Evli	Üniversite	Hemşire/Sağlık Memuru	Ameliyathane	5 yıl ve üzeri	16 yıl ve üzeri	Gündüz/Gece dönüşümlü	Konferans	Katıldım	El hijyeni ile ilgili bilgilerimin yeterli olduğunu düşünüyorum.	Su ve sabun	15-30 saniye	Rol model eksikliği	Kesinlikle Katılıyorum	Kesinlikle Katılıyorum	Katılıyorum	Katılmıyorum	Katılmıyorum	Katılmıyorum	Katılıyorum	Katılıyorum	Katılıyorum	Katılıyorum	Katılıyorum	Katılıyorum	Kesinlikle Katılıyorum	Katılıyorum	Katılıyorum	Katılıyorum	Katılıyorum	Katılıyorum	Katılıyorum	Katılmıyorum	Katılmıyorum	Katılıyorum	Katılıyorum	Katılmıyorum	Kesinlikle Katılmıyorum	Katılmıyorum	Katılmıyorum	Katılmıyorum	Sıklıkla	Her Zaman	Sıklıkla	Sıklıkla	Çoğu Zaman
2022-09-22 20:56:44	0	Erkek	31-39 yaş	Evli	Yüksek Lisans	Doktor	Cerrahi Klinikleri	3-4 yıl	1-5 yıl	Gündüz/Gece dönüşümlü	Katılmadım	Hiç Katılmadım	El hijyeni ile ilgili bilgilerimin yeterli olduğunu düşünüyorum.	Su ve sabun	15-30 saniye	İş yükünün fazla olması, Zaman kısıtlılığı	Kesinlikle Katılıyorum	Kesinlikle Katılıyorum	Kararsızım	Kesinlikle Katılıyorum	Kesinlikle Katılmıyorum	Kesinlikle Katılıyorum	Kesinlikle Katılıyorum	Katılmıyorum	Katılıyorum	Katılmıyorum	Kesinlikle Katılıyorum	Kararsızım	Katılıyorum	Katılıyorum	Katılıyorum	Katılmıyorum	Katılmıyorum	Katılıyorum	Katılmıyorum	Kararsızım	Katılıyorum	Katılıyorum	Katılıyorum	Katılmıyorum	Katılmıyorum	Katılıyorum	Katılıyorum	Katılıyorum	Bazen	Her Zaman	Çoğu Zaman	Bazen	Her Zaman
2022-09-22 21:04:19	0	Erkek	40-49 yaş	Evli	Üniversite	Hemşire/Sağlık Memuru	Ameliyathane	5 yıl ve üzeri	16 yıl ve üzeri	Gündüz/Gece dönüşümlü	Kurum İçi Egitim	Katıldım	El hijyeni ile ilgili bilgilerimin yeterli olduğunu düşünüyorum.	Klorkeksidin	30 saniyeden fazla	İş yükünün fazla olması, Antiseptik solüsyonlar ve sabunların elleri tahriş etmesi, Zaman kısıtlılığı, Eldiven giymenin el hijyeni için yeterli olması	Kesinlikle Katılıyorum	Kesinlikle Katılıyorum	Kesinlikle Katılıyorum	Kesinlikle Katılıyorum	Kesinlikle Katılmıyorum	Kesinlikle Katılmıyorum	Kesinlikle Katılmıyorum	Kesinlikle Katılmıyorum	Kesinlikle Katılıyorum	Katılıyorum	Kesinlikle Katılıyorum	Kararsızım	Kesinlikle Katılıyorum	Kesinlikle Katılıyorum	Kesinlikle Katılıyorum	Katılmıyorum	Katılmıyorum	Katılıyorum	Kesinlikle Katılmıyorum	Kesinlikle Katılmıyorum	Kesinlikle Katılmıyorum	Kesinlikle Katılıyorum	Kesinlikle Katılıyorum	Katılmıyorum	Kesinlikle Katılmıyorum	Kesinlikle Katılıyorum	Katılmıyorum	Katılmıyorum	Her Zaman	Her Zaman	Her Zaman	Her Zaman	Her Zaman
2022-09-23 07:56:51	0	Kadın	40-49 yaş	Evli	Doktora	Doktor	Cerrahi Klinikleri	3-4 yıl	11-15 yıl	Gündüz/Gece dönüşümlü	Konferans	Katıldım	El hijyeni ile ilgili bilgilerimin yeterli olduğunu düşünüyorum.	Alkol bazlı el dezenfektanı	30 saniyeden fazla	İş yükünün fazla olması, Antiseptik solüsyonlar ve sabunların elleri tahriş etmesi, Zaman kısıtlılığı	Kesinlikle Katılıyorum	Kesinlikle Katılıyorum	Katılıyorum	Kesinlikle Katılıyorum	Katılıyorum	Katılıyorum	Katılıyorum	Katılıyorum	Kesinlikle Katılıyorum	Katılmıyorum	Kesinlikle Katılıyorum	Katılıyorum	Katılıyorum	Katılıyorum	Katılıyorum	Katılmıyorum	Katılmıyorum	Katılmıyorum	Kesinlikle Katılmıyorum	Kararsızım	Katılıyorum	Kesinlikle Katılıyorum	Kesinlikle Katılıyorum	Kesinlikle Katılmıyorum	Kesinlikle Katılmıyorum	Kesinlikle Katılıyorum	Katılıyorum	Katılmıyorum	Çoğu Zaman	Her Zaman	Çoğu Zaman	Çoğu Zaman	Her Zaman
2022-09-23 08:32:51	0	Kadın	31-39 yaş	Bekâr	Lise	Hemşire/Sağlık Memuru	YBÜ	0-2 yıl	16 yıl ve üzeri	Gündüz	Konferans	Katıldım	El hijyeni ile ilgili bilgilerimin yeterli olduğunu düşünüyorum.	Povidon-iyot çözeltileri	30 saniyeden fazla	El hijyeni için gerekli malzemelerin eksikliği, El hijyeni için bilgilendirici tabela, afiş, rehberlerin eksikliği, Zaman kısıtlılığı, Rol model eksikliği	Kesinlikle Katılıyorum	Katılmıyorum	Katılıyorum	Kesinlikle Katılıyorum	Kesinlikle Katılmıyorum	Kesinlikle Katılıyorum	Kesinlikle Katılıyorum	Kesinlikle Katılmıyorum	Kesinlikle Katılıyorum	Katılmıyorum	Kesinlikle Katılıyorum	Katılıyorum	Kesinlikle Katılıyorum	Katılıyorum	Kesinlikle Katılıyorum	Katılmıyorum	Katılmıyorum	Katılmıyorum	Katılmıyorum	Katılmıyorum	Katılıyorum	Kesinlikle Katılıyorum	Kesinlikle Katılıyorum	Kesinlikle Katılmıyorum	Kesinlikle Katılmıyorum	Kesinlikle Katılıyorum	Kararsızım	Kesinlikle Katılmıyorum	Her Zaman	Her Zaman	Her Zaman	Her Zaman	Her Zaman
2022-09-23 09:21:06	0	Kadın	31-39 yaş	Evli	Doktora	Doktor	Ameliyathane	5 yıl ve üzeri	6-10 yıl	Gündüz/Gece dönüşümlü	Kurum İçi Egitim	Katıldım	El hijyeni ile ilgili bilgilerimi geliştirmem gerektiğini düşünüyorum.	Su ve sabun	15-30 saniye	El hijyeni için gerekli malzemelerin eksikliği, Antiseptik solüsyonlar ve sabunların elleri tahriş etmesi, Zaman kısıtlılığı, Eldiven giymenin el hijyeni için yeterli olması	Kesinlikle Katılmıyorum	Kesinlikle Katılmıyorum	Kararsızım	Katılmıyorum	Kesinlikle Katılmıyorum	Kesinlikle Katılmıyorum	Kesinlikle Katılmıyorum	Katılmıyorum	Kesinlikle Katılmıyorum	Kesinlikle Katılmıyorum	Kesinlikle Katılıyorum	Kesinlikle Katılmıyorum	Kesinlikle Katılıyorum	Kesinlikle Katılıyorum	Kesinlikle Katılıyorum	Katılmıyorum	Katılmıyorum	Katılıyorum	Kesinlikle Katılmıyorum	Katılmıyorum	Kararsızım	Kesinlikle Katılıyorum	Kesinlikle Katılıyorum	Kesinlikle Katılmıyorum	Kesinlikle Katılmıyorum	Kesinlikle Katılıyorum	Katılmıyorum	Kesinlikle Katılmıyorum	Çoğu Zaman	Her Zaman	Her Zaman	Her Zaman	Her Zaman
2022-09-23 10:19:50	0	Erkek	21-30 yaş	Bekâr	Yüksekokul	Hemşire/Sağlık Memuru	Ameliyathane	3-4 yıl	1-5 yıl	Gündüz/Gece dönüşümlü	Kurs	Katıldım	El hijyeni ile ilgili bilgilerimin yeterli olduğunu düşünüyorum.	Su ve sabun	30 saniyeden fazla	İş yükünün fazla olması, El hijyeni için gerekli malzemelerin eksikliği, Antiseptik solüsyonlar ve sabunların elleri tahriş etmesi	Kesinlikle Katılıyorum	Kesinlikle Katılıyorum	Kesinlikle Katılıyorum	Kesinlikle Katılıyorum	Kesinlikle Katılmıyorum	Kesinlikle Katılıyorum	Kesinlikle Katılıyorum	Katılmıyorum	Kesinlikle Katılıyorum	Kesinlikle Katılıyorum	Kesinlikle Katılıyorum	Kararsızım	Kesinlikle Katılıyorum	Kesinlikle Katılıyorum	Kesinlikle Katılıyorum	Kesinlikle Katılıyorum	Kesinlikle Katılıyorum	Katılmıyorum	Katılıyorum	Kararsızım	Katılıyorum	Katılıyorum	Katılıyorum	Katılıyorum	Kesinlikle Katılmıyorum	Kesinlikle Katılıyorum	Kesinlikle Katılıyorum	Kesinlikle Katılıyorum	Her Zaman	Her Zaman	Her Zaman	Her Zaman	Her Zaman
2022-09-23 10:44:01	0	Erkek	40-49 yaş	Evli	Doktora	Doktor	Cerrahi Klinikleri	3-4 yıl	16 yıl ve üzeri	Gündüz/Gece dönüşümlü	Kurum İçi Egitim	Katıldım	El hijyeni ile ilgili bilgilerimin yeterli olduğunu düşünüyorum.	Su ve sabun	15-30 saniye	İş yükünün fazla olması, El hijyeni için gerekli malzemelerin eksikliği, El hijyeni için bilgilendirici tabela, afiş, rehberlerin eksikliği, Antiseptik solüsyonlar ve sabunların elleri tahriş etmesi, Zaman kısıtlılığı	Kesinlikle Katılıyorum	Kesinlikle Katılıyorum	Katılıyorum	Kesinlikle Katılıyorum	Kesinlikle Katılmıyorum	Katılıyorum	Kesinlikle Katılıyorum	Katılmıyorum	Kesinlikle Katılıyorum	Kesinlikle Katılıyorum	Kesinlikle Katılıyorum	Kesinlikle Katılıyorum	Kesinlikle Katılıyorum	Kesinlikle Katılıyorum	Kesinlikle Katılıyorum	Kararsızım	Kararsızım	Katılmıyorum	Katılmıyorum	Kararsızım	Katılmıyorum	Kesinlikle Katılıyorum	Kesinlikle Katılıyorum	Katılmıyorum	Kesinlikle Katılmıyorum	Kesinlikle Katılıyorum	Katılmıyorum	Katılıyorum	Her Zaman	Her Zaman	Çoğu Zaman	Her Zaman	Her Zaman
2022-09-23 10:48:47	0	Kadın	31-39 yaş	Evli	Üniversite	Hemşire/Sağlık Memuru	Ameliyathane	5 yıl ve üzeri	16 yıl ve üzeri	Gündüz	Kurum İçi Egitim	Katıldım	El hijyeni ile ilgili bilgilerimin yeterli olduğunu düşünüyorum.	Klorkeksidin	15-30 saniye	İş yükünün fazla olması, El hijyeni için gerekli malzemelerin eksikliği, Antiseptik solüsyonlar ve sabunların elleri tahriş etmesi, Zaman kısıtlılığı, Eldiven giymenin el hijyeni için yeterli olması	Katılıyorum	Katılıyorum	Katılıyorum	Katılıyorum	Katılmıyorum	Katılıyorum	Katılıyorum	Katılmıyorum	Katılıyorum	Katılıyorum	Katılıyorum	Katılıyorum	Katılıyorum	Katılıyorum	Katılıyorum	Katılıyorum	Kararsızım	Katılıyorum	Katılmıyorum	Kararsızım	Katılmıyorum	Katılıyorum	Katılıyorum	Katılmıyorum	Kesinlikle Katılmıyorum	Katılıyorum	Kararsızım	Katılmıyorum	Sıklıkla	Her Zaman	Her Zaman	Her Zaman	Her Zaman
2022-09-23 11:09:32	0	Kadın	40-49 yaş	Evli	Üniversite	Hemşire/Sağlık Memuru	Ameliyathane	5 yıl ve üzeri	16 yıl ve üzeri	Gündüz/Gece dönüşümlü	Kurum İçi Egitim	Katıldım	El hijyeni ile ilgili bilgilerimin yeterli olduğunu düşünüyorum.	Su ve sabun	15-30 saniye	İş yükünün fazla olması, El hijyeni için gerekli malzemelerin eksikliği, El hijyeni için bilgilendirici tabela, afiş, rehberlerin eksikliği, Antiseptik solüsyonlar ve sabunların elleri tahriş etmesi, Zaman kısıtlılığı, Rol model eksikliği	Katılıyorum	Katılıyorum	Katılıyorum	Katılıyorum	Kararsızım	Katılıyorum	Katılıyorum	Katılıyorum	Katılıyorum	Katılmıyorum	Katılıyorum	Kararsızım	Katılıyorum	Katılıyorum	Katılıyorum	Katılıyorum	Katılıyorum	Katılıyorum	Katılmıyorum	Katılıyorum	Katılıyorum	Katılıyorum	Kesinlikle Katılıyorum	Kesinlikle Katılmıyorum	Kesinlikle Katılmıyorum	Kesinlikle Katılıyorum	Kararsızım	Katılmıyorum	Sıklıkla	Her Zaman	Çoğu Zaman	Çoğu Zaman	Her Zaman
2022-09-23 12:27:29	0	Kadın	31-39 yaş	Evli	Yüksekokul	Hemşire/Sağlık Memuru	Ameliyathane	3-4 yıl	1-5 yıl	Gündüz	Konferans	Katıldım	El hijyeni ile ilgili bilgilerimin yeterli olduğunu düşünüyorum.	Su ve sabun	30 saniyeden fazla	El hijyeni için gerekli malzemelerin eksikliği	Kesinlikle Katılıyorum	Kesinlikle Katılıyorum	Kesinlikle Katılıyorum	Kesinlikle Katılıyorum	Kesinlikle Katılmıyorum	Kesinlikle Katılıyorum	Kesinlikle Katılıyorum	Kesinlikle Katılmıyorum	Kesinlikle Katılıyorum	Katılmıyorum	Kesinlikle Katılıyorum	Katılıyorum	Kesinlikle Katılıyorum	Kesinlikle Katılıyorum	Katılıyorum	Kesinlikle Katılmıyorum	Kesinlikle Katılmıyorum	Kararsızım	Kesinlikle Katılmıyorum	Kesinlikle Katılmıyorum	Kesinlikle Katılmıyorum	Kesinlikle Katılıyorum	Kesinlikle Katılıyorum	Kesinlikle Katılmıyorum	Kesinlikle Katılmıyorum	Kesinlikle Katılıyorum	Kesinlikle Katılıyorum	Kesinlikle Katılıyorum	Her Zaman	Her Zaman	Her Zaman	Her Zaman	Her Zaman
2022-09-23 12:27:33	0	Kadın	21-30 yaş	Bekâr	Yüksekokul	Hemşire/Sağlık Memuru	Ameliyathane	0-2 yıl	1-5 yıl	Gündüz/Gece dönüşümlü	Konferans	Hiç Katılmadım	El hijyeni ile ilgili bilgilerimin yeterli olduğunu düşünüyorum.	Su ve sabun	15 saniyeden az	El hijyeni için gerekli malzemelerin eksikliği	Kesinlikle Katılıyorum	Katılıyorum	Katılmıyorum	Kararsızım	Katılıyorum	Kesinlikle Katılmıyorum	Kararsızım	Katılıyorum	Kesinlikle Katılıyorum	Katılıyorum	Kesinlikle Katılıyorum	Kesinlikle Katılıyorum	Katılıyorum	Kesinlikle Katılıyorum	Kesinlikle Katılmıyorum	Kararsızım	Kararsızım	Kesinlikle Katılıyorum	Kesinlikle Katılıyorum	Kesinlikle Katılmıyorum	Kararsızım	Kesinlikle Katılıyorum	Kesinlikle Katılıyorum	Kesinlikle Katılmıyorum	Kesinlikle Katılmıyorum	Kesinlikle Katılmıyorum	Kararsızım	Kesinlikle Katılıyorum	Çoğu Zaman	Her Zaman	Her Zaman	Çoğu Zaman	Her Zaman
2022-09-23 12:29:36	0	Kadın	40-49 yaş	Evli	Üniversite	Hemşire/Sağlık Memuru	Ameliyathane	3-4 yıl	16 yıl ve üzeri	Gündüz	Kurum İçi Egitim	Katıldım	El hijyeni ile ilgili bilgilerimin yeterli olduğunu düşünüyorum.	Su ve sabun	15-30 saniye	El hijyeni için gerekli malzemelerin eksikliği, Antiseptik solüsyonlar ve sabunların elleri tahriş etmesi	Katılıyorum	Katılıyorum	Kararsızım	Katılıyorum	Katılmıyorum	Katılıyorum	Katılıyorum	Katılmıyorum	Katılıyorum	Katılıyorum	Katılıyorum	Katılıyorum	Katılıyorum	Katılıyorum	Katılıyorum	Katılmıyorum	Katılmıyorum	Katılmıyorum	Katılmıyorum	Katılmıyorum	Katılmıyorum	Katılıyorum	Kesinlikle Katılıyorum	Katılmıyorum	Kesinlikle Katılmıyorum	Kesinlikle Katılıyorum	Katılmıyorum	Katılmıyorum	Her Zaman	Her Zaman	Her Zaman	Her Zaman	Her Zaman
2022-09-23 12:34:03	0	Kadın	21-30 yaş	Evli	Üniversite	Hemşire/Sağlık Memuru	Ameliyathane	5 yıl ve üzeri	6-10 yıl	Gündüz	Kurum İçi Egitim	Katıldım	El hijyeni ile ilgili bilgilerimin yeterli olduğunu düşünüyorum.	Su ve sabun	15 saniyeden az	El hijyeni için gerekli malzemelerin eksikliği, Antiseptik solüsyonlar ve sabunların elleri tahriş etmesi, Zaman kısıtlılığı	Katılıyorum	Katılıyorum	Katılmıyorum	Katılıyorum	Katılmıyorum	Katılıyorum	Katılıyorum	Katılmıyorum	Katılıyorum	Katılıyorum	Katılıyorum	Kararsızım	Katılıyorum	Katılıyorum	Katılıyorum	Katılmıyorum	Katılmıyorum	Katılıyorum	Kararsızım	Kararsızım	Katılıyorum	Katılıyorum	Katılıyorum	Katılmıyorum	Katılmıyorum	Katılıyorum	Kararsızım	Katılıyorum	Bazen	Her Zaman	Çoğu Zaman	Bazen	Her Zaman
2022-09-23 12:37:35	0	Kadın	40-49 yaş	Evli	Üniversite	Hemşire/Sağlık Memuru	Ameliyathane	5 yıl ve üzeri	16 yıl ve üzeri	Gündüz/Gece dönüşümlü	Kurum İçi Egitim	Katıldım	El hijyeni ile ilgili bilgilerimin yeterli olduğunu düşünüyorum.	Su ve sabun	15-30 saniye	El hijyeni için gerekli malzemelerin eksikliği, Antiseptik solüsyonlar ve sabunların elleri tahriş etmesi	Kesinlikle Katılıyorum	Kesinlikle Katılıyorum	Kararsızım	Katılıyorum	Katılmıyorum	Katılıyorum	Kesinlikle Katılıyorum	Katılmıyorum	Kesinlikle Katılıyorum	Katılıyorum	Katılıyorum	Katılıyorum	Kesinlikle Katılıyorum	Kesinlikle Katılıyorum	Katılıyorum	Kesinlikle Katılmıyorum	Kesinlikle Katılmıyorum	Katılmıyorum	Kesinlikle Katılmıyorum	Katılmıyorum	Katılıyorum	Katılıyorum	Katılıyorum	Kesinlikle Katılmıyorum	Kesinlikle Katılmıyorum	Kesinlikle Katılıyorum	Kararsızım	Katılıyorum	Sıklıkla	Her Zaman	Her Zaman	Bazen	Her Zaman
2022-09-23 13:01:50	0	Kadın	40-49 yaş	Bekâr	Üniversite	Hemşire/Sağlık Memuru	Ameliyathane	5 yıl ve üzeri	16 yıl ve üzeri	Gündüz/Gece dönüşümlü	Katılmadım	Katıldım	El hijyeni ile ilgili bilgilerimin yeterli olduğunu düşünüyorum.	Alkol bazlı el dezenfektanı	30 saniyeden fazla	İş yükünün fazla olması, El hijyeni için gerekli malzemelerin eksikliği, Antiseptik solüsyonlar ve sabunların elleri tahriş etmesi, Zaman kısıtlılığı	Kesinlikle Katılıyorum	Kararsızım	Kararsızım	Kararsızım	Kesinlikle Katılmıyorum	Kesinlikle Katılıyorum	Kesinlikle Katılıyorum	Kesinlikle Katılmıyorum	Kesinlikle Katılıyorum	Kararsızım	Kesinlikle Katılıyorum	Katılıyorum	Katılıyorum	Kesinlikle Katılıyorum	Kesinlikle Katılıyorum	Katılmıyorum	Katılmıyorum	Kararsızım	Katılmıyorum	Kararsızım	Katılıyorum	Kesinlikle Katılıyorum	Kesinlikle Katılıyorum	Kesinlikle Katılmıyorum	Kesinlikle Katılmıyorum	Kesinlikle Katılıyorum	Katılıyorum	Kesinlikle Katılıyorum	Sıklıkla	Her Zaman	Her Zaman	Bazen	Her Zaman
2022-09-23 13:03:32	0	Kadın	40-49 yaş	Evli	Üniversite	Hemşire/Sağlık Memuru	Ameliyathane	0-2 yıl	16 yıl ve üzeri	Gündüz/Gece dönüşümlü	Konferans	Katıldım	El hijyeni ile ilgili bilgilerimin yeterli olduğunu düşünüyorum.	Su ve sabun	30 saniyeden fazla	İş yükünün fazla olması, Zaman kısıtlılığı	Katılıyorum	Kesinlikle Katılıyorum	Katılıyorum	Katılıyorum	Kesinlikle Katılmıyorum	Katılıyorum	Katılıyorum	Katılmıyorum	Katılıyorum	Katılıyorum	Kesinlikle Katılıyorum	Kararsızım	Kesinlikle Katılıyorum	Kesinlikle Katılıyorum	Kesinlikle Katılıyorum	Kesinlikle Katılıyorum	Kesinlikle Katılıyorum	Kararsızım	Kesinlikle Katılmıyorum	Katılmıyorum	Katılıyorum	Kesinlikle Katılıyorum	Kesinlikle Katılıyorum	Kesinlikle Katılmıyorum	Kesinlikle Katılmıyorum	Kesinlikle Katılıyorum	Katılmıyorum	Kesinlikle Katılıyorum	Her Zaman	Her Zaman	Her Zaman	Her Zaman	Her Zaman
2022-09-23 13:29:21	0	Kadın	40-49 yaş	Evli	Doktora	Doktor	Ameliyathane	5 yıl ve üzeri	11-15 yıl	Gündüz	Katılmadım	Katıldım	El hijyeni ile ilgili bilgilerimi geliştirmem gerektiğini düşünüyorum.	Su ve sabun	15-30 saniye	Antiseptik solüsyonlar ve sabunların elleri tahriş etmesi, Zaman kısıtlılığı	Kararsızım	Katılıyorum	Katılıyorum	Katılıyorum	Kesinlikle Katılmıyorum	Katılıyorum	Kesinlikle Katılıyorum	Katılmıyorum	Kesinlikle Katılıyorum	Kesinlikle Katılmıyorum	Katılıyorum	Katılıyorum	Kesinlikle Katılıyorum	Kesinlikle Katılıyorum	Kesinlikle Katılıyorum	Katılıyorum	Katılıyorum	Kararsızım	Kesinlikle Katılmıyorum	Katılmıyorum	Kesinlikle Katılmıyorum	Kesinlikle Katılıyorum	Kesinlikle Katılıyorum	Kesinlikle Katılmıyorum	Kesinlikle Katılmıyorum	Kesinlikle Katılıyorum	Kesinlikle Katılmıyorum	Kesinlikle Katılıyorum	Her Zaman	Her Zaman	Her Zaman	Her Zaman	Her Zaman
2022-09-23 14:31:01	0	Kadın	50 ve üzeri yaş	Bekâr	Üniversite	Hemşire/Sağlık Memuru	Ameliyathane	5 yıl ve üzeri	16 yıl ve üzeri	Gündüz/Gece dönüşümlü	Kurs	Katıldım	El hijyeni ile ilgili bilgilerimin yeterli olduğunu düşünüyorum.	Alkol bazlı el dezenfektanı	15-30 saniye	İş yükünün fazla olması	Kesinlikle Katılıyorum	Katılıyorum	Kesinlikle Katılıyorum	Katılıyorum	Kesinlikle Katılıyorum	Katılıyorum	Kesinlikle Katılıyorum	Katılmıyorum	Katılıyorum	Kesinlikle Katılıyorum	Katılıyorum	Katılıyorum	Katılıyorum	Kesinlikle Katılıyorum	Katılıyorum	Katılıyorum	Kararsızım	Katılıyorum	Kesinlikle Katılmıyorum	Katılıyorum	Katılıyorum	Kesinlikle Katılıyorum	Kesinlikle Katılıyorum	Kesinlikle Katılmıyorum	Katılıyorum	Katılıyorum	Kararsızım	Katılıyorum	Her Zaman	Her Zaman	Her Zaman	Her Zaman	Çoğu Zaman
2022-09-23 15:22:36	0	Kadın	50 ve üzeri yaş	Evli	Lise	Hemşire/Sağlık Memuru	Ameliyathane	5 yıl ve üzeri	16 yıl ve üzeri	Gündüz	Konferans	Katıldım	El hijyeni ile ilgili bilgilerimin yeterli olduğunu düşünüyorum.	Su ve sabun	15-30 saniye	İş yükünün fazla olması, Zaman kısıtlılığı	Katılıyorum	Katılıyorum	Katılıyorum	Katılıyorum	Kararsızım	Katılıyorum	Katılıyorum	Kararsızım	Katılıyorum	Katılmıyorum	Katılıyorum	Katılıyorum	Katılıyorum	Katılıyorum	Katılıyorum	Katılıyorum	Katılmıyorum	Kararsızım	Katılıyorum	Katılmıyorum	Katılmıyorum	Katılıyorum	Katılıyorum	Katılmıyorum	Katılmıyorum	Katılıyorum	Kararsızım	Katılıyorum	Her Zaman	Her Zaman	Her Zaman	Her Zaman	Her Zaman
2022-09-23 16:04:42	0	Kadın	21-30 yaş	Evli	Yüksekokul	Hemşire/Sağlık Memuru	Ameliyathane	0-2 yıl	1-5 yıl	Gündüz/Gece dönüşümlü	Kurs	Katıldım	El hijyeni ile ilgili bilgilerimin yeterli olduğunu düşünüyorum.	Su ve sabun	15-30 saniye	İş yükünün fazla olması, El hijyeni için gerekli malzemelerin eksikliği, Antiseptik solüsyonlar ve sabunların elleri tahriş etmesi	Katılıyorum	Katılıyorum	Katılıyorum	Katılıyorum	Katılıyorum	Katılıyorum	Katılıyorum	Katılıyorum	Katılıyorum	Katılıyorum	Katılıyorum	Katılıyorum	Katılıyorum	Katılıyorum	Katılıyorum	Katılıyorum	Katılıyorum	Katılıyorum	Katılıyorum	Katılıyorum	Kesinlikle Katılıyorum	Katılıyorum	Katılıyorum	Katılıyorum	Katılıyorum	Katılıyorum	Katılıyorum	Katılıyorum	Her Zaman	Her Zaman	Her Zaman	Her Zaman	Her Zaman
2022-09-23 20:27:59	0	Kadın	21-30 yaş	Bekâr	Yüksekokul	Hemşire/Sağlık Memuru	Ameliyathane	0-2 yıl	1-5 yıl	Gündüz/Gece dönüşümlü	Konferans	Hiç Katılmadım	El hijyeni ile ilgili bilgilerimin yeterli olduğunu düşünüyorum.	Su ve sabun	15-30 saniye	Eldiven giymenin el hijyeni için yeterli olması	Kesinlikle Katılıyorum	Kesinlikle Katılıyorum	Kesinlikle Katılıyorum	Kesinlikle Katılıyorum	Kararsızım	Kesinlikle Katılıyorum	Kesinlikle Katılıyorum	Katılıyorum	Kesinlikle Katılıyorum	Katılıyorum	Kesinlikle Katılıyorum	Katılıyorum	Katılıyorum	Kesinlikle Katılıyorum	Kesinlikle Katılıyorum	Katılıyorum	Katılıyorum	Katılmıyorum	Katılmıyorum	Kesinlikle Katılmıyorum	Katılıyorum	Kesinlikle Katılıyorum	Kesinlikle Katılıyorum	Kesinlikle Katılmıyorum	Kesinlikle Katılmıyorum	Kesinlikle Katılıyorum	Katılıyorum	Kesinlikle Katılıyorum	Sıklıkla	Çoğu Zaman	Her Zaman	Her Zaman	Her Zaman
2022-09-26 10:30:30	0	Erkek	40-49 yaş	Evli	Yüksekokul	Hemşire/Sağlık Memuru	Ameliyathane	5 yıl ve üzeri	11-15 yıl	Gündüz/Gece dönüşümlü	Konferans	Katıldım	El hijyeni ile ilgili bilgilerimin yeterli olduğunu düşünüyorum.	Povidon-iyot çözeltileri	30 saniyeden fazla	İş yükünün fazla olması, El hijyeni için gerekli malzemelerin eksikliği, Antiseptik solüsyonlar ve sabunların elleri tahriş etmesi, Zaman kısıtlılığı, Eldiven giymenin el hijyeni için yeterli olması	Kesinlikle Katılıyorum	Kesinlikle Katılıyorum	Kesinlikle Katılıyorum	Kesinlikle Katılıyorum	Katılmıyorum	Katılıyorum	Katılıyorum	Katılmıyorum	Kesinlikle Katılıyorum	Katılmıyorum	Kesinlikle Katılıyorum	Kararsızım	Katılıyorum	Katılıyorum	Katılıyorum	Katılıyorum	Katılıyorum	Kararsızım	Katılmıyorum	Kesinlikle Katılmıyorum	Katılmıyorum	Katılıyorum	Katılıyorum	Kesinlikle Katılmıyorum	Kesinlikle Katılmıyorum	Kesinlikle Katılıyorum	Katılıyorum	Katılmıyorum	Her Zaman	Her Zaman	Her Zaman	Her Zaman	Her Zaman
2022-09-26 14:19:25	0	Kadın	40-49 yaş	Evli	Üniversite	Hemşire/Sağlık Memuru	Ameliyathane	5 yıl ve üzeri	16 yıl ve üzeri	Gündüz/Gece dönüşümlü	Konferans	Katıldım	El hijyeni ile ilgili bilgilerimin yeterli olduğunu düşünüyorum.	Povidon-iyot çözeltileri	15-30 saniye	Antiseptik solüsyonlar ve sabunların elleri tahriş etmesi	Kesinlikle Katılıyorum	Kesinlikle Katılıyorum	Kesinlikle Katılıyorum	Katılıyorum	Katılmıyorum	Katılıyorum	Katılıyorum	Katılmıyorum	Katılıyorum	Katılıyorum	Katılıyorum	Kararsızım	Katılıyorum	Kesinlikle Katılıyorum	Katılıyorum	Katılıyorum	Katılıyorum	Kararsızım	Katılmıyorum	Katılmıyorum	Katılmıyorum	Katılmıyorum	Katılıyorum	Katılmıyorum	Katılmıyorum	Katılıyorum	Kararsızım	Kararsızım	Her Zaman	Her Zaman	Her Zaman	Her Zaman	Her Zaman
2022-09-26 15:32:01	0	Erkek	21-30 yaş	Bekâr	Yüksekokul	Hemşire/Sağlık Memuru	Ameliyathane	3-4 yıl	1-5 yıl	Gündüz/Gece dönüşümlü	Konferans	Hiç Katılmadım	El hijyeni ile ilgili bilgilerimin yeterli olduğunu düşünüyorum.	Alkol bazlı el dezenfektanı	15-30 saniye	El hijyeni için gerekli malzemelerin eksikliği, Antiseptik solüsyonlar ve sabunların elleri tahriş etmesi, Rol model eksikliği	Katılıyorum	Katılıyorum	Kesinlikle Katılıyorum	Kararsızım	Katılıyorum	Katılıyorum	Kararsızım	Kesinlikle Katılıyorum	Katılıyorum	Katılmıyorum	Kesinlikle Katılıyorum	Kararsızım	Katılıyorum	Katılıyorum	Katılıyorum	Katılmıyorum	Katılmıyorum	Kesinlikle Katılıyorum	Kararsızım	Kesinlikle Katılmıyorum	Katılıyorum	Kesinlikle Katılıyorum	Katılıyorum	Katılmıyorum	Kesinlikle Katılmıyorum	Katılıyorum	Katılıyorum	Kesinlikle Katılıyorum	Her Zaman	Her Zaman	Her Zaman	Her Zaman	Her Zaman
2022-09-26 18:55:26	0	Erkek	40-49 yaş	Evli	Yüksek Lisans	Hemşire/Sağlık Memuru	Ameliyathane	5 yıl ve üzeri	16 yıl ve üzeri	Gündüz/Gece dönüşümlü	Katılmadım	Katıldım	El hijyeni ile ilgili bilgilerimin yeterli olduğunu düşünüyorum.	Alkol bazlı el dezenfektanı	15-30 saniye	Antiseptik solüsyonlar ve sabunların elleri tahriş etmesi, Eldiven giymenin el hijyeni için yeterli olması	Kesinlikle Katılıyorum	Katılıyorum	Katılıyorum	Kesinlikle Katılıyorum	Katılmıyorum	Katılıyorum	Katılıyorum	Katılmıyorum	Kesinlikle Katılıyorum	Katılıyorum	Katılıyorum	Katılıyorum	Katılıyorum	Katılıyorum	Katılıyorum	Katılıyorum	Katılıyorum	Katılıyorum	Katılmıyorum	Katılmıyorum	Kesinlikle Katılmıyorum	Katılıyorum	Katılıyorum	Katılmıyorum	Kesinlikle Katılmıyorum	Katılıyorum	Katılıyorum	Katılmıyorum	Sıklıkla	Çoğu Zaman	Bazen	Çoğu Zaman	Çoğu Zaman
2022-09-26 19:05:46	0	Erkek	31-39 yaş	Bekâr	Üniversite	Hemşire/Sağlık Memuru	Acil Servis	5 yıl ve üzeri	11-15 yıl	Gündüz/Gece dönüşümlü	Kurs	Katıldım	El hijyeni ile ilgili bilgilerimi geliştirmem gerektiğini düşünüyorum.	Su ve sabun	30 saniyeden fazla	Antiseptik solüsyonlar ve sabunların elleri tahriş etmesi	Kararsızım	Katılıyorum	Kararsızım	Katılmıyorum	Katılıyorum	Katılmıyorum	Katılıyorum	Kararsızım	Kararsızım	Kararsızım	Katılıyorum	Kararsızım	Katılıyorum	Katılıyorum	Kararsızım	Kararsızım	Katılmıyorum	Katılıyorum	Kararsızım	Katılıyorum	Katılıyorum	Katılıyorum	Kesinlikle Katılıyorum	Katılıyorum	Kararsızım	Kararsızım	Katılmıyorum	Katılıyorum	Bazen	Her Zaman	Sıklıkla	Sıklıkla	Sıklıkla
2022-09-26 19:49:45	0	Erkek	31-39 yaş	Evli	Doktora	Doktor	Cerrahi Klinikleri	3-4 yıl	1-5 yıl	Gündüz/Gece dönüşümlü	Sempozyum	Katıldım	El hijyeni ile ilgili bilgilerimin yeterli olduğunu düşünüyorum.	Alkol bazlı el dezenfektanı	30 saniyeden fazla	İş yükünün fazla olması, El hijyeni için gerekli malzemelerin eksikliği, El hijyeni için bilgilendirici tabela, afiş, rehberlerin eksikliği	Katılıyorum	Katılıyorum	Kesinlikle Katılmıyorum	Kesinlikle Katılmıyorum	Katılıyorum	Katılmıyorum	Katılmıyorum	Katılıyorum	Katılıyorum	Katılıyorum	Katılıyorum	Katılıyorum	Katılıyorum	Katılıyorum	Katılıyorum	Kararsızım	Kararsızım	Kararsızım	Kararsızım	Katılmıyorum	Kararsızım	Katılmıyorum	Kesinlikle Katılmıyorum	Kesinlikle Katılmıyorum	Katılıyorum	Kesinlikle Katılmıyorum	Katılmıyorum	Katılmıyorum	Sıklıkla	Bazen	Sıklıkla	Sıklıkla	Sıklıkla
2022-09-26 22:25:28	0	Erkek	31-39 yaş	Evli	Üniversite	Hemşire/Sağlık Memuru	Ameliyathane	3-4 yıl	11-15 yıl	Gündüz/Gece dönüşümlü	Kurum İçi Egitim	Katıldım	El hijyeni ile ilgili bilgilerimin yeterli olduğunu düşünüyorum.	Su ve sabun	15-30 saniye	Antiseptik solüsyonlar ve sabunların elleri tahriş etmesi	Kesinlikle Katılıyorum	Katılıyorum	Katılmıyorum	Kesinlikle Katılıyorum	Katılmıyorum	Katılıyorum	Kesinlikle Katılıyorum	Katılmıyorum	Katılıyorum	Kesinlikle Katılıyorum	Katılıyorum	Katılıyorum	Kesinlikle Katılıyorum	Katılıyorum	Kesinlikle Katılıyorum	Katılmıyorum	Katılmıyorum	Katılıyorum	Katılmıyorum	Katılmıyorum	Kesinlikle Katılmıyorum	Katılıyorum	Kesinlikle Katılıyorum	Katılmıyorum	Kesinlikle Katılmıyorum	Kesinlikle Katılıyorum	Katılıyorum	Kesinlikle Katılıyorum	Çoğu Zaman	Çoğu Zaman	Çoğu Zaman	Çoğu Zaman	Her Zaman
2022-09-26 22:30:38	0	Erkek	21-30 yaş	Bekâr	Lise	Temizlik Personeli	Ameliyathane	0-2 yıl	0-11 ay	Gündüz	Konferans	Katıldım	El hijyeni ile ilgili bilgilerimin yeterli olduğunu düşünüyorum.	Su ve sabun	15-30 saniye	İş yükünün fazla olması, Antiseptik solüsyonlar ve sabunların elleri tahriş etmesi, Zaman kısıtlılığı	Kesinlikle Katılıyorum	Kesinlikle Katılıyorum	Katılıyorum	Katılıyorum	Katılıyorum	Katılıyorum	Katılıyorum	Katılıyorum	Katılıyorum	Katılıyorum	Katılıyorum	Katılıyorum	Katılıyorum	Katılıyorum	Katılıyorum	Katılıyorum	Katılıyorum	Katılıyorum	Katılıyorum	Katılıyorum	Katılıyorum	Katılıyorum	Katılıyorum	Katılıyorum	Katılıyorum	Katılıyorum	Katılıyorum	Katılıyorum	Sıklıkla	Çoğu Zaman	Sıklıkla	Sıklıkla	Sıklıkla
2022-09-27 00:06:43	0	Erkek	21-30 yaş	Evli	Yüksek Lisans	Doktor	Cerrahi Klinikleri	0-2 yıl	1-5 yıl	Gündüz	Katılmadım	Hiç Katılmadım	El hijyeni ile ilgili bilgilerimin yeterli olduğunu düşünüyorum.	Povidon-iyot çözeltileri	30 saniyeden fazla	İş yükünün fazla olması, El hijyeni için gerekli malzemelerin eksikliği, Antiseptik solüsyonlar ve sabunların elleri tahriş etmesi	Katılıyorum	Katılıyorum	Katılıyorum	Katılıyorum	Katılıyorum	Katılıyorum	Katılıyorum	Katılıyorum	Katılıyorum	Katılıyorum	Katılıyorum	Katılıyorum	Katılıyorum	Katılıyorum	Katılıyorum	Katılıyorum	Katılıyorum	Katılıyorum	Katılıyorum	Katılıyorum	Katılıyorum	Katılıyorum	Kesinlikle Katılıyorum	Kesinlikle Katılmıyorum	Kesinlikle Katılmıyorum	Kesinlikle Katılıyorum	Katılıyorum	Kesinlikle Katılıyorum	Çoğu Zaman	Çoğu Zaman	Çoğu Zaman	Her Zaman	Her Zaman
2022-09-27 00:35:23	0	Erkek	31-39 yaş	Evli	Yüksek Lisans	Doktor	Cerrahi Klinikleri	3-4 yıl	11-15 yıl	Gündüz/Gece dönüşümlü	Konferans	Hiç Katılmadım	El hijyeni ile ilgili bilgilerimin yeterli olduğunu düşünüyorum.	Su ve sabun	15-30 saniye	El hijyeni için gerekli malzemelerin eksikliği, El hijyeni için bilgilendirici tabela, afiş, rehberlerin eksikliği	Kesinlikle Katılıyorum	Katılıyorum	Kararsızım	Katılıyorum	Kesinlikle Katılmıyorum	Kesinlikle Katılıyorum	Kesinlikle Katılıyorum	Katılmıyorum	Kesinlikle Katılıyorum	Katılıyorum	Kesinlikle Katılıyorum	Katılıyorum	Katılıyorum	Kesinlikle Katılıyorum	Kesinlikle Katılıyorum	Kesinlikle Katılmıyorum	Kesinlikle Katılmıyorum	Katılıyorum	Kesinlikle Katılmıyorum	Kararsızım	Katılıyorum	Kesinlikle Katılıyorum	Kesinlikle Katılıyorum	Katılmıyorum	Kesinlikle Katılmıyorum	Kesinlikle Katılıyorum	Katılıyorum	Kesinlikle Katılıyorum	Çoğu Zaman	Her Zaman	Çoğu Zaman	Her Zaman	Her Zaman
2022-09-27 08:19:31	0	Kadın	40-49 yaş	Evli	Üniversite	Hemşire/Sağlık Memuru	Ameliyathane	5 yıl ve üzeri	16 yıl ve üzeri	Gündüz	Konferans	Katıldım	El hijyeni ile ilgili bilgilerimin yeterli olduğunu düşünüyorum.	Su ve sabun	30 saniyeden fazla	İş yükünün fazla olması, El hijyeni için gerekli malzemelerin eksikliği, Antiseptik solüsyonlar ve sabunların elleri tahriş etmesi, Zaman kısıtlılığı	Kesinlikle Katılmıyorum	Kesinlikle Katılmıyorum	Kesinlikle Katılmıyorum	Kesinlikle Katılmıyorum	Katılmıyorum	Kesinlikle Katılıyorum	Kesinlikle Katılıyorum	Katılmıyorum	Kesinlikle Katılıyorum	Katılmıyorum	Katılıyorum	Katılmıyorum	Katılıyorum	Katılıyorum	Kesinlikle Katılıyorum	Katılmıyorum	Katılmıyorum	Katılıyorum	Katılmıyorum	Katılmıyorum	Katılıyorum	Kesinlikle Katılmıyorum	Katılıyorum	Kesinlikle Katılmıyorum	Kesinlikle Katılmıyorum	Kesinlikle Katılıyorum	Katılıyorum	Katılıyorum	Her Zaman	Her Zaman	Her Zaman	Her Zaman	Her Zaman
2022-09-27 09:59:27	0	Erkek	40-49 yaş	Bekâr	Yüksek Lisans	Hemşire/Sağlık Memuru	Ameliyathane	5 yıl ve üzeri	16 yıl ve üzeri	Gündüz/Gece dönüşümlü	Konferans	Katıldım	El hijyeni ile ilgili bilgilerimin yeterli olduğunu düşünüyorum.	Su ve sabun	15-30 saniye	İş yükünün fazla olması, El hijyeni için gerekli malzemelerin eksikliği, Antiseptik solüsyonlar ve sabunların elleri tahriş etmesi	Katılıyorum	Kesinlikle Katılıyorum	Katılıyorum	Katılmıyorum	Katılmıyorum	Katılmıyorum	Kesinlikle Katılıyorum	Katılıyorum	Katılıyorum	Katılmıyorum	Kesinlikle Katılıyorum	Katılıyorum	Katılıyorum	Kesinlikle Katılıyorum	Katılıyorum	Katılmıyorum	Katılmıyorum	Katılmıyorum	Katılmıyorum	Katılıyorum	Katılıyorum	Katılıyorum	Kesinlikle Katılıyorum	Katılıyorum	Kararsızım	Katılıyorum	Katılıyorum	Katılıyorum	Hiçbir Zaman	Çoğu Zaman	Sıklıkla	Sıklıkla	Sıklıkla
2022-09-27 14:02:59	0	Kadın	50 ve üzeri yaş	Bekâr	Lise	Hemşire/Sağlık Memuru	Ameliyathane	5 yıl ve üzeri	16 yıl ve üzeri	Gündüz/Gece dönüşümlü	Kurum İçi Egitim	Katıldım	El hijyeni ile ilgili bilgilerimin yeterli olduğunu düşünüyorum.	Su ve sabun	15-30 saniye	İş yükünün fazla olması, Antiseptik solüsyonlar ve sabunların elleri tahriş etmesi	Kesinlikle Katılıyorum	Katılmıyorum	Katılıyorum	Kararsızım	Katılmıyorum	Katılıyorum	Katılıyorum	Kararsızım	Kesinlikle Katılıyorum	Katılıyorum	Katılıyorum	Katılıyorum	Katılıyorum	Katılıyorum	Katılıyorum	Katılıyorum	Katılıyorum	Katılmıyorum	Kararsızım	Katılmıyorum	Katılmıyorum	Katılıyorum	Kesinlikle Katılıyorum	Kesinlikle Katılmıyorum	Kesinlikle Katılmıyorum	Kesinlikle Katılıyorum	Kararsızım	Katılıyorum	Çoğu Zaman	Her Zaman	Her Zaman	Çoğu Zaman	Çoğu Zaman
2022-09-27 18:17:21	0	Kadın	50 ve üzeri yaş	Evli	Yüksekokul	Hemşire/Sağlık Memuru	Ameliyathane	5 yıl ve üzeri	16 yıl ve üzeri	Gündüz/Gece dönüşümlü	Konferans	Hiç Katılmadım	El hijyeni ile ilgili bilgilerimin yeterli olduğunu düşünüyorum.	Su ve sabun	15-30 saniye	El hijyeni için gerekli malzemelerin eksikliği, Antiseptik solüsyonlar ve sabunların elleri tahriş etmesi, Eldiven giymenin el hijyeni için yeterli olması	Katılıyorum	Katılıyorum	Katılmıyorum	Katılıyorum	Kararsızım	Kesinlikle Katılıyorum	Kesinlikle Katılıyorum	Kesinlikle Katılıyorum	Kesinlikle Katılıyorum	Katılmıyorum	Kesinlikle Katılıyorum	Kesinlikle Katılmıyorum	Kararsızım	Kesinlikle Katılıyorum	Kesinlikle Katılıyorum	Katılıyorum	Katılıyorum	Katılmıyorum	Kesinlikle Katılmıyorum	Katılıyorum	Kesinlikle Katılıyorum	Kesinlikle Katılıyorum	Kesinlikle Katılıyorum	Kararsızım	Katılmıyorum	Kesinlikle Katılıyorum	Katılıyorum	Kesinlikle Katılıyorum	Bazen	Sıklıkla	Sıklıkla	Bazen	Çoğu Zaman
2022-10-11 10:39:00	0	Erkek	31-39 yaş	Bekâr	Yüksek Lisans	Doktor	Cerrahi Klinikleri	3-4 yıl	16 yıl ve üzeri	Gündüz	Katılmadım	Katıldım	El hijyeni ile ilgili bilgilerimin yeterli olduğunu düşünüyorum.	Klorkeksidin	15 saniyeden az	İş yükünün fazla olması, Antiseptik solüsyonlar ve sabunların elleri tahriş etmesi, Zaman kısıtlılığı	Kesinlikle Katılıyorum	Katılıyorum	Kararsızım	Katılıyorum	Katılmıyorum	Kesinlikle Katılıyorum	Kesinlikle Katılıyorum	Katılıyorum	Katılıyorum	Katılıyorum	Katılıyorum	Kararsızım	Katılıyorum	Katılıyorum	Kararsızım	Katılıyorum	Katılıyorum	Katılıyorum	Katılmıyorum	Kesinlikle Katılıyorum	Katılıyorum	Katılıyorum	Kesinlikle Katılıyorum	Katılmıyorum	Kesinlikle Katılmıyorum	Kesinlikle Katılıyorum	Katılmıyorum	Kararsızım	Çoğu Zaman	Çoğu Zaman	Çoğu Zaman	Sıklıkla	Çoğu Zaman
2022-10-11 10:39:01	0	Erkek	40-49 yaş	Evli	Yüksek Lisans	Doktor	Cerrahi Klinikleri	3-4 yıl	16 yıl ve üzeri	Gündüz/Gece dönüşümlü	Kurum İçi Egitim	Katıldım	El hijyeni ile ilgili bilgilerimin yeterli olduğunu düşünüyorum.	Alkol bazlı el dezenfektanı	15-30 saniye	İş yükünün fazla olması, Antiseptik solüsyonlar ve sabunların elleri tahriş etmesi, Zaman kısıtlılığı	Kesinlikle Katılmıyorum	Katılıyorum	Kararsızım	Katılıyorum	Kararsızım	Katılıyorum	Kesinlikle Katılıyorum	Katılıyorum	Kesinlikle Katılıyorum	Katılıyorum	Katılıyorum	Kararsızım	Katılıyorum	Kesinlikle Katılıyorum	Katılıyorum	Katılıyorum	Katılıyorum	Katılıyorum	Katılmıyorum	Kesinlikle Katılıyorum	Kesinlikle Katılıyorum	Kesinlikle Katılıyorum	Kesinlikle Katılıyorum	Kesinlikle Katılmıyorum	Kesinlikle Katılmıyorum	Kesinlikle Katılıyorum	Kararsızım	Katılmıyorum	Sıklıkla	Sıklıkla	Bazen	Sıklıkla	Sıklıkla
2022-10-11 10:47:31	0	Erkek	40-49 yaş	Evli	Doktora	Doktor	Dahiliye Klinikleri	0-2 yıl	16 yıl ve üzeri	Gündüz	Kurum İçi Egitim	Katıldım	El hijyeni ile ilgili bilgilerimin yeterli olduğunu düşünüyorum.	Su ve sabun	15-30 saniye	El hijyeni için gerekli malzemelerin eksikliği	Kesinlikle Katılıyorum	Katılıyorum	Katılmıyorum	Katılıyorum	Katılmıyorum	Kesinlikle Katılıyorum	Kesinlikle Katılıyorum	Katılmıyorum	Kesinlikle Katılıyorum	Katılıyorum	Kesinlikle Katılıyorum	Kararsızım	Kesinlikle Katılıyorum	Katılıyorum	Katılıyorum	Katılıyorum	Katılıyorum	Katılıyorum	Kesinlikle Katılmıyorum	Katılmıyorum	Katılmıyorum	Katılıyorum	Kesinlikle Katılıyorum	Kesinlikle Katılmıyorum	Kesinlikle Katılmıyorum	Kesinlikle Katılıyorum	Katılıyorum	Kesinlikle Katılıyorum	Bazen	Bazen	Bazen	Bazen	Sıklıkla
2022-10-11 11:19:35	0	Erkek	31-39 yaş	Evli	Yüksek Lisans	Doktor	Acil Servis	0-2 yıl	6-10 yıl	Gündüz/Gece dönüşümlü	Katılmadım	Hiç Katılmadım	El hijyeni ile ilgili bilgilerimin yeterli olduğunu düşünüyorum.	Su ve sabun	15-30 saniye	İş yükünün fazla olması, El hijyeni için gerekli malzemelerin eksikliği, Antiseptik solüsyonlar ve sabunların elleri tahriş etmesi	Kesinlikle Katılmıyorum	Kararsızım	Katılıyorum	Kesinlikle Katılıyorum	Kararsızım	Kesinlikle Katılıyorum	Katılıyorum	Katılmıyorum	Kesinlikle Katılıyorum	Katılıyorum	Kesinlikle Katılıyorum	Katılıyorum	Kesinlikle Katılıyorum	Katılıyorum	Kesinlikle Katılıyorum	Kararsızım	Katılmıyorum	Kararsızım	Kesinlikle Katılmıyorum	Kesinlikle Katılmıyorum	Katılmıyorum	Katılıyorum	Kesinlikle Katılıyorum	Kesinlikle Katılmıyorum	Kesinlikle Katılmıyorum	Kesinlikle Katılıyorum	Katılıyorum	Katılmıyorum	Her Zaman	Sıklıkla	Çoğu Zaman	Çoğu Zaman	Çoğu Zaman
2022-10-11 11:28:57	0	Erkek	21-30 yaş	Evli	Üniversite	Hemşire/Sağlık Memuru	Cerrahi Klinikleri	0-2 yıl	1-5 yıl	Gündüz	Konferans	Katıldım	El hijyeni ile ilgili bilgilerimin yeterli olduğunu düşünüyorum.	Su ve sabun	30 saniyeden fazla	İş yükünün fazla olması, Antiseptik solüsyonlar ve sabunların elleri tahriş etmesi	Kesinlikle Katılıyorum	Katılıyorum	Kesinlikle Katılıyorum	Katılıyorum	Katılmıyorum	Katılıyorum	Kesinlikle Katılıyorum	Katılmıyorum	Kesinlikle Katılıyorum	Katılıyorum	Kesinlikle Katılıyorum	Katılıyorum	Katılmıyorum	Kesinlikle Katılıyorum	Katılıyorum	Katılıyorum	Katılıyorum	Kesinlikle Katılmıyorum	Kesinlikle Katılıyorum	Katılmıyorum	Katılmıyorum	Kesinlikle Katılıyorum	Kesinlikle Katılıyorum	Katılmıyorum	Katılmıyorum	Kesinlikle Katılıyorum	Katılıyorum	Katılıyorum	Her Zaman	Her Zaman	Çoğu Zaman	Her Zaman	Her Zaman
2022-10-11 12:06:44	0	Erkek	50 ve üzeri yaş	Evli	Doktora	Doktor	Cerrahi Klinikleri	0-2 yıl	16 yıl ve üzeri	Gündüz	Konferans	Katıldım	El hijyeni ile ilgili bilgilerimi geliştirmem gerektiğini düşünüyorum.	Su ve sabun	15 saniyeden az	El hijyeni için bilgilendirici tabela, afiş, rehberlerin eksikliği, Antiseptik solüsyonlar ve sabunların elleri tahriş etmesi, Rol model eksikliği	Kesinlikle Katılıyorum	Katılıyorum	Katılmıyorum	Katılıyorum	Katılıyorum	Katılıyorum	Katılıyorum	Katılıyorum	Kesinlikle Katılıyorum	Katılıyorum	Kesinlikle Katılıyorum	Katılmıyorum	Katılıyorum	Katılıyorum	Kararsızım	Katılıyorum	Katılıyorum	Katılıyorum	Kararsızım	Katılmıyorum	Katılmıyorum	Kesinlikle Katılıyorum	Kesinlikle Katılıyorum	Katılmıyorum	Katılmıyorum	Katılıyorum	Katılıyorum	Kesinlikle Katılıyorum	Bazen	Sıklıkla	Bazen	Çoğu Zaman	Her Zaman
2022-10-11 12:07:02	0	Kadın	21-30 yaş	Bekâr	Lise	Hemşire/Sağlık Memuru	Ameliyathane	0-2 yıl	1-5 yıl	Gündüz	Konferans	Katıldım	El hijyeni ile ilgili bilgilerimin yeterli olduğunu düşünüyorum.	Povidon-iyot çözeltileri	30 saniyeden fazla	İş yükünün fazla olması, Zaman kısıtlılığı	Kesinlikle Katılıyorum	Kesinlikle Katılıyorum	Kesinlikle Katılıyorum	Kesinlikle Katılıyorum	Kesinlikle Katılıyorum	Kesinlikle Katılıyorum	Kesinlikle Katılıyorum	Kesinlikle Katılıyorum	Kesinlikle Katılıyorum	Kesinlikle Katılıyorum	Kesinlikle Katılıyorum	Kesinlikle Katılıyorum	Kesinlikle Katılıyorum	Kesinlikle Katılıyorum	Kesinlikle Katılıyorum	Kesinlikle Katılıyorum	Kesinlikle Katılıyorum	Kesinlikle Katılıyorum	Kesinlikle Katılıyorum	Katılıyorum	Kesinlikle Katılıyorum	Kesinlikle Katılıyorum	Kesinlikle Katılıyorum	Kesinlikle Katılıyorum	Kesinlikle Katılıyorum	Kesinlikle Katılıyorum	Kesinlikle Katılıyorum	Kesinlikle Katılıyorum	Her Zaman	Her Zaman	Her Zaman	Her Zaman	Her Zaman
2022-10-11 12:07:54	0	Kadın	21-30 yaş	Bekâr	Lise	Hemşire/Sağlık Memuru	Ameliyathane	3-4 yıl	6-10 yıl	Gündüz	Konferans	Katıldım	El hijyeni ile ilgili bilgilerimin yeterli olduğunu düşünüyorum.	Povidon-iyot çözeltileri	30 saniyeden fazla	İş yükünün fazla olması, Antiseptik solüsyonlar ve sabunların elleri tahriş etmesi	Katılıyorum	Katılıyorum	Katılıyorum	Katılıyorum	Katılmıyorum	Katılıyorum	Kesinlikle Katılıyorum	Katılmıyorum	Katılıyorum	Katılıyorum	Katılıyorum	Kararsızım	Katılıyorum	Katılıyorum	Katılıyorum	Katılıyorum	Katılıyorum	Katılmıyorum	Kesinlikle Katılmıyorum	Kesinlikle Katılmıyorum	Katılmıyorum	Katılıyorum	Katılıyorum	Kesinlikle Katılmıyorum	Kesinlikle Katılmıyorum	Katılıyorum	Katılıyorum	Katılıyorum	Her Zaman	Her Zaman	Her Zaman	Her Zaman	Her Zaman
2022-10-11 12:09:33	0	Erkek	31-39 yaş	Evli	Lise	Hemşire/Sağlık Memuru	Ameliyathane	3-4 yıl	11-15 yıl	Gündüz	Kurum İçi Egitim	Katıldım	El hijyeni ile ilgili bilgilerimin yeterli olduğunu düşünüyorum.	Alkol bazlı el dezenfektanı	15-30 saniye	İş yükünün fazla olması, Zaman kısıtlılığı	Katılıyorum	Katılıyorum	Katılıyorum	Katılıyorum	Katılmıyorum	Kararsızım	Kesinlikle Katılıyorum	Kesinlikle Katılıyorum	Kesinlikle Katılıyorum	Kesinlikle Katılıyorum	Kesinlikle Katılıyorum	Kesinlikle Katılıyorum	Kesinlikle Katılıyorum	Kesinlikle Katılıyorum	Kesinlikle Katılıyorum	Kesinlikle Katılıyorum	Kesinlikle Katılıyorum	Kesinlikle Katılıyorum	Kesinlikle Katılıyorum	Kesinlikle Katılıyorum	Kesinlikle Katılıyorum	Kesinlikle Katılıyorum	Kesinlikle Katılıyorum	Kesinlikle Katılıyorum	Kesinlikle Katılıyorum	Kesinlikle Katılıyorum	Kesinlikle Katılıyorum	Kesinlikle Katılıyorum	Her Zaman	Her Zaman	Her Zaman	Her Zaman	Her Zaman
2022-10-11 12:10:01	0	Erkek	21-30 yaş	Bekâr	Üniversite	Hemşire/Sağlık Memuru	Ameliyathane	0-2 yıl	1-5 yıl	Gündüz	Katılmadım	Hiç Katılmadım	El hijyeni ile ilgili bilgilerimin yeterli olduğunu düşünüyorum.	Povidon-iyot çözeltileri	15-30 saniye	İş yükünün fazla olması, Zaman kısıtlılığı	Kesinlikle Katılıyorum	Kesinlikle Katılıyorum	Kesinlikle Katılıyorum	Kesinlikle Katılıyorum	Kesinlikle Katılıyorum	Kesinlikle Katılıyorum	Kesinlikle Katılıyorum	Kesinlikle Katılıyorum	Kesinlikle Katılıyorum	Kesinlikle Katılıyorum	Kesinlikle Katılıyorum	Kesinlikle Katılıyorum	Kesinlikle Katılıyorum	Kesinlikle Katılıyorum	Kesinlikle Katılıyorum	Kesinlikle Katılıyorum	Kesinlikle Katılıyorum	Kesinlikle Katılıyorum	Katılıyorum	Kararsızım	Katılmıyorum	Kesinlikle Katılıyorum	Kesinlikle Katılıyorum	Katılıyorum	Kesinlikle Katılmıyorum	Kesinlikle Katılıyorum	Kararsızım	Kesinlikle Katılıyorum	Her Zaman	Her Zaman	Her Zaman	Her Zaman	Her Zaman
2022-10-11 12:10:18	0	Kadın	21-30 yaş	Bekâr	Yüksekokul	Hemşire/Sağlık Memuru	Ameliyathane	0-2 yıl	0-11 ay	Gündüz	Katılmadım	Hiç Katılmadım	El hijyeni ile ilgili bilgilerimin yeterli olduğunu düşünüyorum.	Su ve sabun	30 saniyeden fazla	Antiseptik solüsyonlar ve sabunların elleri tahriş etmesi	Katılıyorum	Katılıyorum	Katılıyorum	Katılıyorum	Katılıyorum	Katılıyorum	Katılıyorum	Katılıyorum	Katılıyorum	Katılıyorum	Katılıyorum	Katılıyorum	Katılıyorum	Katılıyorum	Katılıyorum	Katılıyorum	Katılıyorum	Katılıyorum	Katılıyorum	Katılıyorum	Katılıyorum	Katılıyorum	Katılıyorum	Katılıyorum	Katılmıyorum	Katılıyorum	Katılıyorum	Katılıyorum	Her Zaman	Her Zaman	Çoğu Zaman	Çoğu Zaman	Çoğu Zaman
2022-10-11 12:13:21	0	Erkek	21-30 yaş	Evli	Yüksekokul	Hemşire/Sağlık Memuru	Ameliyathane	3-4 yıl	6-10 yıl	Gündüz/Gece dönüşümlü	Kurum İçi Egitim	Katıldım	El hijyeni ile ilgili bilgilerimi geliştirmem gerektiğini düşünüyorum.	Su ve sabun	15-30 saniye	İş yükünün fazla olması, El hijyeni için bilgilendirici tabela, afiş, rehberlerin eksikliği	Kesinlikle Katılıyorum	Kararsızım	Katılıyorum	Katılıyorum	Katılmıyorum	Katılıyorum	Kesinlikle Katılıyorum	Kararsızım	Kesinlikle Katılıyorum	Katılmıyorum	Katılıyorum	Katılmıyorum	Katılıyorum	Kesinlikle Katılıyorum	Kararsızım	Katılıyorum	Katılıyorum	Kesinlikle Katılıyorum	Katılmıyorum	Katılıyorum	Kesinlikle Katılmıyorum	Katılmıyorum	Kesinlikle Katılıyorum	Kesinlikle Katılmıyorum	Kesinlikle Katılmıyorum	Kesinlikle Katılıyorum	Katılıyorum	Katılıyorum	Çoğu Zaman	Her Zaman	Çoğu Zaman	Her Zaman	Çoğu Zaman
2022-10-11 12:16:51	0	Kadın	31-39 yaş	Evli	Yüksekokul	Hemşire/Sağlık Memuru	Ameliyathane	5 yıl ve üzeri	16 yıl ve üzeri	Gündüz/Gece dönüşümlü	Konferans	Katıldım	El hijyeni ile ilgili bilgilerimin yeterli olduğunu düşünüyorum.	Alkol bazlı el dezenfektanı	30 saniyeden fazla	Antiseptik solüsyonlar ve sabunların elleri tahriş etmesi	Kesinlikle Katılıyorum	Katılıyorum	Kesinlikle Katılıyorum	Kesinlikle Katılıyorum	Kesinlikle Katılmıyorum	Kesinlikle Katılıyorum	Kesinlikle Katılıyorum	Kesinlikle Katılmıyorum	Kesinlikle Katılıyorum	Kesinlikle Katılıyorum	Kesinlikle Katılıyorum	Kesinlikle Katılıyorum	Kesinlikle Katılıyorum	Kesinlikle Katılıyorum	Kesinlikle Katılıyorum	Kesinlikle Katılıyorum	Kesinlikle Katılıyorum	Kesinlikle Katılmıyorum	Kesinlikle Katılmıyorum	Kesinlikle Katılmıyorum	Kesinlikle Katılmıyorum	Kesinlikle Katılıyorum	Kesinlikle Katılıyorum	Kesinlikle Katılmıyorum	Kesinlikle Katılmıyorum	Kesinlikle Katılıyorum	Kesinlikle Katılmıyorum	Kesinlikle Katılıyorum	Her Zaman	Her Zaman	Her Zaman	Her Zaman	Her Zaman
2022-10-11 12:23:46	0	Erkek	40-49 yaş	Evli	Yüksek Lisans	Doktor	Cerrahi Klinikleri	3-4 yıl	16 yıl ve üzeri	Gündüz/Gece dönüşümlü	Konferans	Katıldım	El hijyeni ile ilgili bilgilerimi geliştirmem gerektiğini düşünüyorum.	Su ve sabun	15-30 saniye	İş yükünün fazla olması, Antiseptik solüsyonlar ve sabunların elleri tahriş etmesi	Kesinlikle Katılıyorum	Kesinlikle Katılıyorum	Katılıyorum	Kesinlikle Katılıyorum	Kesinlikle Katılmıyorum	Kesinlikle Katılıyorum	Kesinlikle Katılıyorum	Katılmıyorum	Kesinlikle Katılıyorum	Kesinlikle Katılıyorum	Kesinlikle Katılıyorum	Katılıyorum	Kesinlikle Katılmıyorum	Katılıyorum	Katılıyorum	Katılıyorum	Katılıyorum	Kesinlikle Katılmıyorum	Kesinlikle Katılmıyorum	Kararsızım	Kesinlikle Katılmıyorum	Kesinlikle Katılıyorum	Kesinlikle Katılıyorum	Kesinlikle Katılmıyorum	Kesinlikle Katılmıyorum	Kesinlikle Katılıyorum	Katılıyorum	Katılıyorum	Çoğu Zaman	Çoğu Zaman	Çoğu Zaman	Her Zaman	Her Zaman
2022-10-11 12:25:40	0	Erkek	50 ve üzeri yaş	Evli	Doktora	Doktor	YBÜ	0-2 yıl	16 yıl ve üzeri	Gündüz/Gece dönüşümlü	Katılmadım	Hiç Katılmadım	El hijyeni ile ilgili bilgilerimi geliştirmem gerektiğini düşünüyorum.	Povidon-iyot çözeltileri	15 saniyeden az	İş yükünün fazla olması, Zaman kısıtlılığı, Eldiven giymenin el hijyeni için yeterli olması	Kesinlikle Katılıyorum	Kesinlikle Katılıyorum	Katılıyorum	Kesinlikle Katılıyorum	Kesinlikle Katılmıyorum	Kesinlikle Katılıyorum	Kesinlikle Katılıyorum	Kararsızım	Kesinlikle Katılıyorum	Katılıyorum	Kesinlikle Katılıyorum	Kesinlikle Katılmıyorum	Katılıyorum	Katılıyorum	Kararsızım	Kesinlikle Katılıyorum	Kesinlikle Katılıyorum	Katılıyorum	Kesinlikle Katılmıyorum	Kesinlikle Katılmıyorum	Kesinlikle Katılmıyorum	Katılıyorum	Kesinlikle Katılıyorum	Kesinlikle Katılmıyorum	Kesinlikle Katılmıyorum	Kesinlikle Katılıyorum	Katılmıyorum	Kesinlikle Katılmıyorum	Sıklıkla	Her Zaman	Çoğu Zaman	Çoğu Zaman	Her Zaman
2022-10-11 12:29:40	0	Erkek	40-49 yaş	Evli	Doktora	Doktor	Dahiliye Klinikleri	3-4 yıl	16 yıl ve üzeri	Gündüz	Konferans	Hiç Katılmadım	El hijyeni ile ilgili bilgilerimi geliştirmem gerektiğini düşünüyorum.	Su ve sabun	15-30 saniye	İş yükünün fazla olması, El hijyeni için gerekli malzemelerin eksikliği, El hijyeni için bilgilendirici tabela, afiş, rehberlerin eksikliği, Zaman kısıtlılığı, El hijyeni ile ilgili yeterli bilgi sahibi olmamam	Kesinlikle Katılıyorum	Kesinlikle Katılıyorum	Katılmıyorum	Katılıyorum	Kararsızım	Kararsızım	Katılıyorum	Kararsızım	Katılıyorum	Katılıyorum	Katılıyorum	Kararsızım	Katılıyorum	Katılıyorum	Kararsızım	Katılıyorum	Katılıyorum	Kararsızım	Katılmıyorum	Katılıyorum	Katılıyorum	Katılıyorum	Katılıyorum	Katılmıyorum	Katılmıyorum	Katılıyorum	Kararsızım	Katılıyorum	Hiçbir Zaman	Bazen	Bazen	Çoğu Zaman	Çoğu Zaman
2022-10-11 14:06:44	0	Kadın	21-30 yaş	Evli	Üniversite	Hemşire/Sağlık Memuru	Cerrahi Klinikleri	0-2 yıl	0-11 ay	Gündüz	Konferans	Hiç Katılmadım	El hijyeni ile ilgili bilgilerimi geliştirmem gerektiğini düşünüyorum.	Su ve sabun	15-30 saniye	İş yükünün fazla olması, Antiseptik solüsyonlar ve sabunların elleri tahriş etmesi	Kesinlikle Katılıyorum	Katılıyorum	Kesinlikle Katılıyorum	Kesinlikle Katılıyorum	Kesinlikle Katılıyorum	Kesinlikle Katılıyorum	Kesinlikle Katılıyorum	Katılıyorum	Kesinlikle Katılıyorum	Kesinlikle Katılıyorum	Kesinlikle Katılıyorum	Kesinlikle Katılıyorum	Kesinlikle Katılıyorum	Kesinlikle Katılıyorum	Kesinlikle Katılıyorum	Kesinlikle Katılıyorum	Kesinlikle Katılıyorum	Katılıyorum	Katılıyorum	Kesinlikle Katılıyorum	Kesinlikle Katılıyorum	Kesinlikle Katılıyorum	Kesinlikle Katılıyorum	Kesinlikle Katılıyorum	Kesinlikle Katılıyorum	Kesinlikle Katılıyorum	Kararsızım	Kesinlikle Katılıyorum	Her Zaman	Her Zaman	Her Zaman	Her Zaman	Her Zaman
2022-10-13 17:08:34	0	Erkek	40-49 yaş	Evli	Yüksek Lisans	Doktor	Cerrahi Klinikleri	3-4 yıl	16 yıl ve üzeri	Gündüz	Katılmadım	Hiç Katılmadım	El hijyeni ile ilgili bilgilerimin yeterli olduğunu düşünüyorum.	Povidon-iyot çözeltileri	30 saniyeden fazla	İş yükünün fazla olması, Zaman kısıtlılığı, Rol model eksikliği	Kesinlikle Katılıyorum	Katılıyorum	Katılıyorum	Katılıyorum	Katılmıyorum	Katılıyorum	Katılıyorum	Katılmıyorum	Katılıyorum	Katılıyorum	Katılıyorum	Katılıyorum	Katılıyorum	Katılıyorum	Katılıyorum	Katılıyorum	Katılıyorum	Katılıyorum	Katılmıyorum	Katılmıyorum	Katılmıyorum	Katılıyorum	Katılıyorum	Katılmıyorum	Katılmıyorum	Katılıyorum	Katılıyorum	Katılıyorum	Sıklıkla	Her Zaman	Sıklıkla	Sıklıkla	Her Zaman
2022-10-14 15:20:02	0	Erkek	21-30 yaş	Bekâr	Lise	Temizlik Personeli	Ameliyathane	3-4 yıl	1-5 yıl	Gündüz	Konferans	Katıldım	El hijyeni ile ilgili bilgilerimin yeterli olduğunu düşünüyorum.	Alkol bazlı el dezenfektanı	15-30 saniye	İş yükünün fazla olması, El hijyeni için gerekli malzemelerin eksikliği, El hijyeni için bilgilendirici tabela, afiş, rehberlerin eksikliği, Antiseptik solüsyonlar ve sabunların elleri tahriş etmesi, Zaman kısıtlılığı, Eldiven giymenin el hijyeni için yeterli olması, El hijyeni ile ilgili yeterli bilgi sahibi olmamam, Rol model eksikliği	Kesinlikle Katılıyorum	Kesinlikle Katılıyorum	Katılıyorum	Katılıyorum	Kesinlikle Katılmıyorum	Kesinlikle Katılıyorum	Kararsızım	Katılmıyorum	Kesinlikle Katılıyorum	Katılıyorum	Katılıyorum	Kesinlikle Katılıyorum	Katılıyorum	Katılıyorum	Kararsızım	Katılıyorum	Katılıyorum	Katılıyorum	Kesinlikle Katılmıyorum	Katılıyorum	Katılıyorum	Kesinlikle Katılıyorum	Kesinlikle Katılıyorum	Kararsızım	Katılmıyorum	Katılıyorum	Katılıyorum	Kesinlikle Katılıyorum	Her Zaman	Her Zaman	Çoğu Zaman	Çoğu Zaman	Çoğu Zaman
2022-10-27 13:59:56	0	Kadın	21-30 yaş	Evli	Yüksekokul	Hemşire/Sağlık Memuru	Ameliyathane	0-2 yıl	1-5 yıl	Gündüz	Kurs	Katıldım	El hijyeni ile ilgili bilgilerimi geliştirmem gerektiğini düşünüyorum.	Su ve sabun	15-30 saniye	İş yükünün fazla olması, El hijyeni için gerekli malzemelerin eksikliği, Zaman kısıtlılığı	Kesinlikle Katılıyorum	Katılıyorum	Kesinlikle Katılıyorum	Katılıyorum	Katılmıyorum	Katılıyorum	Kesinlikle Katılıyorum	Katılmıyorum	Katılıyorum	Katılıyorum	Kesinlikle Katılıyorum	Kesinlikle Katılıyorum	Katılıyorum	Kesinlikle Katılıyorum	Kesinlikle Katılıyorum	Kararsızım	Kararsızım	Katılıyorum	Katılmıyorum	Kararsızım	Kararsızım	Kesinlikle Katılıyorum	Kesinlikle Katılıyorum	Kesinlikle Katılmıyorum	Katılmıyorum	Kesinlikle Katılıyorum	Katılıyorum	Kesinlikle Katılmıyorum	Her Zaman	Her Zaman	Her Zaman	Her Zaman	Her Zaman
2023-07-21 01:10:43	0	Kadın	21-30 yaş	Evli	Yüksek Lisans	Doktor	Cerrahi Klinikleri	3-4 yıl	1-5 yıl	Gündüz/Gece dönüşümlü	Konferans	Katıldım	El hijyeni ile ilgili bilgilerimin yeterli olduğunu düşünüyorum.	Su ve sabun	15-30 saniye	El hijyeni için gerekli malzemelerin eksikliği, Rol model eksikliği	Katılıyorum	Katılıyorum	Katılıyorum	Katılıyorum	Katılmıyorum	Katılıyorum	Katılıyorum	Katılmıyorum	Kesinlikle Katılıyorum	Katılıyorum	Katılıyorum	Katılıyorum	Kesinlikle Katılıyorum	Kesinlikle Katılıyorum	Katılıyorum	Katılıyorum	Katılıyorum	Katılmıyorum	Katılmıyorum	Kesinlikle Katılmıyorum	Katılıyorum	Kesinlikle Katılıyorum	Kesinlikle Katılıyorum	Kesinlikle Katılmıyorum	Kesinlikle Katılmıyorum	Kesinlikle Katılıyorum	Katılıyorum	Katılıyorum	Sıklıkla	Her Zaman	Çoğu Zaman	Bazen	Her Zaman
2023-07-21 01:14:56	0	Erkek	31-39 yaş	Evli	Yüksek Lisans	Doktor	Cerrahi Klinikleri	5 yıl ve üzeri	6-10 yıl	Gündüz	Tıp Fakültesinde Ders Aldık	Katıldım	El hijyeni ile ilgili bilgilerimin yeterli olduğunu düşünüyorum.	Su ve sabun	30 saniyeden fazla	İş yükünün fazla olması, El hijyeni için gerekli malzemelerin eksikliği, Antiseptik solüsyonlar ve sabunların elleri tahriş etmesi, Zaman kısıtlılığı	Kesinlikle Katılıyorum	Katılıyorum	Kesinlikle Katılmıyorum	Katılıyorum	Katılıyorum	Kesinlikle Katılıyorum	Kesinlikle Katılıyorum	Katılıyorum	Kesinlikle Katılıyorum	Kesinlikle Katılmıyorum	Kesinlikle Katılıyorum	Kesinlikle Katılmıyorum	Katılıyorum	Katılıyorum	Katılıyorum	Katılmıyorum	Katılmıyorum	Katılmıyorum	Kesinlikle Katılmıyorum	Kararsızım	Kesinlikle Katılıyorum	Kesinlikle Katılıyorum	Kesinlikle Katılıyorum	Katılmıyorum	Kesinlikle Katılmıyorum	Kesinlikle Katılıyorum	Katılıyorum	Kesinlikle Katılıyorum	Çoğu Zaman	Çoğu Zaman	Sıklıkla	Her Zaman	Her Zaman
2023-07-21 01:37:51	0	Kadın	40-49 yaş	Bekâr	Doktora	Doktor	Cerrahi Klinikleri	3-4 yıl	11-15 yıl	Gündüz/Gece dönüşümlü	Sempozyum	Katıldım	El hijyeni ile ilgili bilgilerimin yeterli olduğunu düşünüyorum.	Su ve sabun	15-30 saniye	İş yükünün fazla olması, El hijyeni için gerekli malzemelerin eksikliği, Antiseptik solüsyonlar ve sabunların elleri tahriş etmesi	Kesinlikle Katılıyorum	Kesinlikle Katılıyorum	Kararsızım	Katılıyorum	Katılmıyorum	Kesinlikle Katılıyorum	Kesinlikle Katılıyorum	Katılmıyorum	Kesinlikle Katılıyorum	Katılıyorum	Katılıyorum	Kararsızım	Katılıyorum	Katılıyorum	Katılıyorum	Katılmıyorum	Katılmıyorum	Kararsızım	Katılmıyorum	Katılıyorum	Katılıyorum	Katılıyorum	Katılıyorum	Katılmıyorum	Kesinlikle Katılmıyorum	Kesinlikle Katılıyorum	Katılıyorum	Kesinlikle Katılıyorum	Çoğu Zaman	Her Zaman	Her Zaman	Çoğu Zaman	Her Zaman
2023-07-21 08:57:05	0	Erkek	40-49 yaş	Evli	Doktora	Doktor	Ameliyathane	5 yıl ve üzeri	16 yıl ve üzeri	Gündüz/Gece dönüşümlü	Kurs	Katıldım	El hijyeni ile ilgili bilgilerimin yeterli olduğunu düşünüyorum.	Alkol bazlı el dezenfektanı	30 saniyeden fazla	İş yükünün fazla olması, El hijyeni için gerekli malzemelerin eksikliği, El hijyeni için bilgilendirici tabela, afiş, rehberlerin eksikliği, Antiseptik solüsyonlar ve sabunların elleri tahriş etmesi, Zaman kısıtlılığı, Rol model eksikliği	Katılıyorum	Katılıyorum	Kararsızım	Kesinlikle Katılıyorum	Kesinlikle Katılmıyorum	Kesinlikle Katılıyorum	Kesinlikle Katılıyorum	Katılmıyorum	Kesinlikle Katılıyorum	Kararsızım	Kesinlikle Katılıyorum	Kesinlikle Katılmıyorum	Kesinlikle Katılıyorum	Katılıyorum	Kesinlikle Katılıyorum	Kesinlikle Katılıyorum	Kesinlikle Katılıyorum	Katılmıyorum	Kesinlikle Katılmıyorum	Katılıyorum	Katılmıyorum	Kesinlikle Katılıyorum	Kesinlikle Katılıyorum	Kesinlikle Katılmıyorum	Kesinlikle Katılmıyorum	Kesinlikle Katılıyorum	Kesinlikle Katılıyorum	Kesinlikle Katılıyorum	Sıklıkla	Sıklıkla	Çoğu Zaman	Çoğu Zaman	Çoğu Zaman
2023-07-21 09:01:57	0	Erkek	31-39 yaş	Evli	Doktora	Doktor	Ameliyathane	5 yıl ve üzeri	6-10 yıl	Gündüz	Konferans	Hiç Katılmadım	El hijyeni ile ilgili bilgilerimin yeterli olduğunu düşünüyorum.	Su ve sabun	30 saniyeden fazla	İş yükünün fazla olması, Zaman kısıtlılığı	Kesinlikle Katılıyorum	Katılmıyorum	Kesinlikle Katılmıyorum	Kararsızım	Katılmıyorum	Kesinlikle Katılıyorum	Kesinlikle Katılıyorum	Katılmıyorum	Kesinlikle Katılıyorum	Katılıyorum	Kesinlikle Katılıyorum	Kesinlikle Katılmıyorum	Kesinlikle Katılıyorum	Kesinlikle Katılıyorum	Katılıyorum	Katılmıyorum	Katılmıyorum	Katılıyorum	Kararsızım	Kesinlikle Katılmıyorum	Katılıyorum	Kesinlikle Katılıyorum	Kesinlikle Katılıyorum	Kesinlikle Katılmıyorum	Kesinlikle Katılmıyorum	Kesinlikle Katılıyorum	Katılıyorum	Kesinlikle Katılıyorum	Çoğu Zaman	Her Zaman	Çoğu Zaman	Her Zaman	Her Zaman
2023-07-21 09:30:52	0	Kadın	31-39 yaş	Bekâr	Yüksek Lisans	Doktor	Cerrahi Klinikleri	5 yıl ve üzeri	11-15 yıl	Gündüz/Gece dönüşümlü	Kurum İçi Egitim	Katıldım	El hijyeni ile ilgili bilgilerimin yeterli olduğunu düşünüyorum.	Povidon-iyot çözeltileri	30 saniyeden fazla	Antiseptik solüsyonlar ve sabunların elleri tahriş etmesi	Kararsızım	Katılıyorum	Katılıyorum	Katılıyorum	Kesinlikle Katılmıyorum	Kesinlikle Katılıyorum	Kesinlikle Katılıyorum	Katılmıyorum	Kesinlikle Katılıyorum	Kesinlikle Katılıyorum	Kesinlikle Katılıyorum	Kesinlikle Katılıyorum	Katılıyorum	Kesinlikle Katılıyorum	Kesinlikle Katılıyorum	Kararsızım	Katılmıyorum	Kesinlikle Katılmıyorum	Kesinlikle Katılmıyorum	Kararsızım	Kararsızım	Kesinlikle Katılıyorum	Kesinlikle Katılıyorum	Kesinlikle Katılmıyorum	Kesinlikle Katılmıyorum	Kesinlikle Katılıyorum	Kararsızım	Kesinlikle Katılmıyorum	Her Zaman	Her Zaman	Her Zaman	Her Zaman	Her Zaman
2023-07-21 11:18:21	0	Kadın	50 ve üzeri yaş	Evli	Doktora	Doktor	Cerrahi Klinikleri	5 yıl ve üzeri	16 yıl ve üzeri	Gündüz	Katılmadım	Hiç Katılmadım	El hijyeni ile ilgili bilgilerimin yeterli olduğunu düşünüyorum.	Su ve sabun	15-30 saniye	İş yükünün fazla olması, El hijyeni için bilgilendirici tabela, afiş, rehberlerin eksikliği	Kesinlikle Katılıyorum	Kararsızım	Kesinlikle Katılmıyorum	Kesinlikle Katılıyorum	Katılmıyorum	Kesinlikle Katılıyorum	Kesinlikle Katılıyorum	Katılmıyorum	Kesinlikle Katılıyorum	Kesinlikle Katılıyorum	Kesinlikle Katılıyorum	Kesinlikle Katılıyorum	Katılıyorum	Katılıyorum	Kesinlikle Katılıyorum	Katılıyorum	Katılıyorum	Kararsızım	Katılmıyorum	Kararsızım	Katılıyorum	Kesinlikle Katılıyorum	Kesinlikle Katılıyorum	Kesinlikle Katılmıyorum	Kesinlikle Katılmıyorum	Kesinlikle Katılıyorum	Katılıyorum	Kesinlikle Katılıyorum	Sıklıkla	Sıklıkla	Sıklıkla	Her Zaman	Her Zaman
2023-07-21 11:35:01	0	Erkek	21-30 yaş	Evli	Yüksek Lisans	Doktor	Ameliyathane	3-4 yıl	1-5 yıl	Gündüz/Gece dönüşümlü	Konferans	Katıldım	El hijyeni ile ilgili bilgilerimin yeterli olduğunu düşünüyorum.	Alkol bazlı el dezenfektanı	30 saniyeden fazla	İş yükünün fazla olması, El hijyeni için gerekli malzemelerin eksikliği, El hijyeni için bilgilendirici tabela, afiş, rehberlerin eksikliği	Kesinlikle Katılıyorum	Kesinlikle Katılıyorum	Kararsızım	Katılıyorum	Kesinlikle Katılmıyorum	Kesinlikle Katılıyorum	Kesinlikle Katılıyorum	Katılmıyorum	Katılıyorum	Katılıyorum	Katılıyorum	Kararsızım	Katılıyorum	Katılıyorum	Kesinlikle Katılıyorum	Katılıyorum	Katılıyorum	Katılmıyorum	Katılıyorum	Katılmıyorum	Kararsızım	Kesinlikle Katılıyorum	Katılıyorum	Kesinlikle Katılmıyorum	Kesinlikle Katılmıyorum	Katılıyorum	Katılmıyorum	Katılıyorum	Her Zaman	Çoğu Zaman	Çoğu Zaman	Her Zaman	Her Zaman
2023-07-21 13:43:49	0	Erkek	21-30 yaş	Evli	Yüksek Lisans	Doktor	YBÜ	0-2 yıl	1-5 yıl	Gündüz/Gece dönüşümlü	Konferans	Katıldım	El hijyeni ile ilgili bilgilerimi geliştirmem gerektiğini düşünüyorum.	Alkol bazlı el dezenfektanı	30 saniyeden fazla	İş yükünün fazla olması, Antiseptik solüsyonlar ve sabunların elleri tahriş etmesi, Zaman kısıtlılığı	Katılıyorum	Katılıyorum	Katılıyorum	Katılıyorum	Kesinlikle Katılmıyorum	Katılıyorum	Katılıyorum	Katılmıyorum	Kesinlikle Katılıyorum	Katılıyorum	Kesinlikle Katılıyorum	Kararsızım	Katılıyorum	Katılıyorum	Kararsızım	Katılmıyorum	Katılmıyorum	Katılmıyorum	Katılmıyorum	Katılmıyorum	Kararsızım	Kesinlikle Katılıyorum	Kesinlikle Katılıyorum	Katılmıyorum	Kesinlikle Katılmıyorum	Katılıyorum	Katılıyorum	Katılıyorum	Her Zaman	Her Zaman	Çoğu Zaman	Her Zaman	Her Zaman
2023-07-26 12:40:06	0	Kadın	40-49 yaş	Evli	Yüksek Lisans	Doktor	Cerrahi Klinikleri	0-2 yıl	16 yıl ve üzeri	Gündüz/Gece dönüşümlü	Konferans	Katıldım	El hijyeni ile ilgili bilgilerimin yeterli olduğunu düşünüyorum.	Su ve sabun	30 saniyeden fazla	İş yükünün fazla olması	Katılmıyorum	Katılmıyorum	Katılmıyorum	Katılmıyorum	Katılmıyorum	Kesinlikle Katılıyorum	Kesinlikle Katılıyorum	Katılmıyorum	Katılıyorum	Katılıyorum	Katılıyorum	Katılmıyorum	Kesinlikle Katılıyorum	Kesinlikle Katılıyorum	Katılıyorum	Katılmıyorum	Katılmıyorum	Katılıyorum	Katılmıyorum	Katılmıyorum	Kararsızım	Katılıyorum	Kesinlikle Katılıyorum	Katılmıyorum	Katılmıyorum	Kesinlikle Katılıyorum	Katılıyorum	Katılıyorum	Çoğu Zaman	Çoğu Zaman	Çoğu Zaman	Her Zaman	Çoğu Zaman
2023-07-31 12:33:07	0	Erkek	31-39 yaş	Bekâr	Yüksek Lisans	Doktor	Ameliyathane	3-4 yıl	6-10 yıl	Gündüz/Gece dönüşümlü	Katılmadım	Hiç Katılmadım	El hijyeni ile ilgili bilgilerimin yeterli olduğunu düşünüyorum.	Alkol bazlı el dezenfektanı	15 saniyeden az	İş yükünün fazla olması	Katılıyorum	Katılıyorum	Katılıyorum	Katılıyorum	Katılıyorum	Katılıyorum	Katılıyorum	Katılıyorum	Kararsızım	Katılıyorum	Katılıyorum	Katılıyorum	Kararsızım	Kararsızım	Katılıyorum	Katılıyorum	Katılıyorum	Katılıyorum	Kararsızım	Katılıyorum	Katılıyorum	Katılıyorum	Katılıyorum	Katılıyorum	Katılıyorum	Katılıyorum	Katılıyorum	Katılıyorum	Sıklıkla	Sıklıkla	Sıklıkla	Bazen	Bazen
2023-07-31 12:34:15	0	Erkek	31-39 yaş	Evli	Yüksek Lisans	Doktor	Cerrahi Klinikleri	0-2 yıl	6-10 yıl	Gündüz/Gece dönüşümlü	Konferans	Katıldım	El hijyeni ile ilgili bilgilerimin yeterli olduğunu düşünüyorum.	Su ve sabun	30 saniyeden fazla	İş yükünün fazla olması	Katılıyorum	Kesinlikle Katılıyorum	Kesinlikle Katılıyorum	Kesinlikle Katılıyorum	Katılıyorum	Kesinlikle Katılıyorum	Kesinlikle Katılıyorum	Katılıyorum	Katılıyorum	Kesinlikle Katılıyorum	Kesinlikle Katılıyorum	Kesinlikle Katılıyorum	Kesinlikle Katılıyorum	Katılıyorum	Kesinlikle Katılıyorum	Kesinlikle Katılıyorum	Kesinlikle Katılıyorum	Kesinlikle Katılıyorum	Kararsızım	Kesinlikle Katılıyorum	Kesinlikle Katılıyorum	Kesinlikle Katılıyorum	Kesinlikle Katılıyorum	Kesinlikle Katılmıyorum	Kesinlikle Katılmıyorum	Katılıyorum	Kesinlikle Katılıyorum	Kesinlikle Katılıyorum	Çoğu Zaman	Çoğu Zaman	Çoğu Zaman	Her Zaman	Her Zaman
2023-07-31 12:35:28	0	Erkek	31-39 yaş	Evli	Yüksek Lisans	Doktor	Ameliyathane	3-4 yıl	6-10 yıl	Gündüz/Gece dönüşümlü	Konferans	Katıldım	El hijyeni ile ilgili bilgilerimi geliştirmem gerektiğini düşünüyorum.	Su ve sabun	15-30 saniye	İş yükünün fazla olması, Antiseptik solüsyonlar ve sabunların elleri tahriş etmesi, Zaman kısıtlılığı	Katılmıyorum	Katılmıyorum	Kararsızım	Kararsızım	Kararsızım	Kararsızım	Kararsızım	Kararsızım	Kararsızım	Kararsızım	Kararsızım	Kararsızım	Kararsızım	Kararsızım	Kararsızım	Kararsızım	Kararsızım	Kararsızım	Kararsızım	Kararsızım	Kararsızım	Kararsızım	Kararsızım	Kararsızım	Kararsızım	Kararsızım	Kararsızım	Kararsızım	Sıklıkla	Sıklıkla	Sıklıkla	Sıklıkla	Sıklıkla
2023-07-31 12:35:49	0	Erkek	21-30 yaş	Bekâr	Yüksekokul	Hemşire/Sağlık Memuru	Ameliyathane	0-2 yıl	0-11 ay	Gündüz/Gece dönüşümlü	Konferans	Katıldım	El hijyeni ile ilgili bilgilerimin yeterli olduğunu düşünüyorum.	Su ve sabun	15-30 saniye	Zaman kısıtlılığı	Kesinlikle Katılıyorum	Kesinlikle Katılıyorum	Kesinlikle Katılıyorum	Kesinlikle Katılıyorum	Kesinlikle Katılıyorum	Kesinlikle Katılıyorum	Kesinlikle Katılıyorum	Kesinlikle Katılmıyorum	Kesinlikle Katılıyorum	Kesinlikle Katılıyorum	Kesinlikle Katılıyorum	Kararsızım	Kararsızım	Kesinlikle Katılıyorum	Kesinlikle Katılıyorum	Kesinlikle Katılıyorum	Kesinlikle Katılıyorum	Kesinlikle Katılıyorum	Katılmıyorum	Kesinlikle Katılmıyorum	Kararsızım	Kesinlikle Katılıyorum	Kesinlikle Katılıyorum	Kesinlikle Katılmıyorum	Kesinlikle Katılmıyorum	Kesinlikle Katılıyorum	Kararsızım	Kesinlikle Katılmıyorum	Her Zaman	Her Zaman	Her Zaman	Her Zaman	Her Zaman
2023-07-31 12:41:00	0	Erkek	21-30 yaş	Bekâr	Yüksek Lisans	Doktor	Ameliyathane	3-4 yıl	1-5 yıl	Gündüz/Gece dönüşümlü	Konferans	Katıldım	El hijyeni ile ilgili bilgilerimin yeterli olduğunu düşünüyorum.	Alkol bazlı el dezenfektanı	15-30 saniye	İş yükünün fazla olması, El hijyeni için gerekli malzemelerin eksikliği, Zaman kısıtlılığı	Kesinlikle Katılıyorum	Kesinlikle Katılıyorum	Kesinlikle Katılıyorum	Kesinlikle Katılıyorum	Kesinlikle Katılmıyorum	Kesinlikle Katılıyorum	Kesinlikle Katılıyorum	Katılmıyorum	Kesinlikle Katılıyorum	Kesinlikle Katılıyorum	Kesinlikle Katılıyorum	Kararsızım	Kesinlikle Katılıyorum	Kesinlikle Katılıyorum	Kesinlikle Katılıyorum	Katılıyorum	Katılıyorum	Kesinlikle Katılmıyorum	Kesinlikle Katılıyorum	Kesinlikle Katılmıyorum	Katılmıyorum	Kesinlikle Katılıyorum	Katılıyorum	Kesinlikle Katılmıyorum	Kesinlikle Katılmıyorum	Kesinlikle Katılıyorum	Kararsızım	Kesinlikle Katılıyorum	Her Zaman	Her Zaman	Her Zaman	Her Zaman	Her Zaman
2023-07-31 12:41:14	0	Erkek	21-30 yaş	Bekâr	Yüksek Lisans	Doktor	Ameliyathane	0-2 yıl	0-11 ay	Gündüz/Gece dönüşümlü	Katılmadım	Hiç Katılmadım	El hijyeni ile ilgili bilgilerimin yeterli olduğunu düşünüyorum.	Su ve sabun	30 saniyeden fazla	İş yükünün fazla olması, El hijyeni için gerekli malzemelerin eksikliği, Antiseptik solüsyonlar ve sabunların elleri tahriş etmesi	Kesinlikle Katılıyorum	Kesinlikle Katılıyorum	Kararsızım	Kararsızım	Kesinlikle Katılmıyorum	Kesinlikle Katılıyorum	Kesinlikle Katılıyorum	Kararsızım	Kesinlikle Katılıyorum	Kesinlikle Katılıyorum	Kesinlikle Katılıyorum	Katılmıyorum	Kesinlikle Katılıyorum	Kesinlikle Katılıyorum	Kesinlikle Katılıyorum	Kesinlikle Katılıyorum	Kesinlikle Katılıyorum	Katılıyorum	Kesinlikle Katılmıyorum	Kesinlikle Katılmıyorum	Kesinlikle Katılmıyorum	Kesinlikle Katılıyorum	Kesinlikle Katılıyorum	Kesinlikle Katılmıyorum	Kesinlikle Katılmıyorum	Kesinlikle Katılıyorum	Kesinlikle Katılmıyorum	Kesinlikle Katılmıyorum	Her Zaman	Her Zaman	Her Zaman	Her Zaman	Her Zaman
2023-07-31 12:46:42	0	Kadın	21-30 yaş	Evli	Yüksek Lisans	Doktor	Ameliyathane	0-2 yıl	1-5 yıl	Gündüz/Gece dönüşümlü	Kurum İçi Egitim	Katıldım	El hijyeni ile ilgili bilgilerimin yeterli olduğunu düşünüyorum.	Klorkeksidin	15-30 saniye	Antiseptik solüsyonlar ve sabunların elleri tahriş etmesi	Kesinlikle Katılıyorum	Kesinlikle Katılıyorum	Kesinlikle Katılıyorum	Kesinlikle Katılıyorum	Kararsızım	Katılıyorum	Kesinlikle Katılıyorum	Katılıyorum	Kesinlikle Katılıyorum	Kesinlikle Katılıyorum	Kesinlikle Katılıyorum	Kararsızım	Katılıyorum	Kesinlikle Katılıyorum	Kesinlikle Katılıyorum	Katılmıyorum	Katılmıyorum	Katılıyorum	Katılmıyorum	Katılıyorum	Kesinlikle Katılıyorum	Katılıyorum	Katılıyorum	Katılmıyorum	Kesinlikle Katılmıyorum	Katılıyorum	Katılıyorum	Kesinlikle Katılıyorum	Her Zaman	Her Zaman	Çoğu Zaman	Her Zaman	Her Zaman
2023-07-31 12:54:36	0	Kadın	21-30 yaş	Bekâr	Üniversite	Hemşire/Sağlık Memuru	Ameliyathane	3-4 yıl	1-5 yıl	Gündüz/Gece dönüşümlü	Konferans	Hiç Katılmadım	El hijyeni ile ilgili bilgilerimi geliştirmem gerektiğini düşünüyorum.	Su ve sabun	15 saniyeden az	Zaman kısıtlılığı	Katılıyorum	Katılmıyorum	Katılmıyorum	Katılıyorum	Katılıyorum	Katılıyorum	Katılıyorum	Katılıyorum	Katılıyorum	Katılıyorum	Katılıyorum	Katılıyorum	Katılıyorum	Katılıyorum	Katılıyorum	Katılıyorum	Katılıyorum	Kararsızım	Katılmıyorum	Katılıyorum	Katılıyorum	Katılıyorum	Katılıyorum	Katılmıyorum	Katılmıyorum	Katılıyorum	Katılıyorum	Katılıyorum	Çoğu Zaman	Çoğu Zaman	Sıklıkla	Çoğu Zaman	Çoğu Zaman
2023-07-31 13:19:19	0	Kadın	50 ve üzeri yaş	Evli	Doktora	Doktor	Ameliyathane	0-2 yıl	16 yıl ve üzeri	Gündüz/Gece dönüşümlü	Konferans	Katıldım	El hijyeni ile ilgili bilgilerimin yeterli olduğunu düşünüyorum.	Su ve sabun	15-30 saniye	Antiseptik solüsyonlar ve sabunların elleri tahriş etmesi, Zaman kısıtlılığı	Katılıyorum	Kesinlikle Katılıyorum	Katılıyorum	Kesinlikle Katılıyorum	Katılmıyorum	Kesinlikle Katılıyorum	Kesinlikle Katılıyorum	Katılmıyorum	Kesinlikle Katılıyorum	Katılıyorum	Kesinlikle Katılıyorum	Kesinlikle Katılıyorum	Kesinlikle Katılıyorum	Kesinlikle Katılıyorum	Kesinlikle Katılıyorum	Katılmıyorum	Katılmıyorum	Katılmıyorum	Kesinlikle Katılmıyorum	Kesinlikle Katılmıyorum	Katılıyorum	Kesinlikle Katılıyorum	Kesinlikle Katılıyorum	Kesinlikle Katılmıyorum	Kesinlikle Katılmıyorum	Kesinlikle Katılıyorum	Kesinlikle Katılıyorum	Kesinlikle Katılıyorum	Her Zaman	Her Zaman	Her Zaman	Her Zaman	Bazen
2023-07-31 13:25:07	0	Erkek	40-49 yaş	Evli	Doktora	Doktor	Ameliyathane	5 yıl ve üzeri	16 yıl ve üzeri	Gündüz/Gece dönüşümlü	Katılmadım	Katıldım	El hijyeni ile ilgili bilgilerimin yeterli olduğunu düşünüyorum.	Su ve sabun	30 saniyeden fazla	İş yükünün fazla olması, El hijyeni için gerekli malzemelerin eksikliği, Antiseptik solüsyonlar ve sabunların elleri tahriş etmesi	Kesinlikle Katılıyorum	Kesinlikle Katılıyorum	Kesinlikle Katılıyorum	Kesinlikle Katılıyorum	Kesinlikle Katılmıyorum	Kesinlikle Katılıyorum	Kesinlikle Katılıyorum	Kesinlikle Katılmıyorum	Kesinlikle Katılıyorum	Kesinlikle Katılıyorum	Kesinlikle Katılıyorum	Kesinlikle Katılıyorum	Kesinlikle Katılıyorum	Kesinlikle Katılıyorum	Kesinlikle Katılıyorum	Kesinlikle Katılıyorum	Kesinlikle Katılıyorum	Katılmıyorum	Katılmıyorum	Kesinlikle Katılmıyorum	Katılıyorum	Katılıyorum	Kesinlikle Katılıyorum	Kesinlikle Katılmıyorum	Kesinlikle Katılmıyorum	Kesinlikle Katılıyorum	Katılıyorum	Katılıyorum	Her Zaman	Her Zaman	Her Zaman	Her Zaman	Her Zaman
2023-07-31 13:25:58	0	Kadın	40-49 yaş	Evli	Doktora	Doktor	Ameliyathane	5 yıl ve üzeri	11-15 yıl	Gündüz	Katılmadım	Hiç Katılmadım	El hijyeni ile ilgili bilgilerimin yeterli olduğunu düşünüyorum.	Su ve sabun	30 saniyeden fazla	İş yükünün fazla olması, El hijyeni için bilgilendirici tabela, afiş, rehberlerin eksikliği, Antiseptik solüsyonlar ve sabunların elleri tahriş etmesi, Zaman kısıtlılığı	Katılıyorum	Kararsızım	Katılıyorum	Kesinlikle Katılıyorum	Kesinlikle Katılmıyorum	Kesinlikle Katılıyorum	Kesinlikle Katılıyorum	Kesinlikle Katılmıyorum	Kesinlikle Katılıyorum	Kararsızım	Kesinlikle Katılıyorum	Kararsızım	Kesinlikle Katılıyorum	Kesinlikle Katılıyorum	Kesinlikle Katılıyorum	Kesinlikle Katılıyorum	Kesinlikle Katılıyorum	Katılıyorum	Kesinlikle Katılmıyorum	Katılmıyorum	Katılmıyorum	Kesinlikle Katılıyorum	Kesinlikle Katılıyorum	Kesinlikle Katılmıyorum	Kesinlikle Katılmıyorum	Kesinlikle Katılıyorum	Kararsızım	Katılıyorum	Her Zaman	Her Zaman	Her Zaman	Her Zaman	Her Zaman
2023-07-31 13:26:06	0	Kadın	21-30 yaş	Bekâr	Yüksekokul	Hemşire/Sağlık Memuru	Ameliyathane	0-2 yıl	0-11 ay	Gündüz	Konferans	Katıldım	El hijyeni ile ilgili bilgilerimin yeterli olduğunu düşünüyorum.	Su ve sabun	15-30 saniye	Antiseptik solüsyonlar ve sabunların elleri tahriş etmesi	Katılıyorum	Katılıyorum	Katılmıyorum	Katılıyorum	Kararsızım	Kesinlikle Katılıyorum	Kesinlikle Katılıyorum	Katılmıyorum	Katılıyorum	Katılıyorum	Kesinlikle Katılıyorum	Katılıyorum	Katılıyorum	Katılıyorum	Katılıyorum	Katılıyorum	Katılıyorum	Katılmıyorum	Kesinlikle Katılmıyorum	Katılıyorum	Katılıyorum	Kesinlikle Katılıyorum	Kesinlikle Katılıyorum	Katılmıyorum	Katılmıyorum	Katılıyorum	Katılıyorum	Katılmıyorum	Bazen	Sıklıkla	Bazen	Sıklıkla	Sıklıkla
2023-07-31 13:33:54	0	Erkek	31-39 yaş	Evli	Doktora	Doktor	Cerrahi Klinikleri	0-2 yıl	6-10 yıl	Gündüz/Gece dönüşümlü	Sempozyum	Katıldım	El hijyeni ile ilgili bilgilerimin yeterli olduğunu düşünüyorum.	Su ve sabun	30 saniyeden fazla	İş yükünün fazla olması, Antiseptik solüsyonlar ve sabunların elleri tahriş etmesi, Zaman kısıtlılığı	Katılıyorum	Katılıyorum	Katılmıyorum	Katılıyorum	Katılmıyorum	Katılıyorum	Katılıyorum	Katılmıyorum	Katılıyorum	Katılıyorum	Katılıyorum	Katılıyorum	Katılıyorum	Katılıyorum	Katılıyorum	Katılıyorum	Katılıyorum	Katılıyorum	Katılmıyorum	Kararsızım	Katılıyorum	Katılıyorum	Katılıyorum	Katılmıyorum	Kesinlikle Katılmıyorum	Katılıyorum	Katılıyorum	Katılıyorum	Sıklıkla	Sıklıkla	Sıklıkla	Sıklıkla	Sıklıkla
2023-07-31 13:34:28	0	Erkek	50 ve üzeri yaş	Evli	Doktora	Doktor	Ameliyathane	0-2 yıl	16 yıl ve üzeri	Gündüz/Gece dönüşümlü	Kurum İçi Egitim	Katıldım	El hijyeni ile ilgili bilgilerimin yeterli olduğunu düşünüyorum.	Su ve sabun	30 saniyeden fazla	İş yükünün fazla olması, El hijyeni için gerekli malzemelerin eksikliği, Antiseptik solüsyonlar ve sabunların elleri tahriş etmesi	Kesinlikle Katılıyorum	Kesinlikle Katılıyorum	Kesinlikle Katılıyorum	Kesinlikle Katılıyorum	Katılmıyorum	Katılıyorum	Kesinlikle Katılıyorum	Kesinlikle Katılıyorum	Kesinlikle Katılıyorum	Kesinlikle Katılıyorum	Kesinlikle Katılıyorum	Katılıyorum	Katılıyorum	Kesinlikle Katılıyorum	Kesinlikle Katılıyorum	Kesinlikle Katılıyorum	Kesinlikle Katılıyorum	Kesinlikle Katılmıyorum	Katılmıyorum	Kesinlikle Katılmıyorum	Katılıyorum	Katılıyorum	Katılıyorum	Katılmıyorum	Katılmıyorum	Katılıyorum	Katılıyorum	Katılıyorum	Her Zaman	Her Zaman	Her Zaman	Her Zaman	Her Zaman
2023-07-31 13:35:37	0	Kadın	40-49 yaş	Bekâr	Yüksek Lisans	Doktor	Ameliyathane	0-2 yıl	16 yıl ve üzeri	Gündüz/Gece dönüşümlü	Katılmadım	Hiç Katılmadım	El hijyeni ile ilgili bilgilerimin yeterli olduğunu düşünüyorum.	Alkol bazlı el dezenfektanı	15-30 saniye	İş yükünün fazla olması, El hijyeni için gerekli malzemelerin eksikliği	Kesinlikle Katılıyorum	Kararsızım	Katılmıyorum	Kesinlikle Katılıyorum	Kesinlikle Katılmıyorum	Kesinlikle Katılıyorum	Kesinlikle Katılıyorum	Kesinlikle Katılmıyorum	Kesinlikle Katılıyorum	Katılmıyorum	Kesinlikle Katılıyorum	Kararsızım	Kesinlikle Katılıyorum	Kesinlikle Katılıyorum	Katılıyorum	Kesinlikle Katılıyorum	Kesinlikle Katılıyorum	Katılıyorum	Katılmıyorum	Katılmıyorum	Katılmıyorum	Kesinlikle Katılıyorum	Kesinlikle Katılıyorum	Katılmıyorum	Katılmıyorum	Kesinlikle Katılıyorum	Katılıyorum	Kesinlikle Katılıyorum	Sıklıkla	Her Zaman	Her Zaman	Sıklıkla	Her Zaman
2023-07-31 13:38:41	0	Kadın	40-49 yaş	Bekâr	Üniversite	Hemşire/Sağlık Memuru	Ameliyathane	5 yıl ve üzeri	16 yıl ve üzeri	Gündüz/Gece dönüşümlü	Kurum İçi Egitim	Katıldım	El hijyeni ile ilgili bilgilerimin yeterli olduğunu düşünüyorum.	Su ve sabun	30 saniyeden fazla	El hijyeni için gerekli malzemelerin eksikliği	Kesinlikle Katılıyorum	Katılıyorum	Katılıyorum	Katılıyorum	Kararsızım	Katılıyorum	Katılıyorum	Katılmıyorum	Katılıyorum	Katılıyorum	Katılıyorum	Kararsızım	Katılıyorum	Katılıyorum	Katılıyorum	Katılmıyorum	Katılmıyorum	Katılmıyorum	Katılıyorum	Kararsızım	Katılıyorum	Katılıyorum	Katılıyorum	Kesinlikle Katılmıyorum	Kesinlikle Katılmıyorum	Kesinlikle Katılıyorum	Katılmıyorum	Katılıyorum	Her Zaman	Her Zaman	Her Zaman	Her Zaman	Her Zaman
2023-07-31 13:41:15	0	Erkek	31-39 yaş	Evli	Lise	Temizlik Personeli	Ameliyathane	5 yıl ve üzeri	16 yıl ve üzeri	Gündüz	Kurum İçi Egitim	Katıldım	El hijyeni ile ilgili bilgilerimin yeterli olduğunu düşünüyorum.	Su ve sabun	30 saniyeden fazla	İş yükünün fazla olması, El hijyeni için bilgilendirici tabela, afiş, rehberlerin eksikliği	Kesinlikle Katılıyorum	Kesinlikle Katılıyorum	Katılıyorum	Kararsızım	Kesinlikle Katılmıyorum	Katılıyorum	Katılıyorum	Katılıyorum	Kesinlikle Katılıyorum	Katılıyorum	Kesinlikle Katılıyorum	Kararsızım	Katılıyorum	Kesinlikle Katılıyorum	Kararsızım	Katılıyorum	Katılıyorum	Katılıyorum	Katılıyorum	Katılıyorum	Kararsızım	Kesinlikle Katılıyorum	Kesinlikle Katılıyorum	Kesinlikle Katılmıyorum	Kesinlikle Katılmıyorum	Kararsızım	Katılıyorum	Kesinlikle Katılıyorum	Sıklıkla	Her Zaman	Her Zaman	Çoğu Zaman	Her Zaman
2023-07-31 14:15:53	0	Erkek	50 ve üzeri yaş	Evli	Üniversite	Hemşire/Sağlık Memuru	Ameliyathane	5 yıl ve üzeri	16 yıl ve üzeri	Gündüz/Gece dönüşümlü	Konferans	Hiç Katılmadım	El hijyeni ile ilgili bilgilerimin yetersiz olduğunu düşünüyorum.	Su ve sabun	15-30 saniye	İş yükünün fazla olması, Antiseptik solüsyonlar ve sabunların elleri tahriş etmesi,	Kesinlikle Katılıyorum	Katılıyorum	Katılmıyorum	Kesinlikle Katılmıyorum	Kesinlikle Katılıyorum	Katılmıyorum	Kesinlikle Katılıyorum	Katılıyorum	Katılıyorum	Katılıyorum	Kesinlikle Katılıyorum	Kesinlikle Katılıyorum	Katılıyorum	Kesinlikle Katılıyorum	Kararsızım	Kesinlikle Katılıyorum	Kesinlikle Katılıyorum	Kesinlikle Katılıyorum	Katılıyorum	Kesinlikle Katılıyorum	Kesinlikle Katılıyorum	Katılıyorum	Kesinlikle Katılıyorum	Kesinlikle Katılmıyorum	Kesinlikle Katılmıyorum	Katılıyorum	Kesinlikle Katılmıyorum	Kesinlikle Katılmıyorum	Sıklıkla	Sıklıkla	Sıklıkla	Sıklıkla	Sıklıkla
2023-07-31 14:25:37	0	Kadın	21-30 yaş	Bekâr	Üniversite	Hemşire/Sağlık Memuru	Ameliyathane	0-2 yıl	0-11 ay	Gündüz	Konferans	Katıldım	El hijyeni ile ilgili bilgilerimin yeterli olduğunu düşünüyorum.	Povidon-iyot çözeltileri	30 saniyeden fazla	Antiseptik solüsyonlar ve sabunların elleri tahriş etmesi, Zaman kısıtlılığı	Kesinlikle Katılıyorum	Kesinlikle Katılıyorum	Kesinlikle Katılıyorum	Katılıyorum	Katılmıyorum	Katılıyorum	Kesinlikle Katılıyorum	Katılıyorum	Kesinlikle Katılıyorum	Kesinlikle Katılıyorum	Kesinlikle Katılıyorum	Kararsızım	Kesinlikle Katılıyorum	Kesinlikle Katılıyorum	Kesinlikle Katılıyorum	Kesinlikle Katılıyorum	Kesinlikle Katılıyorum	Kararsızım	Kesinlikle Katılmıyorum	Kesinlikle Katılıyorum	Kesinlikle Katılıyorum	Kesinlikle Katılıyorum	Kesinlikle Katılıyorum	Kesinlikle Katılmıyorum	Kesinlikle Katılmıyorum	Kesinlikle Katılıyorum	Kararsızım	Kesinlikle Katılıyorum	Çoğu Zaman	Her Zaman	Her Zaman	Her Zaman	Her Zaman
2023-08-01 00:38:34	0	Erkek	40-49 yaş	Evli	Üniversite	Hemşire/Sağlık Memuru	Ameliyathane	5 yıl ve üzeri	16 yıl ve üzeri	Gündüz/Gece dönüşümlü	Konferans	Katıldım	El hijyeni ile ilgili bilgilerimin yeterli olduğunu düşünüyorum.	Su ve sabun	30 saniyeden fazla	El hijyeni için gerekli malzemelerin eksikliği, El hijyeni için bilgilendirici tabela, afiş, rehberlerin eksikliği	Kesinlikle Katılmıyorum	Kesinlikle Katılıyorum	Katılıyorum	Katılıyorum	Kesinlikle Katılmıyorum	Kesinlikle Katılıyorum	Kesinlikle Katılıyorum	Kesinlikle Katılmıyorum	Kesinlikle Katılıyorum	Katılıyorum	Kesinlikle Katılıyorum	Katılıyorum	Katılıyorum	Kesinlikle Katılıyorum	Katılıyorum	Katılıyorum	Katılıyorum	Katılıyorum	Kesinlikle Katılmıyorum	Katılıyorum	Katılmıyorum	Kesinlikle Katılıyorum	Kesinlikle Katılıyorum	Kesinlikle Katılmıyorum	Kesinlikle Katılmıyorum	Kesinlikle Katılıyorum	Kesinlikle Katılmıyorum	Kesinlikle Katılıyorum	Her Zaman	Her Zaman	Her Zaman	Her Zaman	Her Zaman
2023-08-02 11:54:32	0	Kadın	40-49 yaş	Evli	Yüksekokul	Hemşire/Sağlık Memuru	Ameliyathane	5 yıl ve üzeri	11-15 yıl	Gündüz	Kurs	Katıldım	El hijyeni ile ilgili bilgilerimin yeterli olduğunu düşünüyorum.	Povidon-iyot çözeltileri	30 saniyeden fazla	İş yükünün fazla olması, Antiseptik solüsyonlar ve sabunların elleri tahriş etmesi, Zaman kısıtlılığı	Katılıyorum	Katılıyorum	Kesinlikle Katılıyorum	Kesinlikle Katılıyorum	Kesinlikle Katılmıyorum	Katılıyorum	Kesinlikle Katılıyorum	Kesinlikle Katılmıyorum	Kesinlikle Katılıyorum	Kararsızım	Kesinlikle Katılıyorum	Kesinlikle Katılıyorum	Kesinlikle Katılıyorum	Kesinlikle Katılıyorum	Kesinlikle Katılıyorum	Kesinlikle Katılıyorum	Katılıyorum	Kesinlikle Katılmıyorum	Kesinlikle Katılıyorum	Kesinlikle Katılmıyorum	Kesinlikle Katılmıyorum	Kesinlikle Katılıyorum	Kesinlikle Katılıyorum	Kesinlikle Katılmıyorum	Kesinlikle Katılmıyorum	Kesinlikle Katılıyorum	Kesinlikle Katılmıyorum	Kesinlikle Katılmıyorum	Her Zaman	Her Zaman	Her Zaman	Her Zaman	Her Zaman
2023-08-02 11:55:22	0	Erkek	40-49 yaş	Evli	Doktora	Doktor	Ameliyathane	5 yıl ve üzeri	16 yıl ve üzeri	Gündüz/Gece dönüşümlü	Kurs	Katıldım	El hijyeni ile ilgili bilgilerimin yeterli olduğunu düşünüyorum.	Povidon-iyot çözeltileri	15-30 saniye	Antiseptik solüsyonlar ve sabunların elleri tahriş etmesi, Zaman kısıtlılığı	Kesinlikle Katılıyorum	Kesinlikle Katılıyorum	Kesinlikle Katılıyorum	Kesinlikle Katılıyorum	Katılmıyorum	Katılıyorum	Kesinlikle Katılıyorum	Katılmıyorum	Katılıyorum	Katılıyorum	Katılıyorum	Katılıyorum	Katılıyorum	Katılıyorum	Katılıyorum	Kararsızım	Kararsızım	Katılmıyorum	Katılmıyorum	Katılmıyorum	Kararsızım	Katılıyorum	Katılıyorum	Katılmıyorum	Katılmıyorum	Katılıyorum	Kararsızım	Katılıyorum	Çoğu Zaman	Çoğu Zaman	Sıklıkla	Çoğu Zaman	Çoğu Zaman
2023-08-02 12:18:16	0	Kadın	40-49 yaş	Evli	Doktora	Doktor	YBÜ	3-4 yıl	16 yıl ve üzeri	Gündüz/Gece dönüşümlü	Konferans	Katıldım	El hijyeni ile ilgili bilgilerimin yeterli olduğunu düşünüyorum.	Su ve sabun	15-30 saniye	İş yükünün fazla olması, El hijyeni için gerekli malzemelerin eksikliği, Antiseptik solüsyonlar ve sabunların elleri tahriş etmesi, Zaman kısıtlılığı	Kesinlikle Katılıyorum	Kesinlikle Katılıyorum	Katılıyorum	Kesinlikle Katılıyorum	Kararsızım	Katılıyorum	Katılıyorum	Katılmıyorum	Kesinlikle Katılıyorum	Katılmıyorum	Katılıyorum	Katılıyorum	Katılıyorum	Kesinlikle Katılıyorum	Katılıyorum	Katılıyorum	Katılıyorum	Katılmıyorum	Katılmıyorum	Kararsızım	Katılıyorum	Kesinlikle Katılıyorum	Kesinlikle Katılıyorum	Kesinlikle Katılmıyorum	Kesinlikle Katılmıyorum	Kesinlikle Katılıyorum	Kesinlikle Katılıyorum	Kesinlikle Katılıyorum	Çoğu Zaman	Çoğu Zaman	Çoğu Zaman	Her Zaman	Her Zaman
2023-08-02 12:25:09	0	Erkek	21-30 yaş	Evli	Yüksek Lisans	Doktor	Ameliyathane	3-4 yıl	1-5 yıl	Gündüz/Gece dönüşümlü	Katılmadım	Hiç Katılmadım	El hijyeni ile ilgili bilgilerimin yeterli olduğunu düşünüyorum.	Su ve sabun	30 saniyeden fazla	İş yükünün fazla olması, El hijyeni için gerekli malzemelerin eksikliği	Kesinlikle Katılıyorum	Kesinlikle Katılıyorum	Katılmıyorum	Kararsızım	Kesinlikle Katılmıyorum	Kesinlikle Katılıyorum	Kesinlikle Katılıyorum	Katılıyorum	Kesinlikle Katılıyorum	Katılıyorum	Katılıyorum	Katılmıyorum	Katılıyorum	Katılıyorum	Kararsızım	Kararsızım	Kararsızım	Kesinlikle Katılıyorum	Kesinlikle Katılmıyorum	Kararsızım	Katılmıyorum	Kesinlikle Katılıyorum	Kesinlikle Katılıyorum	Kesinlikle Katılmıyorum	Kesinlikle Katılmıyorum	Kesinlikle Katılıyorum	Katılıyorum	Kesinlikle Katılıyorum	Bazen	Her Zaman	Çoğu Zaman	Her Zaman	Her Zaman
2023-08-02 12:25:25	0	Kadın	31-39 yaş	Bekâr	Yüksek Lisans	Doktor	Cerrahi Klinikleri	5 yıl ve üzeri	6-10 yıl	Gündüz/Gece dönüşümlü	Tıp Fakültesinde Ders Aldık	Hiç Katılmadım	El hijyeni ile ilgili bilgilerimin yeterli olduğunu düşünüyorum.	Su ve sabun	30 saniyeden fazla	İş yükünün fazla olması	Kesinlikle Katılıyorum	Kesinlikle Katılıyorum	Kesinlikle Katılmıyorum	Kesinlikle Katılıyorum	Kesinlikle Katılmıyorum	Kesinlikle Katılıyorum	Kesinlikle Katılıyorum	Kesinlikle Katılmıyorum	Kesinlikle Katılıyorum	Kesinlikle Katılıyorum	Kesinlikle Katılıyorum	Katılmıyorum	Kesinlikle Katılıyorum	Kesinlikle Katılıyorum	Kesinlikle Katılıyorum	Katılıyorum	Katılıyorum	Katılıyorum	Kesinlikle Katılmıyorum	Katılıyorum	Kesinlikle Katılmıyorum	Kesinlikle Katılıyorum	Kesinlikle Katılıyorum	Kesinlikle Katılmıyorum	Kesinlikle Katılmıyorum	Kesinlikle Katılıyorum	Kesinlikle Katılıyorum	Kesinlikle Katılıyorum	Her Zaman	Her Zaman	Her Zaman	Her Zaman	Her Zaman
2023-08-02 12:27:01	0	Erkek	40-49 yaş	Evli	Doktora	Doktor	Cerrahi Klinikleri	0-2 yıl	16 yıl ve üzeri	Gündüz	Kurs	Katıldım	El hijyeni ile ilgili bilgilerimin yeterli olduğunu düşünüyorum.	Povidon-iyot çözeltileri	30 saniyeden fazla	İş yükünün fazla olması, El hijyeni için gerekli malzemelerin eksikliği, El hijyeni için bilgilendirici tabela, afiş, rehberlerin eksikliği, Antiseptik solüsyonlar ve sabunların elleri tahriş etmesi, Rol model eksikliği	Kesinlikle Katılıyorum	Kesinlikle Katılıyorum	Kesinlikle Katılmıyorum	Kesinlikle Katılıyorum	Kesinlikle Katılmıyorum	Kesinlikle Katılıyorum	Kesinlikle Katılıyorum	Kesinlikle Katılmıyorum	Kesinlikle Katılıyorum	Kesinlikle Katılıyorum	Kesinlikle Katılıyorum	Kesinlikle Katılıyorum	Kesinlikle Katılıyorum	Kesinlikle Katılıyorum	Kesinlikle Katılıyorum	Kesinlikle Katılıyorum	Kesinlikle Katılıyorum	Kesinlikle Katılmıyorum	Kesinlikle Katılmıyorum	Kesinlikle Katılmıyorum	Kararsızım	Kesinlikle Katılıyorum	Kesinlikle Katılıyorum	Kesinlikle Katılmıyorum	Kesinlikle Katılmıyorum	Kesinlikle Katılıyorum	Kesinlikle Katılıyorum	Kesinlikle Katılıyorum	Hiçbir Zaman	Her Zaman	Her Zaman	Her Zaman	Her Zaman
2023-08-02 12:28:32	0	Erkek	40-49 yaş	Evli	Doktora	Doktor	YBÜ	5 yıl ve üzeri	16 yıl ve üzeri	Gündüz	Kurum İçi Egitim	Katıldım	El hijyeni ile ilgili bilgilerimin yeterli olduğunu düşünüyorum.	Su ve sabun	15-30 saniye	İş yükünün fazla olması, Antiseptik solüsyonlar ve sabunların elleri tahriş etmesi	Katılıyorum	Katılıyorum	Katılmıyorum	Kesinlikle Katılıyorum	Kesinlikle Katılmıyorum	Kesinlikle Katılıyorum	Kesinlikle Katılıyorum	Katılmıyorum	Kesinlikle Katılıyorum	Katılmıyorum	Kesinlikle Katılıyorum	Kesinlikle Katılıyorum	Kesinlikle Katılıyorum	Katılıyorum	Katılıyorum	Katılmıyorum	Katılmıyorum	Katılmıyorum	Kesinlikle Katılmıyorum	Kesinlikle Katılmıyorum	Kararsızım	Kesinlikle Katılıyorum	Kesinlikle Katılıyorum	Kesinlikle Katılmıyorum	Kesinlikle Katılmıyorum	Kesinlikle Katılıyorum	Kesinlikle Katılıyorum	Kesinlikle Katılıyorum	Sıklıkla	Her Zaman	Her Zaman	Sıklıkla	Her Zaman
2023-08-02 12:29:51	0	Kadın	31-39 yaş	Evli	Yüksek Lisans	Doktor	Cerrahi Klinikleri	5 yıl ve üzeri	6-10 yıl	Gündüz/Gece dönüşümlü	Konferans	Katıldım	El hijyeni ile ilgili bilgilerimin yeterli olduğunu düşünüyorum.	Klorkeksidin	30 saniyeden fazla	İş yükünün fazla olması, Zaman kısıtlılığı, Rol model eksikliği	Kesinlikle Katılıyorum	Kesinlikle Katılıyorum	Kesinlikle Katılıyorum	Kesinlikle Katılıyorum	Kesinlikle Katılmıyorum	Kesinlikle Katılıyorum	Kesinlikle Katılıyorum	Kesinlikle Katılmıyorum	Kesinlikle Katılıyorum	Katılıyorum	Katılıyorum	Kararsızım	Kesinlikle Katılıyorum	Kesinlikle Katılıyorum	Kesinlikle Katılıyorum	Katılmıyorum	Katılmıyorum	Katılmıyorum	Kesinlikle Katılmıyorum	Kararsızım	Kararsızım	Kesinlikle Katılıyorum	Kesinlikle Katılıyorum	Kesinlikle Katılmıyorum	Kesinlikle Katılmıyorum	Kesinlikle Katılıyorum	Katılıyorum	Kesinlikle Katılıyorum	Her Zaman	Her Zaman	Çoğu Zaman	Her Zaman	Her Zaman
2023-08-02 12:32:40	0	Kadın	40-49 yaş	Evli	Yüksek Lisans	Doktor	Cerrahi Klinikleri	5 yıl ve üzeri	16 yıl ve üzeri	Gündüz/Gece dönüşümlü	Kurum İçi Egitim	Katıldım	El hijyeni ile ilgili bilgilerimin yeterli olduğunu düşünüyorum.	Su ve sabun	15-30 saniye	İş yükünün fazla olması, Antiseptik solüsyonlar ve sabunların elleri tahriş etmesi, Zaman kısıtlılığı	Katılıyorum	Katılıyorum	Katılıyorum	Katılıyorum	Katılmıyorum	Katılıyorum	Katılıyorum	Kararsızım	Katılıyorum	Katılmıyorum	Katılıyorum	Kararsızım	Katılmıyorum	Katılıyorum	Katılıyorum	Katılmıyorum	Katılmıyorum	Katılıyorum	Katılmıyorum	Kararsızım	Katılıyorum	Katılıyorum	Katılıyorum	Katılmıyorum	Katılmıyorum	Katılıyorum	Kararsızım	Katılıyorum	Sıklıkla	Sıklıkla	Sıklıkla	Bazen	Çoğu Zaman
2023-08-02 12:35:08	0	Kadın	40-49 yaş	Evli	Doktora	Doktor	Cerrahi Klinikleri	3-4 yıl	16 yıl ve üzeri	Gündüz	Kurum İçi Egitim	Katıldım	El hijyeni ile ilgili bilgilerimin yeterli olduğunu düşünüyorum.	Su ve sabun	15-30 saniye	İş yükünün fazla olması, Rol model eksikliği	Katılıyorum	Katılıyorum	Katılıyorum	Kesinlikle Katılıyorum	Katılmıyorum	Katılıyorum	Kesinlikle Katılıyorum	Katılmıyorum	Kesinlikle Katılıyorum	Kesinlikle Katılıyorum	Kesinlikle Katılıyorum	Katılıyorum	Katılıyorum	Katılıyorum	Katılıyorum	Katılmıyorum	Katılmıyorum	Kararsızım	Katılmıyorum	Katılmıyorum	Katılıyorum	Katılıyorum	Kesinlikle Katılıyorum	Katılmıyorum	Kesinlikle Katılmıyorum	Kesinlikle Katılıyorum	Kararsızım	Katılıyorum	Bazen	Her Zaman	Her Zaman	Çoğu Zaman	Her Zaman
2023-08-02 12:40:25	0	Kadın	50 ve üzeri yaş	Evli	Doktora	Doktor	Cerrahi Klinikleri	5 yıl ve üzeri	11-15 yıl	Gündüz/Gece dönüşümlü	Konferans	Hiç Katılmadım	El hijyeni ile ilgili bilgilerimin yeterli olduğunu düşünüyorum.	Klorkeksidin	30 saniyeden fazla	Antiseptik solüsyonlar ve sabunların elleri tahriş etmesi	Katılıyorum	Katılıyorum	Kesinlikle Katılıyorum	Katılıyorum	Katılıyorum	Katılıyorum	Katılıyorum	Katılmıyorum	Katılıyorum	Katılıyorum	Katılıyorum	Kesinlikle Katılmıyorum	Kesinlikle Katılıyorum	Katılıyorum	Katılıyorum	Katılmıyorum	Katılmıyorum	Katılmıyorum	Kesinlikle Katılmıyorum	Kesinlikle Katılıyorum	Katılmıyorum	Kesinlikle Katılıyorum	Katılıyorum	Kesinlikle Katılmıyorum	Kesinlikle Katılmıyorum	Kesinlikle Katılıyorum	Kararsızım	Katılmıyorum	Bazen	Her Zaman	Sıklıkla	Her Zaman	Çoğu Zaman
2023-08-02 12:44:17	0	Kadın	50 ve üzeri yaş	Bekâr	Doktora	Doktor	Cerrahi Klinikleri	5 yıl ve üzeri	16 yıl ve üzeri	Gündüz	Kurum İçi Egitim	Katıldım	El hijyeni ile ilgili bilgilerimin yeterli olduğunu düşünüyorum.	Su ve sabun	30 saniyeden fazla	El hijyeni için gerekli malzemelerin eksikliği, Rol model eksikliği	Kesinlikle Katılıyorum	Kesinlikle Katılıyorum	Kararsızım	Kesinlikle Katılıyorum	Kesinlikle Katılmıyorum	Kesinlikle Katılıyorum	Kesinlikle Katılıyorum	Katılmıyorum	Kesinlikle Katılıyorum	Kesinlikle Katılıyorum	Kesinlikle Katılıyorum	Kararsızım	Kesinlikle Katılıyorum	Kesinlikle Katılıyorum	Kesinlikle Katılıyorum	Kesinlikle Katılıyorum	Kesinlikle Katılıyorum	Katılmıyorum	Katılmıyorum	Kararsızım	Katılıyorum	Kesinlikle Katılıyorum	Kesinlikle Katılıyorum	Kesinlikle Katılmıyorum	Kesinlikle Katılmıyorum	Kesinlikle Katılıyorum	Katılıyorum	Katılmıyorum	Çoğu Zaman	Her Zaman	Çoğu Zaman	Her Zaman	Her Zaman
2023-08-02 12:50:59	0	Kadın	31-39 yaş	Evli	Yüksek Lisans	Doktor	YBÜ	3-4 yıl	11-15 yıl	Gündüz/Gece dönüşümlü	Konferans	Katıldım	El hijyeni ile ilgili bilgilerimin yeterli olduğunu düşünüyorum.	Su ve sabun	15-30 saniye	İş yükünün fazla olması, Antiseptik solüsyonlar ve sabunların elleri tahriş etmesi	Kesinlikle Katılıyorum	Katılmıyorum	Kararsızım	Kesinlikle Katılıyorum	Kesinlikle Katılmıyorum	Kesinlikle Katılıyorum	Kesinlikle Katılıyorum	Katılıyorum	Kesinlikle Katılıyorum	Kesinlikle Katılıyorum	Kesinlikle Katılıyorum	Katılmıyorum	Kesinlikle Katılıyorum	Kesinlikle Katılıyorum	Katılmıyorum	Kesinlikle Katılıyorum	Kesinlikle Katılıyorum	Katılıyorum	Kesinlikle Katılmıyorum	Kesinlikle Katılmıyorum	Kesinlikle Katılıyorum	Katılıyorum	Kesinlikle Katılıyorum	Kesinlikle Katılmıyorum	Kesinlikle Katılmıyorum	Kesinlikle Katılıyorum	Katılmıyorum	Kesinlikle Katılmıyorum	Bazen	Sıklıkla	Sıklıkla	Bazen	Sıklıkla
2023-08-02 12:56:29	0	Erkek	21-30 yaş	Evli	Yüksek Lisans	Doktor	Cerrahi Klinikleri	0-2 yıl	1-5 yıl	Gündüz/Gece dönüşümlü	Konferans	Katıldım	El hijyeni ile ilgili bilgilerimin yeterli olduğunu düşünüyorum.	Alkol bazlı el dezenfektanı	15-30 saniye	İş yükünün fazla olması, Zaman kısıtlılığı	Katılıyorum	Katılıyorum	Katılıyorum	Katılıyorum	Katılıyorum	Katılıyorum	Katılıyorum	Katılıyorum	Katılıyorum	Katılıyorum	Katılıyorum	Katılıyorum	Katılıyorum	Katılıyorum	Katılıyorum	Katılıyorum	Katılıyorum	Katılıyorum	Katılıyorum	Katılıyorum	Katılıyorum	Katılıyorum	Katılıyorum	Katılıyorum	Katılıyorum	Katılıyorum	Katılıyorum	Katılıyorum	Bazen	Bazen	Bazen	Bazen	Bazen
2023-08-02 13:00:47	0	Erkek	21-30 yaş	Evli	Doktora	Doktor	Ameliyathane	3-4 yıl	1-5 yıl	Gündüz/Gece dönüşümlü	Kurs	Katıldım	El hijyeni ile ilgili bilgilerimin yeterli olduğunu düşünüyorum.	Su ve sabun	30 saniyeden fazla	El hijyeni için gerekli malzemelerin eksikliği, Antiseptik solüsyonlar ve sabunların elleri tahriş etmesi	Kesinlikle Katılıyorum	Kesinlikle Katılıyorum	Kesinlikle Katılıyorum	Kesinlikle Katılıyorum	Kesinlikle Katılmıyorum	Kesinlikle Katılıyorum	Kesinlikle Katılıyorum	Kesinlikle Katılmıyorum	Kesinlikle Katılıyorum	Kesinlikle Katılıyorum	Kesinlikle Katılıyorum	Kesinlikle Katılıyorum	Kesinlikle Katılıyorum	Kesinlikle Katılıyorum	Kesinlikle Katılıyorum	Kesinlikle Katılıyorum	Kesinlikle Katılıyorum	Kesinlikle Katılıyorum	Kesinlikle Katılmıyorum	Kesinlikle Katılmıyorum	Kesinlikle Katılmıyorum	Kesinlikle Katılıyorum	Kesinlikle Katılıyorum	Kesinlikle Katılmıyorum	Kesinlikle Katılmıyorum	Kesinlikle Katılıyorum	Kesinlikle Katılmıyorum	Kesinlikle Katılıyorum	Çoğu Zaman	Her Zaman	Çoğu Zaman	Çoğu Zaman	Çoğu Zaman
2023-08-02 13:06:42	0	Erkek	31-39 yaş	Evli	Doktora	Doktor	Cerrahi Klinikleri	5 yıl ve üzeri	6-10 yıl	Gündüz/Gece dönüşümlü	Sempozyum	Katıldım	El hijyeni ile ilgili bilgilerimin yeterli olduğunu düşünüyorum.	Alkol bazlı el dezenfektanı	30 saniyeden fazla	İş yükünün fazla olması, Zaman kısıtlılığı	Katılıyorum	Katılıyorum	Katılıyorum	Katılıyorum	Katılıyorum	Katılıyorum	Katılıyorum	Katılıyorum	Katılıyorum	Kesinlikle Katılıyorum	Katılıyorum	Katılıyorum	Katılıyorum	Katılıyorum	Katılıyorum	Katılıyorum	Katılıyorum	Katılıyorum	Katılıyorum	Katılıyorum	Katılıyorum	Katılıyorum	Katılıyorum	Katılıyorum	Katılıyorum	Katılıyorum	Katılmıyorum	Kararsızım	Her Zaman	Her Zaman	Çoğu Zaman	Çoğu Zaman	Her Zaman
2023-08-02 13:09:59	0	Erkek	21-30 yaş	Evli	Yüksek Lisans	Doktor	Ameliyathane	0-2 yıl	1-5 yıl	Gündüz/Gece dönüşümlü	Kurs	Katıldım	El hijyeni ile ilgili bilgilerimin yeterli olduğunu düşünüyorum.	Su ve sabun	15-30 saniye	İş yükünün fazla olması	Katılıyorum	Kararsızım	Katılıyorum	Katılıyorum	Katılmıyorum	Katılıyorum	Katılıyorum	Katılmıyorum	Katılıyorum	Katılıyorum	Katılıyorum	Kararsızım	Katılıyorum	Katılıyorum	Katılıyorum	Katılmıyorum	Katılmıyorum	Katılıyorum	Katılmıyorum	Katılıyorum	Katılıyorum	Katılıyorum	Katılıyorum	Katılmıyorum	Katılmıyorum	Katılıyorum	Kararsızım	Katılıyorum	Çoğu Zaman	Çoğu Zaman	Çoğu Zaman	Çoğu Zaman	Çoğu Zaman
2023-08-02 13:10:01	0	Erkek	21-30 yaş	Bekâr	Yüksek Lisans	Doktor	Ameliyathane	0-2 yıl	1-5 yıl	Gündüz/Gece dönüşümlü	Tıp Fakültesinde Ders Aldık	Hiç Katılmadım	El hijyeni ile ilgili bilgilerimin yeterli olduğunu düşünüyorum.	Su ve sabun	15-30 saniye	İş yükünün fazla olması	Katılıyorum	Katılıyorum	Katılıyorum	Katılıyorum	Kararsızım	Katılıyorum	Kesinlikle Katılıyorum	Katılıyorum	Katılıyorum	Katılmıyorum	Katılıyorum	Katılmıyorum	Kararsızım	Katılıyorum	Kararsızım	Katılıyorum	Katılıyorum	Kararsızım	Katılmıyorum	Katılıyorum	Katılıyorum	Katılıyorum	Kesinlikle Katılıyorum	Katılmıyorum	Katılmıyorum	Kesinlikle Katılıyorum	Katılmıyorum	Katılıyorum	Sıklıkla	Sıklıkla	Bazen	Çoğu Zaman	Çoğu Zaman
2023-08-02 13:18:31	0	Erkek	31-39 yaş	Evli	Doktora	Doktor	YBÜ	3-4 yıl	6-10 yıl	Gündüz/Gece dönüşümlü	Konferans	Katıldım	El hijyeni ile ilgili bilgilerimin yeterli olduğunu düşünüyorum.	Su ve sabun	30 saniyeden fazla	Zaman kısıtlılığı, Rol model eksikliği	Kesinlikle Katılıyorum	Kesinlikle Katılıyorum	Kesinlikle Katılıyorum	Kesinlikle Katılıyorum	Kesinlikle Katılmıyorum	Kesinlikle Katılıyorum	Kesinlikle Katılıyorum	Kesinlikle Katılmıyorum	Kesinlikle Katılıyorum	Katılıyorum	Kesinlikle Katılıyorum	Katılıyorum	Kesinlikle Katılmıyorum	Katılıyorum	Katılıyorum	Katılıyorum	Katılıyorum	Katılmıyorum	Kesinlikle Katılmıyorum	Kesinlikle Katılıyorum	Kesinlikle Katılıyorum	Kesinlikle Katılıyorum	Kesinlikle Katılıyorum	Kesinlikle Katılmıyorum	Kesinlikle Katılmıyorum	Kesinlikle Katılıyorum	Kesinlikle Katılmıyorum	Kesinlikle Katılmıyorum	Bazen	Çoğu Zaman	Her Zaman	Çoğu Zaman	Her Zaman
2023-08-02 13:21:10	0	Erkek	21-30 yaş	Bekâr	Doktora	Doktor	Ameliyathane	0-2 yıl	1-5 yıl	Gündüz	Kurs	Katıldım	El hijyeni ile ilgili bilgilerimin yeterli olduğunu düşünüyorum.	Su ve sabun	30 saniyeden fazla	El hijyeni için bilgilendirici tabela, afiş, rehberlerin eksikliği	Katılıyorum	Kararsızım	Kesinlikle Katılıyorum	Katılıyorum	Katılmıyorum	Kararsızım	Kararsızım	Katılıyorum	Katılıyorum	Kararsızım	Katılıyorum	Katılıyorum	Kararsızım	Katılıyorum	Katılıyorum	Katılıyorum	Katılıyorum	Katılıyorum	Katılmıyorum	Katılıyorum	Kararsızım	Katılıyorum	Katılıyorum	Katılıyorum	Katılıyorum	Katılıyorum	Katılıyorum	Katılıyorum	Çoğu Zaman	Çoğu Zaman	Çoğu Zaman	Sıklıkla	Bazen
2023-08-02 13:24:55	0	Kadın	31-39 yaş	Bekâr	Üniversite	Hemşire/Sağlık Memuru	Ameliyathane	3-4 yıl	11-15 yıl	Gündüz/Gece dönüşümlü	Konferans	Katıldım	El hijyeni ile ilgili bilgilerimin yeterli olduğunu düşünüyorum.	Alkol bazlı el dezenfektanı	15-30 saniye	Zaman kısıtlılığı	Kesinlikle Katılıyorum	Katılıyorum	Katılıyorum	Kesinlikle Katılıyorum	Katılmıyorum	Katılıyorum	Katılıyorum	Katılıyorum	Katılıyorum	Katılmıyorum	Kesinlikle Katılıyorum	Kararsızım	Katılıyorum	Kesinlikle Katılıyorum	Kesinlikle Katılıyorum	Katılmıyorum	Katılmıyorum	Katılıyorum	Katılmıyorum	Katılmıyorum	Katılmıyorum	Katılmıyorum	Kesinlikle Katılıyorum	Kesinlikle Katılmıyorum	Kesinlikle Katılmıyorum	Katılıyorum	Katılmıyorum	Katılmıyorum	Her Zaman	Her Zaman	Her Zaman	Her Zaman	Her Zaman
2023-08-02 13:52:42	0	Erkek	21-30 yaş	Bekâr	Yüksek Lisans	Doktor	Cerrahi Klinikleri	3-4 yıl	1-5 yıl	Gündüz/Gece dönüşümlü	Katılmadım	Hiç Katılmadım	El hijyeni ile ilgili bilgilerimin yeterli olduğunu düşünüyorum.	Su ve sabun	30 saniyeden fazla	El hijyeni için gerekli malzemelerin eksikliği, Rol model eksikliği	Kararsızım	Katılmıyorum	Katılmıyorum	Kararsızım	Katılmıyorum	Katılmıyorum	Kesinlikle Katılıyorum	Katılıyorum	Katılıyorum	Katılıyorum	Kesinlikle Katılıyorum	Katılmıyorum	Katılıyorum	Kesinlikle Katılıyorum	Kesinlikle Katılıyorum	Katılıyorum	Katılıyorum	Katılıyorum	Kesinlikle Katılmıyorum	Kararsızım	Katılıyorum	Katılıyorum	Kesinlikle Katılıyorum	Kesinlikle Katılmıyorum	Kesinlikle Katılmıyorum	Kesinlikle Katılıyorum	Kesinlikle Katılıyorum	Kesinlikle Katılıyorum	Sıklıkla	Sıklıkla	Çoğu Zaman	Bazen	Sıklıkla
2023-08-02 14:16:47	0	Kadın	21-30 yaş	Bekâr	Yüksek Lisans	Doktor	Ameliyathane	3-4 yıl	1-5 yıl	Gündüz/Gece dönüşümlü	Kurs	Katıldım	El hijyeni ile ilgili bilgilerimin yeterli olduğunu düşünüyorum.	Alkol bazlı el dezenfektanı	15-30 saniye	İş yükünün fazla olması, El hijyeni için gerekli malzemelerin eksikliği, Zaman kısıtlılığı	Kesinlikle Katılıyorum	Kesinlikle Katılıyorum	Kesinlikle Katılıyorum	Kesinlikle Katılıyorum	Kararsızım	Kesinlikle Katılıyorum	Kesinlikle Katılıyorum	Kararsızım	Kesinlikle Katılıyorum	Katılmıyorum	Kesinlikle Katılıyorum	Kesinlikle Katılıyorum	Kesinlikle Katılıyorum	Kesinlikle Katılıyorum	Katılıyorum	Katılıyorum	Katılıyorum	Kesinlikle Katılmıyorum	Kesinlikle Katılmıyorum	Kararsızım	Kararsızım	Kesinlikle Katılıyorum	Kesinlikle Katılıyorum	Kesinlikle Katılmıyorum	Kesinlikle Katılmıyorum	Kesinlikle Katılıyorum	Katılıyorum	Kesinlikle Katılıyorum	Çoğu Zaman	Çoğu Zaman	Çoğu Zaman	Çoğu Zaman	Çoğu Zaman
2023-08-02 15:05:23	0	Kadın	21-30 yaş	Bekâr	Yüksek Lisans	Doktor	Ameliyathane	3-4 yıl	1-5 yıl	Gündüz/Gece dönüşümlü	Kurum İçi Egitim	Katıldım	El hijyeni ile ilgili bilgilerimin yeterli olduğunu düşünüyorum.	Alkol bazlı el dezenfektanı	30 saniyeden fazla	El hijyeni için gerekli malzemelerin eksikliği	Kesinlikle Katılıyorum	Katılıyorum	Kararsızım	Katılıyorum	Katılmıyorum	Katılıyorum	Kesinlikle Katılıyorum	Katılmıyorum	Kesinlikle Katılıyorum	Katılmıyorum	Kesinlikle Katılıyorum	Kararsızım	Kesinlikle Katılıyorum	Kesinlikle Katılıyorum	Katılıyorum	Katılmıyorum	Katılmıyorum	Kararsızım	Katılmıyorum	Katılıyorum	Katılıyorum	Kesinlikle Katılıyorum	Kesinlikle Katılıyorum	Kesinlikle Katılmıyorum	Kesinlikle Katılmıyorum	Kesinlikle Katılıyorum	Kesinlikle Katılıyorum	Kesinlikle Katılıyorum	Çoğu Zaman	Her Zaman	Her Zaman	Her Zaman	Her Zaman
2023-08-02 17:46:46	0	Kadın	21-30 yaş	Bekâr	Yüksek Lisans	Doktor	Ameliyathane	3-4 yıl	1-5 yıl	Gündüz/Gece dönüşümlü	Kurum İçi Egitim	Katıldım	El hijyeni ile ilgili bilgilerimin yeterli olduğunu düşünüyorum.	Su ve sabun	15-30 saniye	El hijyeni için gerekli malzemelerin eksikliği	Kesinlikle Katılıyorum	Katılıyorum	Katılıyorum	Katılıyorum	Kararsızım	Katılıyorum	Katılıyorum	Katılmıyorum	Katılıyorum	Katılıyorum	Katılıyorum	Katılıyorum	Katılıyorum	Katılıyorum	Katılıyorum	Katılmıyorum	Katılmıyorum	Katılıyorum	Kesinlikle Katılmıyorum	Katılmıyorum	Katılıyorum	Katılıyorum	Kesinlikle Katılıyorum	Katılmıyorum	Katılmıyorum	Katılıyorum	Katılıyorum	Katılıyorum	Çoğu Zaman	Çoğu Zaman	Bazen	Sıklıkla	Sıklıkla
2023-08-02 18:36:32	0	Kadın	21-30 yaş	Bekâr	Yüksek Lisans	Doktor	Ameliyathane	3-4 yıl	1-5 yıl	Gündüz/Gece dönüşümlü	Konferans	Katıldım	El hijyeni ile ilgili bilgilerimin yeterli olduğunu düşünüyorum.	Su ve sabun	15-30 saniye	İş yükünün fazla olması, Zaman kısıtlılığı	Kesinlikle Katılıyorum	Katılıyorum	Katılıyorum	Katılıyorum	Kararsızım	Katılıyorum	Katılıyorum	Kararsızım	Katılıyorum	Katılıyorum	Katılıyorum	Kararsızım	Katılıyorum	Katılıyorum	Katılıyorum	Katılıyorum	Katılıyorum	Kararsızım	Katılmıyorum	Kararsızım	Kararsızım	Katılıyorum	Katılıyorum	Kesinlikle Katılmıyorum	Kesinlikle Katılmıyorum	Katılıyorum	Kararsızım	Katılıyorum	Çoğu Zaman	Her Zaman	Çoğu Zaman	Her Zaman	Her Zaman
2023-08-02 18:53:46	0	Kadın	21-30 yaş	Bekâr	Yüksekokul	Hemşire/Sağlık Memuru	YBÜ	3-4 yıl	1-5 yıl	Gündüz/Gece dönüşümlü	Kurum İçi Egitim	Katıldım	El hijyeni ile ilgili bilgilerimin yeterli olduğunu düşünüyorum.	Su ve sabun	15-30 saniye	İş yükünün fazla olması, Zaman kısıtlılığı	Kesinlikle Katılıyorum	Kesinlikle Katılıyorum	Kesinlikle Katılıyorum	Kesinlikle Katılıyorum	Katılmıyorum	Katılıyorum	Katılıyorum	Katılmıyorum	Katılıyorum	Katılıyorum	Katılıyorum	Kararsızım	Katılıyorum	Katılıyorum	Katılıyorum	Katılmıyorum	Katılmıyorum	Katılmıyorum	Katılmıyorum	Kararsızım	Katılıyorum	Katılıyorum	Katılıyorum	Katılmıyorum	Katılmıyorum	Katılıyorum	Katılıyorum	Katılıyorum	Bazen	Çoğu Zaman	Bazen	Sıklıkla	Çoğu Zaman
2023-08-02 20:53:55	0	Erkek	21-30 yaş	Bekâr	Yüksek Lisans	Doktor	Ameliyathane	3-4 yıl	1-5 yıl	Gündüz/Gece dönüşümlü	Kurum İçi Egitim	Katıldım	El hijyeni ile ilgili bilgilerimin yeterli olduğunu düşünüyorum.	Su ve sabun	15-30 saniye	Zaman kısıtlılığı	Kesinlikle Katılıyorum	Katılıyorum	Katılıyorum	Kesinlikle Katılıyorum	Katılmıyorum	Kesinlikle Katılıyorum	Kesinlikle Katılıyorum	Katılmıyorum	Katılıyorum	Katılmıyorum	Katılıyorum	Kesinlikle Katılıyorum	Katılıyorum	Kesinlikle Katılıyorum	Katılıyorum	Katılıyorum	Kararsızım	Katılmıyorum	Katılmıyorum	Katılmıyorum	Katılıyorum	Katılıyorum	Kesinlikle Katılıyorum	Katılmıyorum	Kesinlikle Katılmıyorum	Kesinlikle Katılıyorum	Katılıyorum	Kesinlikle Katılıyorum	Bazen	Her Zaman	Sıklıkla	Çoğu Zaman	Her Zaman
2023-08-03 09:10:40	0	Kadın	21-30 yaş	Bekâr	Yüksek Lisans	Doktor	Ameliyathane	3-4 yıl	1-5 yıl	Gündüz/Gece dönüşümlü	Kurum İçi Egitim	Katıldım	El hijyeni ile ilgili bilgilerimin yeterli olduğunu düşünüyorum.	Su ve sabun	15-30 saniye	İş yükünün fazla olması	Kesinlikle Katılıyorum	Katılıyorum	Katılıyorum	Katılıyorum	Katılmıyorum	Kesinlikle Katılıyorum	Katılıyorum	Katılmıyorum	Katılıyorum	Katılıyorum	Katılıyorum	Katılıyorum	Katılıyorum	Katılıyorum	Katılıyorum	Katılıyorum	Katılıyorum	Kararsızım	Katılmıyorum	Katılmıyorum	Katılmıyorum	Katılıyorum	Kesinlikle Katılıyorum	Katılıyorum	Katılıyorum	Katılıyorum	Katılıyorum	Katılıyorum	Bazen	Çoğu Zaman	Sıklıkla	Her Zaman	Her Zaman
2023-08-03 09:26:48	0	Kadın	21-30 yaş	Bekâr	Yüksek Lisans	Doktor	Ameliyathane	3-4 yıl	1-5 yıl	Gündüz/Gece dönüşümlü	Kurs	Katıldım	El hijyeni ile ilgili bilgilerimin yeterli olduğunu düşünüyorum.	Su ve sabun	30 saniyeden fazla	Zaman kısıtlılığı	Kesinlikle Katılıyorum	Kesinlikle Katılıyorum	Katılıyorum	Katılıyorum	Kesinlikle Katılmıyorum	Kesinlikle Katılıyorum	Kesinlikle Katılıyorum	Kesinlikle Katılmıyorum	Kesinlikle Katılıyorum	Kesinlikle Katılıyorum	Kesinlikle Katılıyorum	Kesinlikle Katılıyorum	Kesinlikle Katılıyorum	Kesinlikle Katılıyorum	Kesinlikle Katılıyorum	Kesinlikle Katılıyorum	Kesinlikle Katılıyorum	Kesinlikle Katılmıyorum	Kesinlikle Katılmıyorum	Kesinlikle Katılmıyorum	Kesinlikle Katılmıyorum	Kesinlikle Katılıyorum	Kesinlikle Katılıyorum	Kesinlikle Katılmıyorum	Kesinlikle Katılmıyorum	Kesinlikle Katılıyorum	Katılıyorum	Kesinlikle Katılıyorum	Her Zaman	Her Zaman	Her Zaman	Her Zaman	Her Zaman
2023-08-11 09:33:47	0	Kadın	21-30 yaş	Evli	Yüksekokul	Hemşire/Sağlık Memuru	Ameliyathane	3-4 yıl	1-5 yıl	Gündüz/Gece dönüşümlü	Kurum İçi Egitim	Katıldım	El hijyeni ile ilgili bilgilerimin yeterli olduğunu düşünüyorum.	Alkol bazlı el dezenfektanı	15-30 saniye	İş yükünün fazla olması, Zaman kısıtlılığı	Kesinlikle Katılıyorum	Katılıyorum	Katılıyorum	Katılıyorum	Katılmıyorum	Kesinlikle Katılıyorum	Katılıyorum	Katılıyorum	Katılıyorum	Katılıyorum	Kesinlikle Katılıyorum	Katılıyorum	Kararsızım	Kesinlikle Katılıyorum	Kesinlikle Katılıyorum	Katılıyorum	Katılıyorum	Katılıyorum	Katılmıyorum	Katılıyorum	Katılıyorum	Kesinlikle Katılıyorum	Kesinlikle Katılıyorum	Kesinlikle Katılmıyorum	Kesinlikle Katılmıyorum	Kesinlikle Katılıyorum	Katılıyorum	Kesinlikle Katılmıyorum	Çoğu Zaman	Çoğu Zaman	Çoğu Zaman	Çoğu Zaman	Çoğu Zaman
2023-08-11 09:43:06	0	Kadın	21-30 yaş	Evli	Yüksek Lisans	Doktor	Ameliyathane	3-4 yıl	1-5 yıl	Gündüz/Gece dönüşümlü	Kurs	Katıldım	El hijyeni ile ilgili bilgilerimin yeterli olduğunu düşünüyorum.	Su ve sabun	15-30 saniye	İş yükünün fazla olması, Zaman kısıtlılığı	Kesinlikle Katılıyorum	Katılıyorum	Katılıyorum	Katılıyorum	Katılmıyorum	Katılıyorum	Katılıyorum	Katılıyorum	Katılıyorum	Katılıyorum	Kesinlikle Katılıyorum	Katılıyorum	Katılıyorum	Katılıyorum	Katılıyorum	Katılıyorum	Katılıyorum	Kararsızım	Katılmıyorum	Kararsızım	Katılıyorum	Katılıyorum	Katılıyorum	Katılmıyorum	Katılmıyorum	Kesinlikle Katılmıyorum	Kararsızım	Katılmıyorum	Çoğu Zaman	Her Zaman	Her Zaman	Her Zaman	Her Zaman
2023-08-11 10:28:51	0	Kadın	21-30 yaş	Evli	Yüksek Lisans	Doktor	Ameliyathane	3-4 yıl	1-5 yıl	Gündüz/Gece dönüşümlü	Tıp Fakültesinde Ders Aldık	Katıldım	El hijyeni ile ilgili bilgilerimin yeterli olduğunu düşünüyorum.	Su ve sabun	15-30 saniye	İş yükünün fazla olması, El hijyeni için gerekli malzemelerin eksikliği, Zaman kısıtlılığı	Kesinlikle Katılıyorum	Katılıyorum	Katılıyorum	Katılıyorum	Kesinlikle Katılmıyorum	Kararsızım	Katılıyorum	Katılmıyorum	Kesinlikle Katılıyorum	Katılıyorum	Katılıyorum	Kararsızım	Katılıyorum	Katılıyorum	Katılıyorum	Katılıyorum	Katılıyorum	Katılmıyorum	Katılıyorum	Katılmıyorum	Katılıyorum	Katılıyorum	Katılıyorum	Kesinlikle Katılmıyorum	Kesinlikle Katılmıyorum	Kesinlikle Katılıyorum	Katılmıyorum	Katılıyorum	Her Zaman	Her Zaman	Sıklıkla	Çoğu Zaman	Her Zaman
2023-08-11 10:29:46	0	Kadın	21-30 yaş	Bekâr	Yüksekokul	Hemşire/Sağlık Memuru	Ameliyathane	3-4 yıl	1-5 yıl	Gündüz/Gece dönüşümlü	Tıp Fakültesinde Ders Aldık	Katıldım	El hijyeni ile ilgili bilgilerimin yeterli olduğunu düşünüyorum.	Su ve sabun	15-30 saniye	İş yükünün fazla olması	Kesinlikle Katılıyorum	Katılıyorum	Kesinlikle Katılıyorum	Katılıyorum	Kesinlikle Katılmıyorum	Kesinlikle Katılıyorum	Kesinlikle Katılıyorum	Katılıyorum	Katılıyorum	Kesinlikle Katılıyorum	Kesinlikle Katılıyorum	Kesinlikle Katılıyorum	Kararsızım	Kesinlikle Katılıyorum	Kesinlikle Katılıyorum	Katılıyorum	Katılıyorum	Kesinlikle Katılmıyorum	Kesinlikle Katılmıyorum	Kesinlikle Katılıyorum	Kesinlikle Katılıyorum	Kesinlikle Katılıyorum	Kesinlikle Katılıyorum	Kesinlikle Katılmıyorum	Kesinlikle Katılmıyorum	Kesinlikle Katılıyorum	Kesinlikle Katılıyorum	Kesinlikle Katılıyorum	Her Zaman	Her Zaman	Her Zaman	Her Zaman	Her Zaman
2023-08-11 10:30:28	0	Kadın	21-30 yaş	Bekâr	Yüksekokul	Hemşire/Sağlık Memuru	Ameliyathane	3-4 yıl	1-5 yıl	Gündüz/Gece dönüşümlü	Tıp Fakültesinde Ders Aldık	Katıldım	El hijyeni ile ilgili bilgilerimin yeterli olduğunu düşünüyorum.	Su ve sabun	15-30 saniye	El hijyeni için gerekli malzemelerin eksikliği	Kesinlikle Katılıyorum	Kesinlikle Katılıyorum	Kesinlikle Katılıyorum	Kesinlikle Katılıyorum	Kesinlikle Katılmıyorum	Kesinlikle Katılıyorum	Kesinlikle Katılıyorum	Katılmıyorum	Kesinlikle Katılıyorum	Kesinlikle Katılıyorum	Kesinlikle Katılıyorum	Katılıyorum	Katılıyorum	Kesinlikle Katılıyorum	Katılıyorum	Katılmıyorum	Katılmıyorum	Kararsızım	Katılıyorum	Katılıyorum	Kararsızım	Kesinlikle Katılıyorum	Kesinlikle Katılıyorum	Katılmıyorum	Kesinlikle Katılmıyorum	Katılıyorum	Katılıyorum	Kesinlikle Katılıyorum	Her Zaman	Her Zaman	Sıklıkla	Çoğu Zaman	Çoğu Zaman
2023-08-11 10:31:15	0	Kadın	21-30 yaş	Bekâr	Yüksekokul	Hemşire/Sağlık Memuru	Ameliyathane	3-4 yıl	1-5 yıl	Gündüz/Gece dönüşümlü	Kurum İçi Egitim	Katıldım	El hijyeni ile ilgili bilgilerimin yeterli olduğunu düşünüyorum.	Su ve sabun	15-30 saniye	İş yükünün fazla olması	Kesinlikle Katılıyorum	Katılıyorum	Katılıyorum	Kararsızım	Katılmıyorum	Kararsızım	Kararsızım	Kararsızım	Katılıyorum	Katılıyorum	Kesinlikle Katılıyorum	Katılmıyorum	Katılıyorum	Katılıyorum	Katılıyorum	Katılıyorum	Katılıyorum	Katılıyorum	Katılmıyorum	Kararsızım	Katılıyorum	Katılıyorum	Katılıyorum	Kesinlikle Katılmıyorum	Kesinlikle Katılmıyorum	Kesinlikle Katılıyorum	Katılıyorum	Katılıyorum	Her Zaman	Her Zaman	Her Zaman	Sıklıkla	Her Zaman
2023-08-11 10:37:43	0	Kadın	21-30 yaş	Evli	Yüksekokul	Hemşire/Sağlık Memuru	Ameliyathane	3-4 yıl	1-5 yıl	Gündüz/Gece dönüşümlü	Sempozyum	Katıldım	El hijyeni ile ilgili bilgilerimin yeterli olduğunu düşünüyorum.	Su ve sabun	15-30 saniye	El hijyeni için gerekli malzemelerin eksikliği	Kesinlikle Katılıyorum	Kesinlikle Katılmıyorum	Kesinlikle Katılmıyorum	Kesinlikle Katılmıyorum	Kesinlikle Katılmıyorum	Kesinlikle Katılıyorum	Kesinlikle Katılıyorum	Kesinlikle Katılmıyorum	Kesinlikle Katılıyorum	Katılıyorum	Katılıyorum	Kararsızım	Katılıyorum	Kesinlikle Katılıyorum	Kesinlikle Katılıyorum	Katılıyorum	Katılıyorum	Katılmıyorum	Katılmıyorum	Kesinlikle Katılıyorum	Kesinlikle Katılıyorum	Kesinlikle Katılıyorum	Kesinlikle Katılıyorum	Katılmıyorum	Katılmıyorum	Kesinlikle Katılıyorum	Kararsızım	Katılıyorum	Her Zaman	Her Zaman	Her Zaman	Her Zaman	Her Zaman
2023-08-11 10:39:30	0	Kadın	21-30 yaş	Evli	Yüksekokul	Hemşire/Sağlık Memuru	Ameliyathane	3-4 yıl	1-5 yıl	Gündüz/Gece dönüşümlü	Kurum İçi Egitim	Katıldım	El hijyeni ile ilgili bilgilerimin yeterli olduğunu düşünüyorum.	Alkol bazlı el dezenfektanı	15-30 saniye	İş yükünün fazla olması, El hijyeni için gerekli malzemelerin eksikliği, Zaman kısıtlılığı	Kesinlikle Katılıyorum	Katılıyorum	Katılıyorum	Katılıyorum	Kesinlikle Katılmıyorum	Kesinlikle Katılmıyorum	Kesinlikle Katılmıyorum	Katılmıyorum	Kesinlikle Katılmıyorum	Katılmıyorum	Katılıyorum	Katılıyorum	Katılıyorum	Katılıyorum	Katılıyorum	Katılmıyorum	Katılmıyorum	Katılmıyorum	Katılmıyorum	Katılıyorum	Katılıyorum	Katılıyorum	Katılıyorum	Katılmıyorum	Katılmıyorum	Kesinlikle Katılıyorum	Katılıyorum	Kesinlikle Katılıyorum	Her Zaman	Her Zaman	Her Zaman	Her Zaman	Her Zaman
2023-08-11 10:41:37	0	Kadın	21-30 yaş	Bekâr	Yüksekokul	Hemşire/Sağlık Memuru	Ameliyathane	3-4 yıl	1-5 yıl	Gündüz/Gece dönüşümlü	Kurs	Katıldım	El hijyeni ile ilgili bilgilerimin yeterli olduğunu düşünüyorum.	Su ve sabun	15-30 saniye	El hijyeni için gerekli malzemelerin eksikliği	Kesinlikle Katılıyorum	Kesinlikle Katılmıyorum	Kesinlikle Katılıyorum	Kesinlikle Katılıyorum	Kararsızım	Kararsızım	Kararsızım	Katılıyorum	Kesinlikle Katılıyorum	Kesinlikle Katılıyorum	Kesinlikle Katılıyorum	Katılıyorum	Kesinlikle Katılıyorum	Kesinlikle Katılıyorum	Kesinlikle Katılıyorum	Katılmıyorum	Katılmıyorum	Katılmıyorum	Kararsızım	Katılmıyorum	Katılıyorum	Kesinlikle Katılıyorum	Kesinlikle Katılıyorum	Katılmıyorum	Kesinlikle Katılmıyorum	Kesinlikle Katılıyorum	Kararsızım	Kesinlikle Katılıyorum	Her Zaman	Her Zaman	Her Zaman	Her Zaman	Her Zaman
2023-08-11 10:42:00	0	Kadın	21-30 yaş	Evli	Yüksekokul	Hemşire/Sağlık Memuru	Ameliyathane	3-4 yıl	1-5 yıl	Gündüz/Gece dönüşümlü	Kurum İçi Egitim	Katıldım	El hijyeni ile ilgili bilgilerimin yeterli olduğunu düşünüyorum.	Alkol bazlı el dezenfektanı	15-30 saniye	El hijyeni için gerekli malzemelerin eksikliği, Zaman kısıtlılığı	Kesinlikle Katılıyorum	Katılıyorum	Katılıyorum	Katılıyorum	Kararsızım	Katılıyorum	Katılıyorum	Kararsızım	Katılıyorum	Katılıyorum	Katılıyorum	Kesinlikle Katılıyorum	Katılıyorum	Katılıyorum	Kesinlikle Katılıyorum	Kararsızım	Katılmıyorum	Kararsızım	Katılmıyorum	Katılıyorum	Kesinlikle Katılıyorum	Katılıyorum	Kesinlikle Katılıyorum	Kesinlikle Katılmıyorum	Kesinlikle Katılmıyorum	Katılıyorum	Katılıyorum	Katılıyorum	Her Zaman	Her Zaman	Bazen	Her Zaman	Her Zaman
2023-08-11 10:49:04	0	Kadın	21-30 yaş	Evli	Yüksekokul	Hemşire/Sağlık Memuru	Ameliyathane	3-4 yıl	6-10 yıl	Gündüz/Gece dönüşümlü	Kurum İçi Egitim	Katıldım	El hijyeni ile ilgili bilgilerimin yeterli olduğunu düşünüyorum.	Su ve sabun	15-30 saniye	İş yükünün fazla olması, Zaman kısıtlılığı	Kesinlikle Katılıyorum	Katılıyorum	Katılıyorum	Katılıyorum	Katılmıyorum	Katılıyorum	Katılıyorum	Katılmıyorum	Kesinlikle Katılıyorum	Katılmıyorum	Katılıyorum	Katılıyorum	Kesinlikle Katılıyorum	Kesinlikle Katılıyorum	Kararsızım	Katılıyorum	Katılıyorum	Kararsızım	Katılmıyorum	Katılıyorum	Katılıyorum	Katılıyorum	Kesinlikle Katılıyorum	Kesinlikle Katılmıyorum	Kesinlikle Katılmıyorum	Kesinlikle Katılıyorum	Katılıyorum	Kesinlikle Katılıyorum	Her Zaman	Her Zaman	Her Zaman	Her Zaman	Her Zaman
2023-08-11 10:49:27	0	Kadın	21-30 yaş	Evli	Yüksekokul	Hemşire/Sağlık Memuru	Ameliyathane	3-4 yıl	1-5 yıl	Gündüz/Gece dönüşümlü	Kurum İçi Egitim	Katıldım	El hijyeni ile ilgili bilgilerimin yeterli olduğunu düşünüyorum.	Alkol bazlı el dezenfektanı	15-30 saniye	İş yükünün fazla olması, Zaman kısıtlılığı	Kesinlikle Katılıyorum	Katılıyorum	Katılıyorum	Katılıyorum	Kesinlikle Katılmıyorum	Kararsızım	Kararsızım	Kesinlikle Katılmıyorum	Kesinlikle Katılmıyorum	Katılıyorum	Kesinlikle Katılmıyorum	Katılıyorum	Katılıyorum	Katılıyorum	Katılıyorum	Katılıyorum	Katılıyorum	Katılıyorum	Kararsızım	Katılmıyorum	Kararsızım	Katılıyorum	Katılıyorum	Kesinlikle Katılmıyorum	Kesinlikle Katılmıyorum	Katılıyorum	Katılıyorum	Katılıyorum	Her Zaman	Her Zaman	Her Zaman	Her Zaman	Her Zaman
2023-08-11 10:54:46	0	Kadın	21-30 yaş	Evli	Yüksekokul	Hemşire/Sağlık Memuru	Ameliyathane	3-4 yıl	1-5 yıl	Gündüz/Gece dönüşümlü	Kurum İçi Egitim	Katıldım	El hijyeni ile ilgili bilgilerimin yeterli olduğunu düşünüyorum.	Su ve sabun	15-30 saniye	İş yükünün fazla olması, Zaman kısıtlılığı	Kesinlikle Katılıyorum	Kararsızım	Kesinlikle Katılıyorum	Katılıyorum	Kesinlikle Katılmıyorum	Katılıyorum	Kesinlikle Katılıyorum	Kesinlikle Katılmıyorum	Kesinlikle Katılıyorum	Katılıyorum	Kesinlikle Katılıyorum	Katılmıyorum	Kesinlikle Katılıyorum	Kesinlikle Katılıyorum	Kesinlikle Katılıyorum	Katılmıyorum	Katılmıyorum	Katılıyorum	Kesinlikle Katılmıyorum	Katılıyorum	Kararsızım	Kesinlikle Katılıyorum	Kesinlikle Katılıyorum	Katılmıyorum	Katılmıyorum	Kesinlikle Katılıyorum	Katılmıyorum	Kesinlikle Katılıyorum	Çoğu Zaman	Çoğu Zaman	Çoğu Zaman	Her Zaman	Her Zaman
2023-08-11 10:54:46	0	Kadın	21-30 yaş	Bekâr	Yüksekokul	Hemşire/Sağlık Memuru	Ameliyathane	3-4 yıl	1-5 yıl	Gündüz/Gece dönüşümlü	Sempozyum	Katıldım	El hijyeni ile ilgili bilgilerimin yeterli olduğunu düşünüyorum.	Su ve sabun	15-30 saniye	İş yükünün fazla olması, El hijyeni için gerekli malzemelerin eksikliği, Zaman kısıtlılığı	Kesinlikle Katılıyorum	Katılmıyorum	Katılmıyorum	Katılıyorum	Katılmıyorum	Kesinlikle Katılıyorum	Kesinlikle Katılıyorum	Kararsızım	Kesinlikle Katılıyorum	Katılmıyorum	Kesinlikle Katılıyorum	Katılıyorum	Kararsızım	Kesinlikle Katılıyorum	Katılıyorum	Katılmıyorum	Katılmıyorum	Kararsızım	Kesinlikle Katılmıyorum	Katılmıyorum	Katılmıyorum	Kesinlikle Katılıyorum	Kesinlikle Katılıyorum	Kararsızım	Katılmıyorum	Kesinlikle Katılıyorum	Katılıyorum	Kesinlikle Katılıyorum	Çoğu Zaman	Her Zaman	Çoğu Zaman	Sıklıkla	Her Zaman
2023-08-11 13:03:15	0	Kadın	21-30 yaş	Bekâr	Yüksekokul	Hemşire/Sağlık Memuru	Ameliyathane	3-4 yıl	1-5 yıl	Gündüz/Gece dönüşümlü	Kurum İçi Egitim	Katıldım	El hijyeni ile ilgili bilgilerimin yeterli olduğunu düşünüyorum.	Su ve sabun	15-30 saniye	El hijyeni için gerekli malzemelerin eksikliği	Kesinlikle Katılıyorum	Katılıyorum	Katılmıyorum	Katılıyorum	Katılmıyorum	Katılıyorum	Katılıyorum	Katılmıyorum	Katılıyorum	Katılıyorum	Katılıyorum	Katılıyorum	Katılıyorum	Katılıyorum	Katılıyorum	Katılmıyorum	Katılmıyorum	Katılmıyorum	Katılmıyorum	Kararsızım	Katılıyorum	Katılıyorum	Katılıyorum	Katılmıyorum	Katılmıyorum	Katılıyorum	Katılmıyorum	Katılıyorum	Çoğu Zaman	Çoğu Zaman	Çoğu Zaman	Çoğu Zaman	Çoğu Zaman
[truncated: 15 more columns]
